# Supplementary material for: Control of tissue development and cell diversity by cell cycle-dependent transcriptional filtering
Source: eLife journal article supplement (doi:10.7554/elife.64951), 2021-07-02

environment -sensing

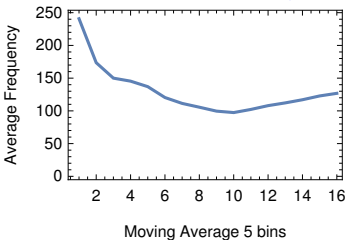

immune

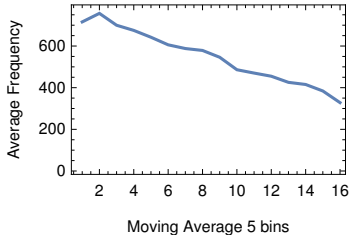

lymphoid

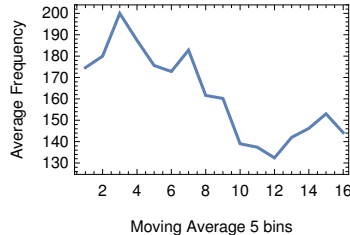

myeloid

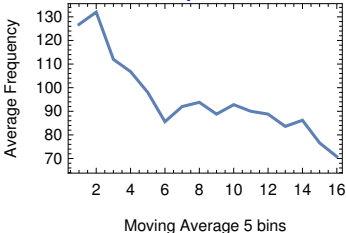

olfactory

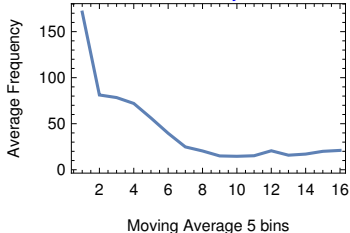

translation

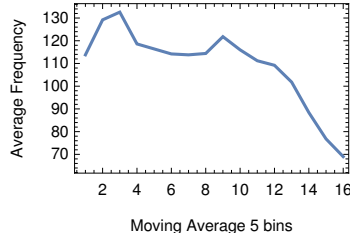

brain

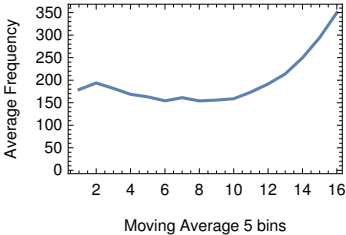

cytoskeleton

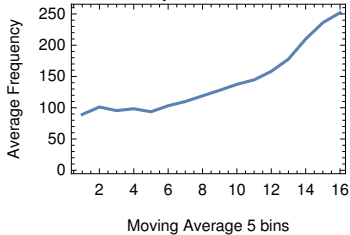

muscle

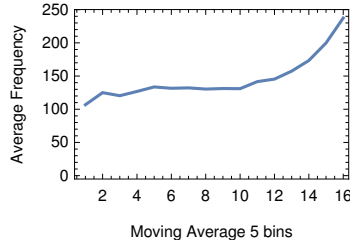

neuron

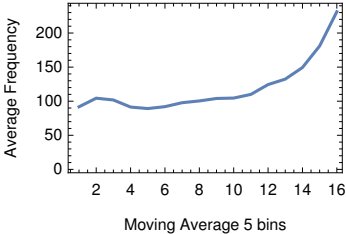

synapse

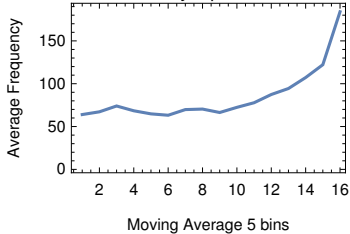

transport

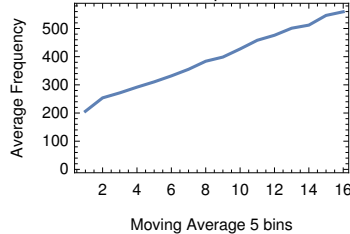

Supplement: supp [file elife-64951-supp-v1.zip]
