# Supplementary material for: Control of tissue development and cell diversity by cell cycle-dependent transcriptional filtering
Source: eLife journal article supplement (doi:10.7554/elife.64951), 2021-07-02

**A**

Avg. Transcript Count per Cell

*X. tropicalis*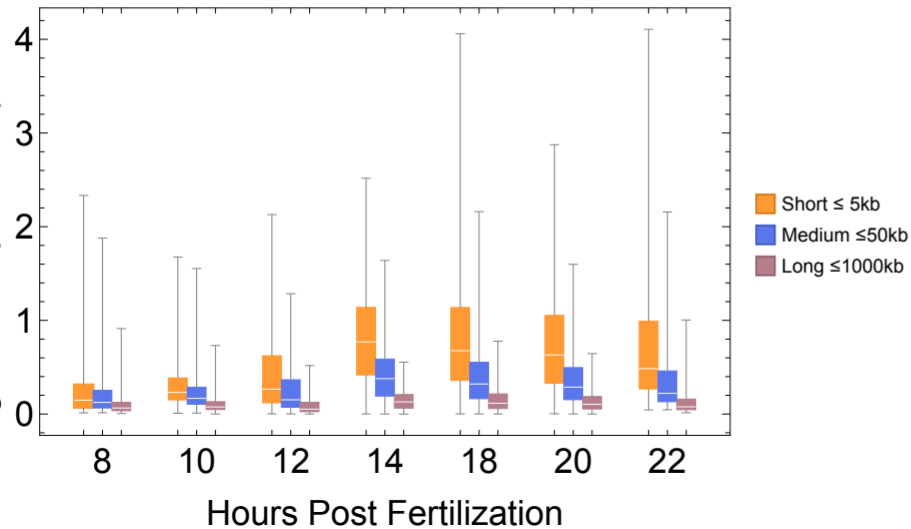**B**

Avg. Transcript Count per Cell

*D. rerio*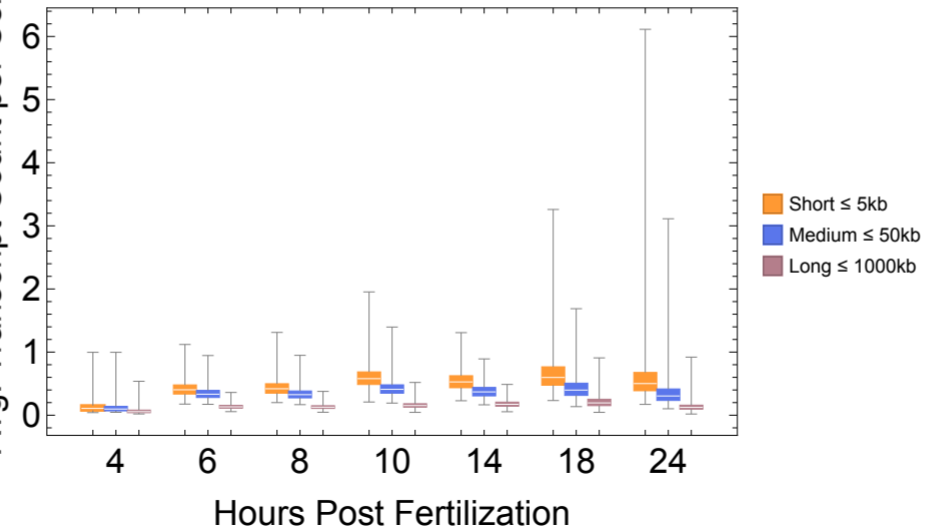**C**

Avg. Transcript Count per Cell

*M. musculus*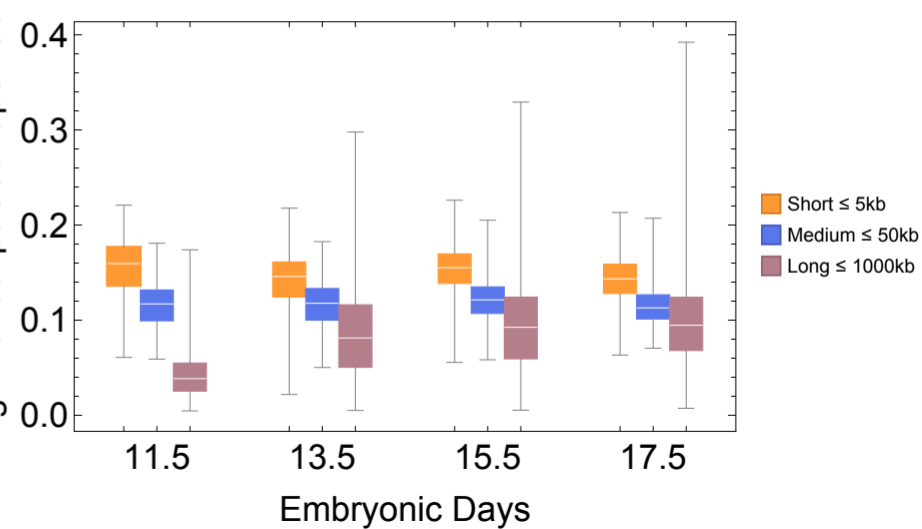

Supplement: supp [file elife-64951-supp-v1.zip]
