# Supplementary material for: Control of tissue development and cell diversity by cell cycle-dependent transcriptional filtering
Source: eLife. 2021 Jul 2;10:e64951. doi: 10.7554/eLife.64951 (PMC8279763; doi:10.7554/eLife.64951)
Supplement: Supplementary file 2. [file elife-64951-supp2.xlsx]

## Sheet: Diveristy_Trans_data_sims--1010
Cell-Cycle-duration	Ploidy	rpol-rate	rpol-initiationdist	L1	LG	G	Iterations	Simulation_Transcriptome_Diversity	Analytical_Solution
1	1	1	0.25	1	10	10	2500000	2	2
2	1	1	0.25	1	10	10	2500000	12	12
3	1	1	0.25	1	10	10	2500000	120	120
4	1	1	0.25	1	10	10	2500000	1680	1680
5	1	1	0.25	1	10	10	2500000	30240	30240
6	1	1	0.25	1	10	10	2500000	664922	665280
7	1	1	0.25	1	10	10	4500000	7014596	17297280
8	1	1	0.25	1	10	10	4500000	8922304	518918400
9	1	1	0.25	1	10	10	4500000	8997862	17643225600
10	1	1	0.25	1	10	10	4500000	8999960	670442572800
1	1	1	0.25	0.1	1	10	634272	427870	456192
2	1	1	0.25	0.1	1	10	2500000	4995820	3129477120
3	1	1	0.25	0.1	1	10	2500000	4999962	338778316800
4	1	1	0.25	0.1	1	10	2500000	4999994	7798494412800
5	1	1	0.25	0.1	1	10	2500000	5000000	74202365952000
6	1	1	0.25	0.1	1	10	2199296	4398592	540369642700800
7	1	1	0.25	0.1	1	10	2500000	5000000	2495450301087740
8	1	1	0.25	0.1	1	10	2500000	5000000	1.04279e+16
9	1	1	0.25	0.1	1	10	2500000	5000000	3.51457e+16
10	1	1	0.25	0.1	1	10	2500000	5000000	1.00374e+17
1	1	1	length-of-gene	1	10	10	3351472	2	2
1	2	1	length-of-gene	1	10	10	2000198	3	3
1	3	1	length-of-gene	1	10	10	2000198	4	4
1	4	1	length-of-gene	1	10	10	2000198	5	5
1	5	1	length-of-gene	1	10	10	2000198	6	6
2	1	1	length-of-gene	1	10	10	3351472	6	6
2	2	1	length-of-gene	1	10	10	2000198	15	15
2	3	1	length-of-gene	1	10	10	2000198	28	28
2	4	1	length-of-gene	1	10	10	2000198	45	45
2	5	1	length-of-gene	1	10	10	2000198	66	66
3	1	1	length-of-gene	1	10	10	3351471	16	16
3	2	1	length-of-gene	1	10	10	2000198	63	63
3	3	1	length-of-gene	1	10	10	2000198	160	160
3	4	1	length-of-gene	1	10	10	2000198	325	325
3	5	1	length-of-gene	1	10	10	2000198	570	576
4	1	1	length-of-gene	1	10	10	3351471	60	60
4	2	1	length-of-gene	1	10	10	2000198	405	405
4	3	1	length-of-gene	1	10	10	2000198	1432	1456
4	4	1	length-of-gene	1	10	10	2000198	3495	3825
4	5	1	length-of-gene	1	10	10	2000198	6666	8316
5	1	1	length-of-gene	1	10	10	3351470	144	144
5	2	1	length-of-gene	1	10	10	2000198	1481	1485
5	3	1	length-of-gene	1	10	10	2000198	6558	7168
5	4	1	length-of-gene	1	10	10	2000198	18017	23625
5	5	1	length-of-gene	1	10	10	2000198	36514	61776
6	1	1	length-of-gene	1	10	10	3351470	672	672
6	2	1	length-of-gene	1	10	10	2000198	11303	12285
6	3	1	length-of-gene	1	10	10	2000198	53320	85120
6	4	1	length-of-gene	1	10	10	2000197	136969	365625
6	5	1	length-of-gene	1	10	10	2000197	255720	1178496
7	3	1	length-of-gene	1	10	10	3351469	1536	1536
7	2	1	length-of-gene	1	10	10	2000197	34685	42525
7	3	1	length-of-gene	1	10	10	2000197	170998	394240
7	4	1	length-of-gene	1	10	10	2000197	412483	2120625
7	5	1	length-of-gene	1	10	10	2000197	721386	8211456
8	1	1	length-of-gene	1	10	10	3351469	6470	6480
8	2	1	length-of-gene	1	10	10	2000197	164987	309825
8	3	1	length-of-gene	1	10	10	2000197	631770	4076800
8	4	1	length-of-gene	1	10	10	2000197	1219875	28400625
8	5	1	length-of-gene	1	10	10	2000197	1773022	135018576
9	1	1	length-of-gene	1	10	10	3351469	18758	19200
9	2	1	length-of-gene	1	10	10	2000197	445575	1454355
9	3	1	length-of-gene	1	10	10	2000197	1303442	26091520
9	4	1	length-of-gene	1	10	10	2000197	2055627	229978125
9	5	1	length-of-gene	1	10	10	2000197	2565388	1322044416
10	1	1	length-of-gene	1	10	10	3351469	67798	76032
10	2	1	length-of-gene	1	10	10	2000197	1063657	9823275
10	3	1	length-of-gene	1	10	10	2000197	2154152	248872960
10	4	1	length-of-gene	1	10	10	2000197	2763531	2833228125
10	5	1	length-of-gene	1	10	10	2000197	3095788	19962049536
1	1	1	length-of-gene	0.05	3	60	3000006	4401506	16094453760
2	1	1	length-of-gene	0.05	3	60	2750005	5148018	1.10341e+21
3	1	1	length-of-gene	0.05	3	60	3000006	5809424	4.99481e+31
4	1	1	length-of-gene	0.05	3	60	3000006	5863188	5.20913e+36
5	1	1	length-of-gene	0.05	3	60	3000006	5897384	3.31608e+41
6	1	1	length-of-gene	0.05	3	60	3000006	5919862	2.92426e+46
7	1	1	length-of-gene	0.05	3	60	3000006	5932388	2.52516e+49
8	1	1	length-of-gene	0.05	3	60	3000006	5942726	4.51606e+52
9	1	1	length-of-gene	0.05	3	60	3000006	5951042	5.34649e+55
10	1	1	length-of-gene	0.05	3	60	3000006	5956490	1.38379e+58
1	1	1	length-of-gene	0.1	1	10	3010006	67262	76032
2	1	1	length-of-gene	0.1	1	10	3010006	1550178	15717240
3	1	1	length-of-gene	0.1	1	10	3010006	3339284	586629120
4	1	1	length-of-gene	0.1	1	10	3010006	4254144	7518079800
5	1	1	length-of-gene	0.1	1	10	3010006	4740012	58487292864
6	1	1	length-of-gene	0.1	1	10	3010006	5025040	320549733504
7	1	1	length-of-gene	0.1	1	10	3010006	5189814	1259308892160
8	1	1	length-of-gene	0.1	1	10	3010006	5337116	4791680380872
9	1	1	length-of-gene	0.1	1	10	3010006	5436480	15569677643520
10	1	1	length-of-gene	0.1	1	10	3010006	5511950	41842784103120
1	1	1	length-of-gene	0.5	3	6	3000006	6	6
1	2	1	length-of-gene	0.5	3	6	2000001	15	15
1	3	1	length-of-gene	0.5	3	6	2000001	28	28
1	4	1	length-of-gene	0.5	3	6	2000001	45	45
1	5	1	length-of-gene	0.5	3	6	2000001	66	66
2	1	1	length-of-gene	0.5	3	6	3000006	60	60
2	2	1	length-of-gene	0.5	3	6	2000001	405	405
2	3	1	length-of-gene	0.5	3	6	2000001	1432	1456
2	4	1	length-of-gene	0.5	3	6	2000001	3499	3825
2	5	1	length-of-gene	0.5	3	6	2000001	6686	8316
3	1	1	length-of-gene	0.5	3	6	3000006	672	672
3	2	1	length-of-gene	0.5	3	6	2000001	11297	12285
3	3	1	length-of-gene	0.5	3	6	2000001	53392	85120
3	4	1	length-of-gene	0.5	3	6	2000001	136511	365625
3	5	1	length-of-gene	0.5	3	6	2000001	256330	1178496
4	1	1	length-of-gene	0.5	3	6	3000006	1620	1620
4	2	1	length-of-gene	0.5	3	6	2000001	26511	34425
4	3	1	length-of-gene	0.5	3	6	2000001	108900	254800
4	4	1	length-of-gene	0.5	3	6	2000001	250457	1136025
4	5	1	length-of-gene	0.5	3	6	2000001	437374	3750516
5	1	1	length-of-gene	0.5	3	6	3000006	4698	4752
5	2	1	length-of-gene	0.5	3	6	2000001	67261	121275
5	3	1	length-of-gene	0.5	3	6	2000001	230330	972160
5	4	1	length-of-gene	0.5	3	6	2000001	472961	4533165
5	5	1	length-of-gene	0.5	3	6	2000001	764104	15402816
6	1	1	length-of-gene	0.5	3	6	3000006	14990	16380
6	2	1	length-of-gene	0.5	3	6	2000001	165681	511875
6	3	1	length-of-gene	0.5	3	6	2000001	470500	4478110
6	4	1	length-of-gene	0.5	3	6	2000001	864923	21928725
6	5	1	length-of-gene	0.5	3	6	2000001	1280664	76880496
7	1	1	length-of-gene	0.5	3	6	3000006	18856	21600
7	2	1	length-of-gene	0.5	3	6	2000001	193435	685125
7	3	1	length-of-gene	0.5	3	6	2000001	534818	6026020
7	4	1	length-of-gene	0.5	3	6	2000001	958965	29590353
7	5	1	length-of-gene	0.5	3	6	2000001	1399834	103916736
8	1	1	length-of-gene	0.5	3	6	3000006	40796	55080
8	2	1	length-of-gene	0.5	3	6	2000001	324393	1943865
8	3	1	length-of-gene	0.5	3	6	2000001	803694	17836000
8	4	1	length-of-gene	0.5	3	6	2000001	1336763	89594505
8	5	1	length-of-gene	0.5	3	6	2000001	1832712	319134816
9	1	1	length-of-gene	0.5	3	6	3000006	66846	106400
9	2	1	length-of-gene	0.5	3	6	2000001	451647	4030299
9	3	1	length-of-gene	0.5	3	6	2000001	1037918	38038000
9	4	1	length-of-gene	0.5	3	6	2000001	1635959	193999325
9	5	1	length-of-gene	0.5	3	6	2000001	2138512	697622016
10	1	1	length-of-gene	0.5	3	6	2750005	99834	194040
10	2	1	length-of-gene	0.5	3	6	2000001	590323	7756749
10	3	1	length-of-gene	0.5	3	6	2000001	1272276	74732320
10	4	1	length-of-gene	0.5	3	6	2000001	1903907	385319025
10	5	1	length-of-gene	0.5	3	6	2000001	2395506	1394973216
