# Supplementary material for: Control of tissue development and cell diversity by cell cycle-dependent transcriptional filtering
Source: eLife. 2021 Jul 2;10:e64951. doi: 10.7554/eLife.64951 (PMC8279763; doi:10.7554/eLife.64951)
Supplement: Supplementary file 4. [file elife-64951-supp4.xlsx]

## Sheet: computed_and_manual_themes_no_w
EnrichmentMap::Name	EnrichmentMap::GS_DESCR	EnrichmentMap::gs_size	EnrichmentMap::pvalue (Dataset 1)	EnrichmentMap::fdr_qvalue (Dataset 1)	EnrichmentMap::NES (Dataset 1)	cluster_num	Manually defined theme	theme_group	autoannot_theme
3-PHOSPHOINOSITIDE BIOSYNTHESIS%HUMANCYC%PWY-6352	3-phosphoinositide biosynthesis	26	0.0018	0.0049	-1.9513	15	cytoskeleton	4	synthesis pips phosphatidylinositol
5HT2 TYPE RECEPTOR MEDIATED SIGNALING PATHWAY%PANTHER PATHWAY%P04374	5HT2 type receptor mediated signaling pathway	46	0	0.0053	-1.9403	88	growth regulation	3	thyrotropin releasing hormone
ACIDIC AMINO ACID TRANSPORT%GOBP%GO:0015800	acidic amino acid transport	42	0	0.0028	-2.0148	131	cytoskeleton	4	c4 dicarboxylate acidic
ACTIN CYTOSKELETON REORGANIZATION%GOBP%GO:0031532	actin cytoskeleton reorganization	62	0	0.0002	-2.2785	213	cytoskeleton	4	actin cytoskeleton reorganization
ACTIN FILAMENT BUNDLE ASSEMBLY%GOBP%GO:0051017	actin filament bundle assembly	51	0	0.0022	-2.0476	114	cytoskeleton	4	actin filament bundle
ACTIN FILAMENT BUNDLE ORGANIZATION%GOBP%GO:0061572	actin filament bundle organization	54	0	0.0015	-2.0889	114	cytoskeleton	4	actin filament bundle
ACTIN FILAMENT-BASED MOVEMENT%GOBP%GO:0030048	actin filament-based movement	109	0	0.0005	-2.2004	7	muscle control	8	action contraction cardiac
ACTIN FILAMENT-BASED TRANSPORT%GOBP%GO:0099515	actin filament-based transport	21	0	0.0003	-2.2741	44	cytoskeleton	4	transport based cytoskeletal
ACTIN POLYMERIZATION OR DEPOLYMERIZATION%GOBP%GO:0008154	actin polymerization or depolymerization	47	0.0017	0.0077	-1.8905	201	cytoskeleton	4	actin polymerization depolymerization
ACTION POTENTIAL%GOBP%GO:0001508	action potential	75	0	0	-2.5933	7	muscle control	8	action contraction cardiac
ACTIVATION OF GTPASE ACTIVITY%GOBP%GO:0090630	activation of GTPase activity	95	0	0.0013	-2.1026	224	neural development	7	activation gtpase activity
ACTIVATION OF NMDA RECEPTORS AND POSTSYNAPTIC EVENTS%REACTOME DATABASE ID RELEASE 72%442755	Activation of NMDA receptors and postsynaptic events	70	0	0.0001	-2.37	9	neural development	7	glutamate receptors nmda
ACTIVATION OF PROTEIN KINASE A ACTIVITY%GOBP%GO:0034199	activation of protein kinase A activity	17	0.0018	0.0033	-1.999	2	muscle control	8	pka glucagon endothelin
ACTIVATION OF THE MRNA UPON BINDING OF THE CAP-BINDING COMPLEX AND EIFS, AND SUBSEQUENT BINDING TO 43S%REACTOME DATABASE ID RELEASE 72%72662	Activation of the mRNA upon binding of the cap-binding complex and eIFs, and subsequent binding to 43S	60	0	0	2.4984	1	protein translation	13	complex decay targeting
ACTOMYOSIN STRUCTURE ORGANIZATION%GOBP%GO:0031032	actomyosin structure organization	94	0	0.0002	-2.3091	202	cytoskeleton	4	actomyosin structure organization
ADHERENS JUNCTION ORGANIZATION%GOBP%GO:0034332	adherens junction organization	70	0	0	-2.6668	16	ECM	9	nephrin neph1 junction
ADHERENS JUNCTIONS INTERACTIONS%REACTOME%R-HSA-418990.2	Adherens junctions interactions	30	0	0	-2.4431	16	ECM	9	nephrin neph1 junction
AEROBIC ELECTRON TRANSPORT CHAIN%GOBP%GO:0019646	aerobic electron transport chain	20	0	0.0023	2.1154	13	mitochondrion	10	atp electron respiratory
ALPHA6BETA4INTEGRIN%IOB%ALPHA6BETA4INTEGRIN	Alpha6Beta4Integrin	68	0	0.0011	-2.1308	14	ECM	9	beta1 ecm proteoglycans
ALPHA6BETA4INTEGRIN%NETPATH%ALPHA6BETA4INTEGRIN	Alpha6Beta4Integrin	74	0	0.002	-2.0545	14	ECM	9	beta1 ecm proteoglycans
ALZHEIMER DISEASE-AMYLOID SECRETASE PATHWAY%PANTHER PATHWAY%P00003	Alzheimer disease-amyloid secretase pathway	63	0	0.0003	-2.2667	206	neural development	7	alzheimer disease amyloid
AMYLOID-BETA CLEARANCE%GOBP%GO:0097242	amyloid-beta clearance	22	0	0.0035	-1.9904	163	neural development	7	amyloid beta clearance
ANCHORING OF THE BASAL BODY TO THE PLASMA MEMBRANE%REACTOME DATABASE ID RELEASE 72%5620912	Anchoring of the basal body to the plasma membrane	95	0	0.0086	-1.8774	52	cytoskeleton	4	basal body docking
ANGIOGENESIS%PANTHER PATHWAY%P00005	Angiogenesis	154	0	0.0036	-1.9855	94	growth regulation	3	pdgf signaling pathway
ANGIOPOIETIN RECEPTOR TIE2-MEDIATED SIGNALING%PATHWAY INTERACTION DATABASE NCI-NATURE CURATED DATA%ANGIOPOIETIN RECEPTOR TIE2-MEDIATED SIGNALING	Angiopoietin receptor Tie2-mediated signaling	49	0	0.0026	-2.0259	134	growth regulation	3	angiopoietin tie2 mediated
ANION TRANSMEMBRANE TRANSPORT%GOBP%GO:0098656	anion transmembrane transport	145	0	0.0003	-2.2572	29	growth regulation	3	anion chloride transmembrane
ANTERIOR/POSTERIOR PATTERN SPECIFICATION%GOBP%GO:0009952	anterior/posterior pattern specification	91	0	0.0015	2.1559	191	development	2	anterior posterior pattern
ANTIBACTERIAL HUMORAL RESPONSE%GOBP%GO:0019731	antibacterial humoral response	49	0	0	2.7569	20	immune	6	humoral response defense
ANTIGEN ACTIVATES B CELL RECEPTOR (BCR) LEADING TO GENERATION OF SECOND MESSENGERS%REACTOME%R-HSA-983695.3	Antigen activates B Cell Receptor (BCR) leading to generation of second messengers	36	0	0.0014	-2.0945	6	neural development	7	leishmania phagocytosis engulfment
ANTIMICROBIAL HUMORAL IMMUNE RESPONSE MEDIATED BY ANTIMICROBIAL PEPTIDE%GOBP%GO:0061844	antimicrobial humoral immune response mediated by antimicrobial peptide	70	0	0	3.2637	20	immune	6	humoral response defense
ANTIMICROBIAL HUMORAL RESPONSE%GOBP%GO:0019730	antimicrobial humoral response	125	0	0	3.3359	20	immune	6	humoral response defense
ANTIMICROBIAL PEPTIDES%REACTOME DATABASE ID RELEASE 72%6803157	Antimicrobial peptides	94	0	0	3.3184	90	immune	6	beta defensins peptides
APOPTOTIC CLEAVAGE OF CELLULAR PROTEINS%REACTOME%R-HSA-111465.3	Apoptotic cleavage of cellular proteins	37	0	0.0004	-2.2477	155	cell death	12	apoptotic phase cleavage
APOPTOTIC EXECUTION PHASE%REACTOME DATABASE ID RELEASE 72%75153	Apoptotic execution phase	51	0	0.001	-2.1378	155	cell death	12	apoptotic phase cleavage
ARF6 SIGNALING EVENTS%PATHWAY INTERACTION DATABASE NCI-NATURE CURATED DATA%ARF6 SIGNALING EVENTS	Arf6 signaling events	35	0	0.006	-1.9232	129	cytoskeleton	4	arf6 signaling events
ARF6 TRAFFICKING EVENTS%PATHWAY INTERACTION DATABASE NCI-NATURE CURATED DATA%ARF6 TRAFFICKING EVENTS	Arf6 trafficking events	47	0	0.0028	-2.0177	140	cytoskeleton	4	arf6 trafficking pathway
ASSEMBLY AND CELL SURFACE PRESENTATION OF NMDA RECEPTORS%REACTOME%R-HSA-9609736.3	Assembly and cell surface presentation of NMDA receptors	25	0.0054	0.0075	-1.8938	9	neural development	7	glutamate receptors nmda
ASSEMBLY OF COLLAGEN FIBRILS AND OTHER MULTIMERIC STRUCTURES%REACTOME%R-HSA-2022090.3	Assembly of collagen fibrils and other multimeric structures	56	0	0.0029	-2.0115	43	ECM	9	assembly collagen formation
ATP SYNTHESIS COUPLED ELECTRON TRANSPORT%GOBP%GO:0042773	ATP synthesis coupled electron transport	82	0	0.0001	2.4043	13	mitochondrion	10	atp electron respiratory
AXON EXTENSION%GOBP%GO:0048675	axon extension	24	0.0018	0.0007	-2.1726	39	neural development	7	developmental growth morphogenesis
AXON GUIDANCE MEDIATED BY NETRIN%PANTHER PATHWAY%P00009	Axon guidance mediated by netrin	30	0	0.0001	-2.3516	35	neural development	7	motor guidance slit
AXON GUIDANCE MEDIATED BY SEMAPHORINS%PANTHER PATHWAY%P00007	Axon guidance mediated by semaphorins	19	0	0.0047	-1.9589	48	growth regulation	3	paks semaphorin interactions
AXON GUIDANCE MEDIATED BY SLIT ROBO%PANTHER PATHWAY%P00008	Axon guidance mediated by Slit Robo	18	0.0057	0.005	-1.9469	35	neural development	7	motor guidance slit
AXON GUIDANCE%GOBP%GO:0007411	axon guidance	198	0	0	-2.8927	35	neural development	7	motor guidance slit
AXONEME ASSEMBLY%GOBP%GO:0035082	axoneme assembly	59	0	0.0008	-2.1674	84	cytoskeleton	4	axoneme assembly microtubule
B CELL PROLIFERATION%GOBP%GO:0042100	B cell proliferation	33	0	0	2.569	5	immune	6	type interferon proliferation
BCR%NETPATH%BCR	BCR	160	0	0.0031	-2.0053	3	immune	6	scf kit epo
BDNF%IOB%BDNF	BDNF	47	0	0.0004	-2.2134	120	neural development	7	bdnf
BETA DEFENSINS%REACTOME DATABASE ID RELEASE 72%1461957	Beta defensins	40	0	0	2.9273	90	immune	6	beta defensins peptides
BETA1 INTEGRIN CELL SURFACE INTERACTIONS%PATHWAY INTERACTION DATABASE NCI-NATURE CURATED DATA%BETA1 INTEGRIN CELL SURFACE INTERACTIONS	Beta1 integrin cell surface interactions	66	0	0.0005	-2.2112	14	ECM	9	beta1 ecm proteoglycans
BILE ACID AND BILE SALT METABOLISM%REACTOME%R-HSA-194068.1	Bile acid and bile salt metabolism	42	0	0.0059	-1.9237	117	immune	6	recycling bile metabolism
BIOCARTA_AGR_PATHWAY%MSIGDB_C2%BIOCARTA_AGR_PATHWAY	BIOCARTA_AGR_PATHWAY	36	0	0.0015	-2.085	12	ECM	9	hepatocyte vegfr3 angiogenesis
BIOCARTA_AT1R_PATHWAY%MSIGDB_C2%BIOCARTA_AT1R_PATHWAY	BIOCARTA_AT1R_PATHWAY	33	0.0018	0.0025	-2.0309	34	growth regulation	3	egf pathway biopeptides
BIOCARTA_BIOPEPTIDES_PATHWAY%MSIGDB_C2%BIOCARTA_BIOPEPTIDES_PATHWAY	BIOCARTA_BIOPEPTIDES_PATHWAY	42	0	0.0008	-2.1628	34	growth regulation	3	egf pathway biopeptides
BIOCARTA_CCR3_PATHWAY%MSIGDB_C2%BIOCARTA_CCR3_PATHWAY	BIOCARTA_CCR3_PATHWAY	23	0	0.0064	-1.9138	12	ECM	9	hepatocyte vegfr3 angiogenesis
BIOCARTA_CREB_PATHWAY%MSIGDB_C2%BIOCARTA_CREB_PATHWAY	BIOCARTA_CREB_PATHWAY	27	0	0.0011	-2.1307	9	neural development	7	glutamate receptors nmda
BIOCARTA_CXCR4_PATHWAY%MSIGDB_C2%BIOCARTA_CXCR4_PATHWAY	BIOCARTA_CXCR4_PATHWAY	24	0.0036	0.0051	-1.9455	96	immune	6	sppa pathway cxcr4
BIOCARTA_CYTOKINE_PATHWAY%MSIGDB_C2%BIOCARTA_CYTOKINE_PATHWAY	BIOCARTA_CYTOKINE_PATHWAY	21	0	0.0011	2.1824	59	immune	6	dc inflam cytokine
BIOCARTA_DC_PATHWAY%MSIGDB_C2%BIOCARTA_DC_PATHWAY	BIOCARTA_DC_PATHWAY	22	0	0.0009	2.2021	59	immune	6	dc inflam cytokine
BIOCARTA_EGF_PATHWAY%MSIGDB_C2%BIOCARTA_EGF_PATHWAY	BIOCARTA_EGF_PATHWAY	31	0	0.004	-1.9764	34	growth regulation	3	egf pathway biopeptides
BIOCARTA_FCER1_PATHWAY%MSIGDB_C2%BIOCARTA_FCER1_PATHWAY	BIOCARTA_FCER1_PATHWAY	38	0.0017	0.0095	-1.8651	3	immune	6	scf kit epo
BIOCARTA_GPCR_PATHWAY%MSIGDB_C2%BIOCARTA_GPCR_PATHWAY	BIOCARTA_GPCR_PATHWAY	34	0.0039	0.0069	-1.904	9	neural development	7	glutamate receptors nmda
BIOCARTA_IL7_PATHWAY%MSIGDB_C2%BIOCARTA_IL7_PATHWAY	BIOCARTA_IL7_PATHWAY	17	0.0018	0.0027	-2.0217	3	immune	6	scf kit epo
BIOCARTA_INFLAM_PATHWAY%MSIGDB_C2%BIOCARTA_INFLAM_PATHWAY	BIOCARTA_INFLAM_PATHWAY	29	0	0.0014	2.1617	59	immune	6	dc inflam cytokine
BIOCARTA_MET_PATHWAY%MSIGDB_C2%BIOCARTA_MET_PATHWAY	BIOCARTA_MET_PATHWAY	37	0	0.0035	-1.9896	159	growth regulation	3	met pathway
BIOCARTA_MYOSIN_PATHWAY%MSIGDB_C2%BIOCARTA_MYOSIN_PATHWAY	BIOCARTA_MYOSIN_PATHWAY	31	0	0.0003	-2.2637	23	cell death	12	signals death jnk
BIOCARTA_NOS1_PATHWAY%MSIGDB_C2%BIOCARTA_NOS1_PATHWAY	BIOCARTA_NOS1_PATHWAY	21	0.0018	0.005	-1.947	9	neural development	7	glutamate receptors nmda
BIOCARTA_PAR1_PATHWAY%MSIGDB_C2%BIOCARTA_PAR1_PATHWAY	BIOCARTA_PAR1_PATHWAY	37	0	0	-2.4233	23	cell death	12	signals death jnk
BIOCARTA_PDGF_PATHWAY%MSIGDB_C2%BIOCARTA_PDGF_PATHWAY	BIOCARTA_PDGF_PATHWAY	32	0.0051	0.0081	-1.8842	34	growth regulation	3	egf pathway biopeptides
BIOCARTA_SPPA_PATHWAY%MSIGDB_C2%BIOCARTA_SPPA_PATHWAY	BIOCARTA_SPPA_PATHWAY	22	0	0.0011	-2.1313	96	immune	6	sppa pathway cxcr4
BIOCARTA_STEM_PATHWAY%MSIGDB_C2%BIOCARTA_STEM_PATHWAY	BIOCARTA_STEM_PATHWAY	15	0	0.0034	2.0712	59	immune	6	dc inflam cytokine
BIOCARTA_TGFB_PATHWAY%MSIGDB_C2%BIOCARTA_TGFB_PATHWAY	BIOCARTA_TGFB_PATHWAY	19	0.0038	0.0093	-1.8668	36	growth regulation	3	tgf tgfbr tgfb
C4-DICARBOXYLATE TRANSPORT%GOBP%GO:0015740	C4-dicarboxylate transport	20	0	0.0028	-2.0171	131	cytoskeleton	4	c4 dicarboxylate acidic
CA-DEPENDENT EVENTS%REACTOME DATABASE ID RELEASE 72%111996	Ca-dependent events	36	0	0	-2.4524	2	muscle control	8	pka glucagon endothelin
CA2+ PATHWAY%REACTOME DATABASE ID RELEASE 72%4086398	Ca2+ pathway	58	0.0018	0.0077	-1.8919	112	muscle control	8	calcium modulating ca2
CADHERIN SIGNALING PATHWAY%PANTHER PATHWAY%P00012	Cadherin signaling pathway	150	0	0.0011	-2.1267	16	ECM	9	nephrin neph1 junction
CALCIUM ION IMPORT%GOBP%GO:0070509	calcium ion import	39	0	0.0001	-2.3984	8	muscle control	8	calcium inositol phosphate
CALCIUM ION TRANSMEMBRANE IMPORT INTO CYTOSOL%GOBP%GO:0097553	calcium ion transmembrane import into cytosol	62	0	0.003	-2.0089	8	muscle control	8	calcium inositol phosphate
CALCIUM ION TRANSMEMBRANE TRANSPORT%GOBP%GO:0070588	calcium ion transmembrane transport	126	0	0	-2.4568	8	muscle control	8	calcium inositol phosphate
CALCIUM ION TRANSPORT INTO CYTOSOL%GOBP%GO:0060402	calcium ion transport into cytosol	72	0	0.0011	-2.1309	8	muscle control	8	calcium inositol phosphate
CALCIUM ION TRANSPORT%GOBP%GO:0006816	calcium ion transport	182	0	0	-2.4177	8	muscle control	8	calcium inositol phosphate
CALMODULIN INDUCED EVENTS%REACTOME DATABASE ID RELEASE 72%111933	Calmodulin induced events	34	0	0.0001	-2.333	2	muscle control	8	pka glucagon endothelin
CAM PATHWAY%REACTOME%R-HSA-111997.1	CaM pathway	34	0	0.0001	-2.3285	2	muscle control	8	pka glucagon endothelin
CAP-DEPENDENT TRANSLATION INITIATION%REACTOME DATABASE ID RELEASE 72%72737	Cap-dependent Translation Initiation	120	0	0	3.0549	1	protein translation	13	complex decay targeting
CARDIAC CONDUCTION%GOBP%GO:0061337	cardiac conduction	90	0	0.0028	-2.0175	7	muscle control	8	action contraction cardiac
CARDIAC CONDUCTION%REACTOME DATABASE ID RELEASE 72%5576891	Cardiac conduction	134	0	0.0002	-2.3119	7	muscle control	8	action contraction cardiac
CARDIAC MUSCLE CELL ACTION POTENTIAL INVOLVED IN CONTRACTION%GOBP%GO:0086002	cardiac muscle cell action potential involved in contraction	35	0	0.0038	-1.9821	7	muscle control	8	action contraction cardiac
CARDIAC MUSCLE CELL ACTION POTENTIAL%GOBP%GO:0086001	cardiac muscle cell action potential	47	0	0.0011	-2.12	7	muscle control	8	action contraction cardiac
CARDIAC MUSCLE CELL CONTRACTION%GOBP%GO:0086003	cardiac muscle cell contraction	36	0.0018	0.0026	-2.0271	7	muscle control	8	action contraction cardiac
CD28 CO-STIMULATION%REACTOME%R-HSA-389356.1	CD28 co-stimulation	31	0	0.0006	-2.1881	31	growth regulation	3	vegfa vegfr2 vegfr1
CDC42 SIGNALING EVENTS%PATHWAY INTERACTION DATABASE NCI-NATURE CURATED DATA%CDC42 SIGNALING EVENTS	CDC42 signaling events	70	0	0.0007	-2.1836	136	transcription	5	cdc42 signaling events
CELL ADHESION MEDIATED BY INTEGRIN%GOBP%GO:0033627	cell adhesion mediated by integrin	23	0.0018	0.0062	-1.9176	38	ECM	9	integrin family cs
CELL CHEMOTAXIS%GOBP%GO:0060326	cell chemotaxis	173	0	0.0013	2.1708	10	immune	6	chemokine monocyte chemotaxis
CELL DEATH SIGNALLING VIA NRAGE, NRIF AND NADE%REACTOME DATABASE ID RELEASE 72%204998	Cell death signalling via NRAGE, NRIF and NADE	76	0	0.0001	-2.3667	23	cell death	12	signals death jnk
CELL GROWTH%GOBP%GO:0016049	cell growth	46	0	0.0001	-2.3926	39	neural development	7	developmental growth morphogenesis
CELL JUNCTION ASSEMBLY%GOBP%GO:0034329	cell junction assembly	164	0	0.0082	-1.8835	16	ECM	9	nephrin neph1 junction
CELL JUNCTION ORGANIZATION%GOBP%GO:0034330	cell junction organization	197	0	0.0046	-1.9593	16	ECM	9	nephrin neph1 junction
CELL JUNCTION ORGANIZATION%REACTOME DATABASE ID RELEASE 72%446728	Cell junction organization	86	0	0.0074	-1.8962	16	ECM	9	nephrin neph1 junction
CELL KILLING%GOBP%GO:0001906	cell killing	71	0	0	2.5113	30	immune	6	organism cells killing
CELL-CELL ADHESION MEDIATED BY CADHERIN%GOBP%GO:0044331	cell-cell adhesion mediated by cadherin	27	0	0	-2.4318	16	ECM	9	nephrin neph1 junction
CELL-CELL ADHESION VIA PLASMA-MEMBRANE ADHESION MOLECULES%GOBP%GO:0098742	cell-cell adhesion via plasma-membrane adhesion molecules	163	0	0.0011	-2.1133	62	ECM	9	plasma adhesion molecules
CELL-CELL COMMUNICATION%REACTOME%R-HSA-1500931.4	Cell-Cell communication	118	0	0.0002	-2.2876	16	ECM	9	nephrin neph1 junction
CELL-SUBSTRATE ADHERENS JUNCTION ASSEMBLY%GOBP%GO:0007045	cell-substrate adherens junction assembly	20	0	0.0067	-1.9095	16	ECM	9	nephrin neph1 junction
CELL-SUBSTRATE ADHESION%GOBP%GO:0031589	cell-substrate adhesion	139	0	0.002	-2.0517	106	ECM	9	substrate dependent spreading
CELLULAR BIOGENIC AMINE CATABOLIC PROCESS%GOBP%GO:0042402	cellular biogenic amine catabolic process	19	0.0035	0.0069	-1.904	153	circadian rhythm	21	biogenic amine indolalkylamine
CELLULAR RESPONSE TO ALCOHOL%GOBP%GO:0097306	cellular response to alcohol	49	0	0.0004	-2.246	115	environment sensing	11	cellular response alcohol
CELLULAR RESPONSE TO AMMONIUM ION%GOBP%GO:0071242	cellular response to ammonium ion	47	0	0.0072	-1.8995	146	environment sensing	11	cellular ammonium ion
CELLULAR RESPONSE TO AMYLOID-BETA%GOBP%GO:1904646	cellular response to amyloid-beta	35	0	0.0097	-1.8608	126	neural development	7	cellular amyloid beta
CELLULAR RESPONSE TO CADMIUM ION%GOBP%GO:0071276	cellular response to cadmium ion	27	0	0.0005	2.2608	26	environment sensing	11	zinc copper cadmium
CELLULAR RESPONSE TO CALCIUM ION%GOBP%GO:0071277	cellular response to calcium ion	67	0	0.002	-2.0515	97	muscle control	8	cellular calcium ion
CELLULAR RESPONSE TO CHEMOKINE%GOBP%GO:1990869	cellular response to chemokine	65	0	0	2.5235	10	immune	6	chemokine monocyte chemotaxis
CELLULAR RESPONSE TO COPPER ION%GOBP%GO:0071280	cellular response to copper ion	19	0	0	2.4864	26	environment sensing	11	zinc copper cadmium
CELLULAR RESPONSE TO GLUCAGON STIMULUS%GOBP%GO:0071377	cellular response to glucagon stimulus	18	0.0055	0.0093	-1.8681	2	muscle control	8	pka glucagon endothelin
CELLULAR RESPONSE TO NERVE GROWTH FACTOR STIMULUS%GOBP%GO:1990090	cellular response to nerve growth factor stimulus	22	0	0.0043	-1.9679	133	neural development	7	nerve factor stimulus
CELLULAR RESPONSE TO TYPE I INTERFERON%GOBP%GO:0071357	cellular response to type I interferon	64	0	0.0002	2.3193	5	immune	6	type interferon proliferation
CELLULAR RESPONSE TO ZINC ION%GOBP%GO:0071294	cellular response to zinc ion	18	0	0.0001	2.3873	26	environment sensing	11	zinc copper cadmium
CELLULAR ZINC ION HOMEOSTASIS%GOBP%GO:0006882	cellular zinc ion homeostasis	29	0	0.0017	2.1459	26	environment sensing	11	zinc copper cadmium
CENTRAL NERVOUS SYSTEM NEURON DEVELOPMENT%GOBP%GO:0021954	central nervous system neuron development	38	0	0.0005	-2.2113	18	neural development	7	forebrain neurons development
CENTRAL NERVOUS SYSTEM NEURON DIFFERENTIATION%GOBP%GO:0021953	central nervous system neuron differentiation	78	0	0.0027	-2.0213	18	neural development	7	forebrain neurons development
CEREBRAL CORTEX CELL MIGRATION%GOBP%GO:0021795	cerebral cortex cell migration	17	0	0.0015	-2.0888	18	neural development	7	forebrain neurons development
CEREBRAL CORTEX DEVELOPMENT%GOBP%GO:0021987	cerebral cortex development	44	0	0	-2.4609	18	neural development	7	forebrain neurons development
CGMP EFFECTS%REACTOME%R-HSA-418457.1	cGMP effects	15	0	0.0002	-2.2895	77	immune	6	nitric platelet homeostasis
CHEMOKINE RECEPTORS BIND CHEMOKINES%REACTOME%R-HSA-380108.3	Chemokine receptors bind chemokines	58	0	0	2.8701	10	immune	6	chemokine monocyte chemotaxis
CHEMOKINE-MEDIATED SIGNALING PATHWAY%GOBP%GO:0070098	chemokine-mediated signaling pathway	58	0	0	2.7712	10	immune	6	chemokine monocyte chemotaxis
CHLORIDE TRANSMEMBRANE TRANSPORT%GOBP%GO:1902476	chloride transmembrane transport	43	0	0	-2.719	29	growth regulation	3	anion chloride transmembrane
CHLORIDE TRANSPORT%GOBP%GO:0006821	chloride transport	69	0	0	-2.4386	29	growth regulation	3	anion chloride transmembrane
CHROMATIN MODIFYING ENZYMES%REACTOME%R-HSA-3247509.4	Chromatin modifying enzymes	274	0	0.0006	-2.1853	55	transcription	5	pkmts chromatin organization
CHROMATIN ORGANIZATION%REACTOME DATABASE ID RELEASE 72%4839726	Chromatin organization	274	0	0.0006	-2.1966	55	transcription	5	pkmts chromatin organization
CILIARY BASAL BODY-PLASMA MEMBRANE DOCKING%GOBP%GO:0097711	ciliary basal body-plasma membrane docking	94	0	0.0095	-1.8649	52	cytoskeleton	4	basal body docking
CILIUM ASSEMBLY%REACTOME DATABASE ID RELEASE 72%5617833	Cilium Assembly	186	0	0.0055	-1.934	52	cytoskeleton	4	basal body docking
CILIUM MOVEMENT%GOBP%GO:0003341	cilium movement	52	0	0.0003	-2.2556	84	cytoskeleton	4	axoneme assembly microtubule
CIRCADIAN CLOCK%REACTOME DATABASE ID RELEASE 72%400253	Circadian Clock	67	0.0016	0.0057	-1.9308	76	circadian rhythm	21	rora activates pparalpha
CLASS C 3 (METABOTROPIC GLUTAMATE PHEROMONE RECEPTORS)%REACTOME%R-HSA-420499.1	Class C 3 (Metabotropic glutamate pheromone receptors)	39	0	0	2.515	22	environment sensing	11	chemical sensory perception
CLATHRIN-DEPENDENT ENDOCYTOSIS%GOBP%GO:0072583	clathrin-dependent endocytosis	25	0	0.0002	-2.2941	185	cytoskeleton	4	clathrin dependent endocytosis
COLLAGEN BIOSYNTHESIS AND MODIFYING ENZYMES%REACTOME%R-HSA-1650814.3	Collagen biosynthesis and modifying enzymes	67	0	0	-2.7458	43	ECM	9	assembly collagen formation
COLLAGEN CHAIN TRIMERIZATION%REACTOME%R-HSA-8948216.2	Collagen chain trimerization	44	0	0	-2.8423	43	ECM	9	assembly collagen formation
COLLAGEN FORMATION%REACTOME DATABASE ID RELEASE 72%1474290	Collagen formation	89	0	0	-2.4476	43	ECM	9	assembly collagen formation
CONSTITUTIVE SIGNALING BY ABERRANT PI3K IN CANCER%REACTOME%R-HSA-2219530.1	Constitutive Signaling by Aberrant PI3K in Cancer	62	0	0.0057	-1.9304	24	growth regulation	3	pi3k cancer erbb4
COREGULATION OF ANDROGEN RECEPTOR ACTIVITY%PATHWAY INTERACTION DATABASE NCI-NATURE CURATED DATA%COREGULATION OF ANDROGEN RECEPTOR ACTIVITY	Coregulation of Androgen receptor activity	60	0.0016	0.0072	-1.8985	142	growth regulation	3	coregulation androgen receptor
CORNIFICATION%GOBP%GO:0070268	cornification	111	0	0	2.583	81	immune	6	formation cornified envelope
COTRANSLATIONAL PROTEIN TARGETING TO MEMBRANE%GOBP%GO:0006613	cotranslational protein targeting to membrane	96	0	0	3.1498	1	protein translation	13	complex decay targeting
CREB1 PHOSPHORYLATION THROUGH NMDA RECEPTOR-MEDIATED ACTIVATION OF RAS SIGNALING%REACTOME%R-HSA-442742.2	CREB1 phosphorylation through NMDA receptor-mediated activation of RAS signaling	26	0	0.0048	-1.9531	9	neural development	7	glutamate receptors nmda
CRMPS IN SEMA3A SIGNALING%REACTOME%R-HSA-399956.1	CRMPs in Sema3A signaling	16	0	0.0047	-1.9574	48	growth regulation	3	paks semaphorin interactions
CXCR4%IOB%CXCR4	CXCR4	95	0	0.0077	-1.8908	58	immune	6	ifn gamma tslp
CYTOPLASMIC MICROTUBULE ORGANIZATION%GOBP%GO:0031122	cytoplasmic microtubule organization	55	0	0.0004	-2.2352	176	cytoskeleton	4	cytoplasmic microtubule organization
CYTOPLASMIC TRANSLATION%GOBP%GO:0002181	cytoplasmic translation	59	0	0	2.6783	1	protein translation	13	complex decay targeting
CYTOSKELETON-DEPENDENT INTRACELLULAR TRANSPORT%GOBP%GO:0030705	cytoskeleton-dependent intracellular transport	170	0	0.0003	-2.2641	44	cytoskeleton	4	transport based cytoskeletal
CYTOSOLIC CALCIUM ION TRANSPORT%GOBP%GO:0060401	cytosolic calcium ion transport	83	0	0.0006	-2.1821	8	muscle control	8	calcium inositol phosphate
CYTOSOLIC TRANSPORT%GOBP%GO:0016482	cytosolic transport	135	0	0.0026	-2.0234	182	cytoskeleton	4	cytosolic transport
D-<I>MYO< I>-INOSITOL-5-PHOSPHATE METABOLISM%HUMANCYC%PWY-6367	D-<i>myo< i>-inositol-5-phosphate metabolism	19	0.0018	0.005	-1.9485	8	muscle control	8	calcium inositol phosphate
DAG AND IP3 SIGNALING%REACTOME DATABASE ID RELEASE 72%1489509	DAG and IP3 signaling	40	0	0	-2.4641	2	muscle control	8	pka glucagon endothelin
DEATH RECEPTOR SIGNALLING%REACTOME%R-HSA-73887.4	Death Receptor Signalling	139	0	0.0036	-1.9872	23	cell death	12	signals death jnk
DEFECTIVE B3GALTL CAUSES PETERS-PLUS SYNDROME (PPS)%REACTOME%R-HSA-5083635.1	Defective B3GALTL causes Peters-plus syndrome (PpS)	36	0	0	-2.4892	63	neural development	7	glycosylation domain proteins
DEFECTIVE TPR MAY CONFER SUSCEPTIBILITY TOWARDS THYROID PAPILLARY CARCINOMA (TPC)%REACTOME DATABASE ID RELEASE 72%5619107	Defective TPR may confer susceptibility towards thyroid papillary carcinoma (TPC)	28	0	0.0015	-2.0901	4	transcription	5	mature sumoylation ubiquitinylation
DEFECTS IN VITAMIN AND COFACTOR METABOLISM%REACTOME DATABASE ID RELEASE 72%3296482	Defects in vitamin and cofactor metabolism	22	0.0017	0.0098	-1.8588	199	development	2	defects vitamin cofactor
DEFENSE RESPONSE TO BACTERIUM%GOBP%GO:0042742	defense response to bacterium	228	0	0	2.9353	20	immune	6	humoral response defense
DEFENSE RESPONSE TO FUNGUS%GOBP%GO:0050832	defense response to fungus	19	0	0.0004	2.275	20	immune	6	humoral response defense
DEFENSE RESPONSE TO GRAM-NEGATIVE BACTERIUM%GOBP%GO:0050829	defense response to Gram-negative bacterium	83	0	0	3.0833	20	immune	6	humoral response defense
DEFENSE RESPONSE TO GRAM-POSITIVE BACTERIUM%GOBP%GO:0050830	defense response to Gram-positive bacterium	88	0	0	3.065	20	immune	6	humoral response defense
DEFENSINS%REACTOME%R-HSA-1461973.1	Defensins	50	0	0	3.1606	90	immune	6	beta defensins peptides
DENDRITE DEVELOPMENT%GOBP%GO:0016358	dendrite development	64	0	0.0001	-2.3467	19	neural development	7	dendritic spine presynapse
DENDRITE MORPHOGENESIS%GOBP%GO:0048813	dendrite morphogenesis	37	0	0	-2.4483	19	neural development	7	dendritic spine presynapse
DENDRITIC SPINE DEVELOPMENT%GOBP%GO:0060996	dendritic spine development	19	0	0.0034	-1.9937	19	neural development	7	dendritic spine presynapse
DENDRITIC SPINE MORPHOGENESIS%GOBP%GO:0060997	dendritic spine morphogenesis	15	0.0018	0.0072	-1.8993	19	neural development	7	dendritic spine presynapse
DENDRITIC SPINE ORGANIZATION%GOBP%GO:0097061	dendritic spine organization	25	0	0.0015	-2.0875	19	neural development	7	dendritic spine presynapse
DEPHOSPHORYLATION%GOBP%GO:0016311	dephosphorylation	177	0	0.001	-2.1344	138	growth regulation	3	protein dephosphorylation
DETECTION OF CHEMICAL STIMULUS INVOLVED IN SENSORY PERCEPTION OF BITTER TASTE%GOBP%GO:0001580	detection of chemical stimulus involved in sensory perception of bitter taste	38	0	0	3.18	22	environment sensing	11	chemical sensory perception
DETECTION OF CHEMICAL STIMULUS INVOLVED IN SENSORY PERCEPTION OF TASTE%GOBP%GO:0050912	detection of chemical stimulus involved in sensory perception of taste	42	0	0	3.2291	22	environment sensing	11	chemical sensory perception
DETECTION OF CHEMICAL STIMULUS INVOLVED IN SENSORY PERCEPTION%GOBP%GO:0050907	detection of chemical stimulus involved in sensory perception	43	0	0	3.1371	22	environment sensing	11	chemical sensory perception
DETECTION OF CHEMICAL STIMULUS%GOBP%GO:0009593	detection of chemical stimulus	72	0	0.0001	2.3962	22	environment sensing	11	chemical sensory perception
DETECTION OF STIMULUS INVOLVED IN SENSORY PERCEPTION%GOBP%GO:0050906	detection of stimulus involved in sensory perception	73	0	0.0011	2.1856	22	environment sensing	11	chemical sensory perception
DETOXIFICATION%GOBP%GO:0098754	detoxification	39	0	0.0012	2.172	26	environment sensing	11	zinc copper cadmium
DEVELOPMENTAL CELL GROWTH%GOBP%GO:0048588	developmental cell growth	45	0	0	-2.4435	39	neural development	7	developmental growth morphogenesis
DEVELOPMENTAL GROWTH INVOLVED IN MORPHOGENESIS%GOBP%GO:0060560	developmental growth involved in morphogenesis	53	0	0.0005	-2.216	39	neural development	7	developmental growth morphogenesis
DEVELOPMENTAL GROWTH%GOBP%GO:0048589	developmental growth	136	0	0.0006	-2.1982	39	neural development	7	developmental growth morphogenesis
DISEASES ASSOCIATED WITH O-GLYCOSYLATION OF PROTEINS%REACTOME%R-HSA-3906995.2	Diseases associated with O-glycosylation of proteins	65	0	0.0052	-1.9429	63	neural development	7	glycosylation domain proteins
DISRUPTION BY HOST OF SYMBIONT CELLS%GOBP%GO:0051852	disruption by host of symbiont cells	19	0	0	2.5609	30	immune	6	organism cells killing
DISRUPTION OF CELLS OF OTHER ORGANISM INVOLVED IN SYMBIOTIC INTERACTION%GOBP%GO:0051818	disruption of cells of other organism involved in symbiotic interaction	19	0	0	2.4905	30	immune	6	organism cells killing
DISRUPTION OF CELLS OF OTHER ORGANISM%GOBP%GO:0044364	disruption of cells of other organism	44	0	0	3.0982	30	immune	6	organism cells killing
DOUBLE-STRAND BREAK REPAIR VIA NONHOMOLOGOUS END JOINING%GOBP%GO:0006303	double-strand break repair via nonhomologous end joining	72	0.0018	0.0027	-2.0213	151	transcription	5	repair end joining
E-CADHERIN SIGNALING IN KERATINOCYTES%PATHWAY INTERACTION DATABASE NCI-NATURE CURATED DATA%E-CADHERIN SIGNALING IN KERATINOCYTES	E-cadherin signaling in keratinocytes	21	0.0019	0.0037	-1.9834	42	ECM	9	nascent aj nectin
E-CADHERIN SIGNALING IN THE NASCENT ADHERENS JUNCTION%PATHWAY INTERACTION DATABASE NCI-NATURE CURATED DATA%E-CADHERIN SIGNALING IN THE NASCENT ADHERENS JUNCTION	E-cadherin signaling in the nascent adherens junction	36	0	0.0006	-2.183	42	ECM	9	nascent aj nectin
ECM PROTEOGLYCANS%REACTOME%R-HSA-3000178.3	ECM proteoglycans	55	0.0017	0.0017	-2.0746	14	ECM	9	beta1 ecm proteoglycans
EFFECTS OF PIP2 HYDROLYSIS%REACTOME DATABASE ID RELEASE 72%114508	Effects of PIP2 hydrolysis	27	0	0	-2.4364	221	growth regulation	3	effects pip2 hydrolysis
EGF RECEPTOR (ERBB1) SIGNALING PATHWAY%PATHWAY INTERACTION DATABASE NCI-NATURE CURATED DATA%EGF RECEPTOR (ERBB1) SIGNALING PATHWAY	EGF receptor (ErbB1) signaling pathway	32	0	0.0004	-2.2199	34	growth regulation	3	egf pathway biopeptides
EGF RECEPTOR SIGNALING PATHWAY%PANTHER PATHWAY%P00018	EGF receptor signaling pathway	114	0	0	-2.603	123	growth regulation	3	fgf egf pathway
EGR2 AND SOX10-MEDIATED INITIATION OF SCHWANN CELL MYELINATION%REACTOME DATABASE ID RELEASE 72%9619665	EGR2 and SOX10-mediated initiation of Schwann cell myelination	28	0.0018	0.0094	-1.8665	226	neural development	7	egr2 sox10 mediated
ELECTRON TRANSPORT CHAIN%GOBP%GO:0022900	electron transport chain	94	0	0.0015	2.1529	13	mitochondrion	10	atp electron respiratory
ENDOTHELINS%PATHWAY INTERACTION DATABASE NCI-NATURE CURATED DATA%ENDOTHELINS	Endothelins	63	0	0.0007	-2.1758	2	muscle control	8	pka glucagon endothelin
EOSINOPHIL CHEMOTAXIS%GOBP%GO:0048245	eosinophil chemotaxis	19	0	0.0001	2.4151	10	immune	6	chemokine monocyte chemotaxis
EOSINOPHIL MIGRATION%GOBP%GO:0072677	eosinophil migration	19	0	0	2.4456	10	immune	6	chemokine monocyte chemotaxis
EPH-EPHRIN MEDIATED REPULSION OF CELLS%REACTOME%R-HSA-3928665.3	EPH-ephrin mediated repulsion of cells	47	0	0.0052	-1.9416	45	growth regulation	3	eph ephrin signaling
EPH-EPHRIN SIGNALING%REACTOME%R-HSA-2682334.1	EPH-Ephrin signaling	90	0	0.0002	-2.2917	45	growth regulation	3	eph ephrin signaling
EPHB-MEDIATED FORWARD SIGNALING%REACTOME%R-HSA-3928662.2	EPHB-mediated forward signaling	33	0	0.002	-2.0537	6	neural development	7	leishmania phagocytosis engulfment
EPHRIN B REVERSE SIGNALING%PATHWAY INTERACTION DATABASE NCI-NATURE CURATED DATA%EPHRIN B REVERSE SIGNALING	Ephrin B reverse signaling	26	0	0.0003	-2.2557	27	growth regulation	3	erbb1 proximal downstream
EPHRIN RECEPTOR SIGNALING PATHWAY%GOBP%GO:0048013	ephrin receptor signaling pathway	81	0	0.0002	-2.3114	45	growth regulation	3	eph ephrin signaling
EPHRIN SIGNALING%REACTOME%R-HSA-3928664.2	Ephrin signaling	17	0.0018	0.007	-1.9027	45	growth regulation	3	eph ephrin signaling
EPIDERMAL GROWTH FACTOR RECEPTOR SIGNALING PATHWAY%GOBP%GO:0007173	epidermal growth factor receptor signaling pathway	46	0	0.0004	-2.2226	119	growth regulation	3	epidermal growth erbb
EPO SIGNALING PATHWAY%PATHWAY INTERACTION DATABASE NCI-NATURE CURATED DATA%EPO SIGNALING PATHWAY	EPO signaling pathway	32	0.0036	0.0055	-1.9352	3	immune	6	scf kit epo
EPO%IOB%EPO	EPO	52	0	0.0005	-2.2104	3	immune	6	scf kit epo
ERBB RECEPTOR SIGNALING NETWORK%PATHWAY INTERACTION DATABASE NCI-NATURE CURATED DATA%ERBB RECEPTOR SIGNALING NETWORK	ErbB receptor signaling network	15	0.0055	0.0098	-1.8594	24	growth regulation	3	pi3k cancer erbb4
ERBB SIGNALING PATHWAY%GOBP%GO:0038127	ERBB signaling pathway	66	0	0.0001	-2.3913	119	growth regulation	3	epidermal growth erbb
ERBB1 DOWNSTREAM SIGNALING%PATHWAY INTERACTION DATABASE NCI-NATURE CURATED DATA%ERBB1 DOWNSTREAM SIGNALING	ErbB1 downstream signaling	104	0	0.0059	-1.9245	27	growth regulation	3	erbb1 proximal downstream
ERBB2 ERBB3 SIGNALING EVENTS%PATHWAY INTERACTION DATABASE NCI-NATURE CURATED DATA%ERBB2 ERBB3 SIGNALING EVENTS	ErbB2 ErbB3 signaling events	41	0	0.008	-1.8857	107	growth regulation	3	erbb2 erbb3 signaling
ERBB2 SIGNALING PATHWAY%GOBP%GO:0038128	ERBB2 signaling pathway	32	0	0.0034	-1.9937	24	growth regulation	3	pi3k cancer erbb4
ERBB4 SIGNALING EVENTS%PATHWAY INTERACTION DATABASE NCI-NATURE CURATED DATA%ERBB4 SIGNALING EVENTS	ErbB4 signaling events	35	0	0	-2.548	24	growth regulation	3	pi3k cancer erbb4
ESTABLISHMENT OF CELL POLARITY%GOBP%GO:0030010	establishment of cell polarity	85	0	0.0066	-1.9103	40	cell polarity and organization	14	apical polarity establishment
ESTABLISHMENT OF EPITHELIAL CELL POLARITY%GOBP%GO:0090162	establishment of epithelial cell polarity	20	0.0018	0.0068	-1.9082	40	cell polarity and organization	14	apical polarity establishment
ESTABLISHMENT OF PROTEIN LOCALIZATION TO ENDOPLASMIC RETICULUM%GOBP%GO:0072599	establishment of protein localization to endoplasmic reticulum	108	0	0	2.9488	1	protein translation	13	complex decay targeting
ESTABLISHMENT OR MAINTENANCE OF APICAL/BASAL CELL POLARITY%GOBP%GO:0035088	establishment or maintenance of apical/basal cell polarity	37	0.0018	0.0086	-1.8779	40	cell polarity and organization	14	apical polarity establishment
ESTABLISHMENT OR MAINTENANCE OF BIPOLAR CELL POLARITY%GOBP%GO:0061245	establishment or maintenance of bipolar cell polarity	37	0	0.0077	-1.8908	40	cell polarity and organization	14	apical polarity establishment
ESTABLISHMENT OR MAINTENANCE OF CELL POLARITY%GOBP%GO:0007163	establishment or maintenance of cell polarity	147	0	0.0025	-2.029	40	cell polarity and organization	14	apical polarity establishment
ESTABLISHMENT OR MAINTENANCE OF EPITHELIAL CELL APICAL/BASAL POLARITY%GOBP%GO:0045197	establishment or maintenance of epithelial cell apical/basal polarity	33	0	0.0035	-1.9889	40	cell polarity and organization	14	apical polarity establishment
EUKARYOTIC TRANSLATION ELONGATION%REACTOME%R-HSA-156842.2	Eukaryotic Translation Elongation	94	0	0	3.4125	1	protein translation	13	complex decay targeting
EUKARYOTIC TRANSLATION INITIATION%REACTOME DATABASE ID RELEASE 72%72613	Eukaryotic Translation Initiation	120	0	0	3.0612	1	protein translation	13	complex decay targeting
EUKARYOTIC TRANSLATION TERMINATION%REACTOME%R-HSA-72764.4	Eukaryotic Translation Termination	94	0	0	3.3401	1	protein translation	13	complex decay targeting
EXPORT OF VIRAL RIBONUCLEOPROTEINS FROM NUCLEUS%REACTOME%R-HSA-168274.3	Export of Viral Ribonucleoproteins from Nucleus	28	0	0.0047	-1.9564	4	transcription	5	mature sumoylation ubiquitinylation
EYE MORPHOGENESIS%GOBP%GO:0048592	eye morphogenesis	72	0	0.0062	-1.9177	229	development	2	eye morphogenesis
FAS%IOB%FAS	Fas	115	0	0.0034	-1.9958	179	cell death	12	fas
FC RECEPTOR MEDIATED STIMULATORY SIGNALING PATHWAY%GOBP%GO:0002431	Fc receptor mediated stimulatory signaling pathway	84	0	0.0004	-2.2133	6	neural development	7	leishmania phagocytosis engulfment
FC RECEPTOR SIGNALING PATHWAY%GOBP%GO:0038093	Fc receptor signaling pathway	179	0	0.0031	-2.0062	6	neural development	7	leishmania phagocytosis engulfment
FC-EPSILON RECEPTOR I SIGNALING IN MAST CELLS%PATHWAY INTERACTION DATABASE NCI-NATURE CURATED DATA%FC-EPSILON RECEPTOR I SIGNALING IN MAST CELLS	Fc-epsilon receptor I signaling in mast cells	60	0.0017	0.0064	-1.9134	3	immune	6	scf kit epo
FC-GAMMA RECEPTOR SIGNALING PATHWAY INVOLVED IN PHAGOCYTOSIS%GOBP%GO:0038096	Fc-gamma receptor signaling pathway involved in phagocytosis	82	0	0.0002	-2.3047	6	neural development	7	leishmania phagocytosis engulfment
FC-GAMMA RECEPTOR SIGNALING PATHWAY%GOBP%GO:0038094	Fc-gamma receptor signaling pathway	83	0	0.0004	-2.2228	6	neural development	7	leishmania phagocytosis engulfment
FCERI MEDIATED CA+2 MOBILIZATION%REACTOME%R-HSA-2871809.1	FCERI mediated Ca+2 mobilization	33	0	0.0001	-2.3831	6	neural development	7	leishmania phagocytosis engulfment
FCGAMMA RECEPTOR (FCGR) DEPENDENT PHAGOCYTOSIS%REACTOME%R-HSA-2029480.1	Fcgamma receptor (FCGR) dependent phagocytosis	94	0	0	-2.4745	6	neural development	7	leishmania phagocytosis engulfment
FCGR3A-MEDIATED IL10 SYNTHESIS%REACTOME%R-HSA-9664323.1	FCGR3A-mediated IL10 synthesis	46	0	0.0009	-2.152	2	muscle control	8	pka glucagon endothelin
FCGR3A-MEDIATED PHAGOCYTOSIS%REACTOME%R-HSA-9664422.1	FCGR3A-mediated phagocytosis	67	0	0.0001	-2.3698	6	neural development	7	leishmania phagocytosis engulfment
FGF SIGNALING PATHWAY%PANTHER PATHWAY%P00021	FGF signaling pathway	104	0	0.0024	-2.0358	123	growth regulation	3	fgf egf pathway
FGFR1 MUTANT RECEPTOR ACTIVATION%REACTOME%R-HSA-1839124.2	FGFR1 mutant receptor activation	26	0.0018	0.0014	-2.0975	79	growth regulation	3	cytosolic fgfr1 activation
FLK2 FLT3%IOB%FLK2 FLT3	FLK2 FLT3	23	0.0018	0.0077	-1.8904	3	immune	6	scf kit epo
FOCAL ADHESION ASSEMBLY%GOBP%GO:0048041	focal adhesion assembly	20	0.0055	0.0089	-1.8744	16	ECM	9	nephrin neph1 junction
FOREBRAIN CELL MIGRATION%GOBP%GO:0021885	forebrain cell migration	25	0	0.0009	-2.1532	18	neural development	7	forebrain neurons development
FOREBRAIN DEVELOPMENT%GOBP%GO:0030900	forebrain development	139	0	0.0009	-2.1449	18	neural development	7	forebrain neurons development
FOREBRAIN GENERATION OF NEURONS%GOBP%GO:0021872	forebrain generation of neurons	27	0	0.0033	-1.9981	18	neural development	7	forebrain neurons development
FOREBRAIN NEURON DIFFERENTIATION%GOBP%GO:0021879	forebrain neuron differentiation	20	0	0.0012	-2.1142	18	neural development	7	forebrain neurons development
FORMATION OF A POOL OF FREE 40S SUBUNITS%REACTOME DATABASE ID RELEASE 72%72689	Formation of a pool of free 40S subunits	102	0	0	3.2164	1	protein translation	13	complex decay targeting
FORMATION OF THE CORNIFIED ENVELOPE%REACTOME%R-HSA-6809371.3	Formation of the cornified envelope	75	0	0	2.6585	81	immune	6	formation cornified envelope
FORMATION OF THE TERNARY COMPLEX, AND SUBSEQUENTLY, THE 43S COMPLEX%REACTOME DATABASE ID RELEASE 72%72695	Formation of the ternary complex, and subsequently, the 43S complex	52	0	0	2.5268	1	protein translation	13	complex decay targeting
G ALPHA (12 13) SIGNALLING EVENTS%REACTOME DATABASE ID RELEASE 72%416482	G alpha (12 13) signalling events	80	0	0.0001	-2.3961	23	cell death	12	signals death jnk
G PROTEIN-COUPLED GLUTAMATE RECEPTOR SIGNALING PATHWAY%GOBP%GO:0007216	G protein-coupled glutamate receptor signaling pathway	15	0	0.0004	-2.2277	74	neural development	7	coupled glutamate glutamatergic
G-PROTEIN MEDIATED EVENTS%REACTOME%R-HSA-112040.1	G-protein mediated events	53	0	0	-2.423	2	muscle control	8	pka glucagon endothelin
GABA RECEPTOR ACTIVATION%REACTOME DATABASE ID RELEASE 72%977443	GABA receptor activation	60	0	0.0008	-2.1637	9	neural development	7	glutamate receptors nmda
GABA-B_RECEPTOR_II_SIGNALING%PANTHER PATHWAY%P05731	GABA-B_receptor_II_signaling	35	0.0017	0.0097	-1.8613	2	muscle control	8	pka glucagon endothelin
GAMMA-AMINOBUTYRIC ACID SIGNALING PATHWAY%GOBP%GO:0007214	gamma-aminobutyric acid signaling pathway	21	0	0.0004	-2.236	29	growth regulation	3	anion chloride transmembrane
GAP JUNCTION ASSEMBLY%REACTOME DATABASE ID RELEASE 72%190861	Gap junction assembly	19	0	0.0012	2.177	230	cell communication	20	gap junction assembly
GASTRIN_CCK2R_240212%PANTHER PATHWAY%P06959	Gastrin_CCK2R_240212	146	0	0.0008	-2.1642	12	ECM	9	hepatocyte vegfr3 angiogenesis
GENE SILENCING BY RNA%GOBP%GO:0031047	gene silencing by RNA	67	0	0.0052	-1.9425	108	transcription	5	posttranscriptional silencing rna
GLOMERULUS DEVELOPMENT%GOBP%GO:0032835	glomerulus development	35	0	0.0057	-1.9276	222	development	2	glomerulus development
GLUTAMATE BINDING, ACTIVATION OF AMPA RECEPTORS AND SYNAPTIC PLASTICITY%REACTOME DATABASE ID RELEASE 72%399721	Glutamate binding, activation of AMPA receptors and synaptic plasticity	26	0	0	-2.429	9	neural development	7	glutamate receptors nmda
GLUTAMATE RECEPTOR SIGNALING PATHWAY%GOBP%GO:0007215	glutamate receptor signaling pathway	38	0	0	-2.9146	74	neural development	7	coupled glutamate glutamatergic
GLYPICAN 1 NETWORK%PATHWAY INTERACTION DATABASE NCI-NATURE CURATED DATA%GLYPICAN 1 NETWORK	Glypican 1 network	26	0.0018	0.0097	-1.8603	103	development	2	glypican 1pathway 1
GM-CSF%IOB%GM-CSF	GM-CSF	81	0	0.0052	-1.9423	3	immune	6	scf kit epo
GRANULOCYTE CHEMOTAXIS%GOBP%GO:0071621	granulocyte chemotaxis	69	0	0	2.6556	10	immune	6	chemokine monocyte chemotaxis
GRANULOCYTE MIGRATION%GOBP%GO:0097530	granulocyte migration	75	0	0	2.5529	10	immune	6	chemokine monocyte chemotaxis
GROWTH%GOBP%GO:0040007	growth	137	0	0.0009	-2.1518	39	neural development	7	developmental growth morphogenesis
GTP HYDROLYSIS AND JOINING OF THE 60S RIBOSOMAL SUBUNIT%REACTOME DATABASE ID RELEASE 72%72706	GTP hydrolysis and joining of the 60S ribosomal subunit	113	0	0	3.1512	1	protein translation	13	complex decay targeting
HALLMARK_ANDROGEN_RESPONSE%MSIGDB_C2%HALLMARK_ANDROGEN_RESPONSE	HALLMARK_ANDROGEN_RESPONSE	101	0	0.0048	-1.9532	216	growth regulation	3	androgen response
HALLMARK_MITOTIC_SPINDLE%MSIGDB_C2%HALLMARK_MITOTIC_SPINDLE	HALLMARK_MITOTIC_SPINDLE	200	0	0	-2.8944	205	transcription	5	mitotic spindle
HALLMARK_PROTEIN_SECRETION%MSIGDB_C2%HALLMARK_PROTEIN_SECRETION	HALLMARK_PROTEIN_SECRETION	96	0	0.0003	-2.2566	181	growth regulation	3	protein secretion
HALLMARK_UV_RESPONSE_DN%MSIGDB_C2%HALLMARK_UV_RESPONSE_DN	HALLMARK_UV_RESPONSE_DN	145	0	0	-3.1963	166	transcription	5	uv response dn
HCMV EARLY EVENTS%REACTOME DATABASE ID RELEASE 72%9609690	HCMV Early Events	115	0	0.0022	-2.0474	4	transcription	5	mature sumoylation ubiquitinylation
HDMS DEMETHYLATE HISTONES%REACTOME%R-HSA-3214842.3	HDMs demethylate histones	50	0	0.001	-2.1295	55	transcription	5	pkmts chromatin organization
HDR THROUGH SINGLE STRAND ANNEALING (SSA)%REACTOME DATABASE ID RELEASE 72%5685938	HDR through Single Strand Annealing (SSA)	37	0	0.002	-2.0545	47	neural development	7	hdr strand exchange
HEART CONTRACTION%GOBP%GO:0060047	heart contraction	71	0	0.0033	-1.9982	7	muscle control	8	action contraction cardiac
HEART PROCESS%GOBP%GO:0003015	heart process	80	0	0.001	-2.141	7	muscle control	8	action contraction cardiac
HEDGEHOG SIGNALING EVENTS MEDIATED BY GLI PROTEINS%PATHWAY INTERACTION DATABASE NCI-NATURE CURATED DATA%HEDGEHOG SIGNALING EVENTS MEDIATED BY GLI PROTEINS	Hedgehog signaling events mediated by Gli proteins	48	0	0.0069	-1.9053	87	growth regulation	3	hedgehog signaling gli
HEDGEHOG SIGNALING PATHWAY%PANTHER PATHWAY%P00025	Hedgehog signaling pathway	19	0	0.0071	-1.9017	87	growth regulation	3	hedgehog signaling gli
HEPARAN SULFATE HEPARIN (HS-GAG) METABOLISM%REACTOME DATABASE ID RELEASE 72%1638091	Heparan sulfate heparin (HS-GAG) metabolism	54	0	0.0009	-2.1458	46	ECM	9	heparan sulfate proteoglycan
HEPARAN SULFATE PROTEOGLYCAN BIOSYNTHETIC PROCESS%GOBP%GO:0015012	heparan sulfate proteoglycan biosynthetic process	19	0	0.0009	-2.1448	46	ECM	9	heparan sulfate proteoglycan
HEPARAN SULFATE PROTEOGLYCAN METABOLIC PROCESS%GOBP%GO:0030201	heparan sulfate proteoglycan metabolic process	25	0	0.0001	-2.34	46	ECM	9	heparan sulfate proteoglycan
HETEROPHILIC CELL-CELL ADHESION VIA PLASMA MEMBRANE CELL ADHESION MOLECULES%GOBP%GO:0007157	heterophilic cell-cell adhesion via plasma membrane cell adhesion molecules	41	0	0.0006	-2.1913	62	ECM	9	plasma adhesion molecules
HETEROTRIMERIC G-PROTEIN SIGNALING PATHWAY-GQ ALPHA AND GO ALPHA MEDIATED PATHWAY%PANTHER PATHWAY%P00027	Heterotrimeric G-protein signaling pathway-Gq alpha and Go alpha mediated pathway	118	0	0.0018	-2.0678	130	muscle control	8	heterotrimeric protein gq
HIPPO SIGNALING%GOBP%GO:0035329	hippo signaling	26	0	0.0002	-2.2832	143	growth regulation	3	signaling hippo
HISTAMINE H1 RECEPTOR MEDIATED SIGNALING PATHWAY%PANTHER PATHWAY%P04385	Histamine H1 receptor mediated signaling pathway	41	0	0.0011	-2.1288	88	growth regulation	3	thyrotropin releasing hormone
HOMOLOGOUS DNA PAIRING AND STRAND EXCHANGE%REACTOME DATABASE ID RELEASE 72%5693579	Homologous DNA Pairing and Strand Exchange	42	0	0.0051	-1.9451	47	neural development	7	hdr strand exchange
HOMOPHILIC CELL ADHESION VIA PLASMA MEMBRANE ADHESION MOLECULES%GOBP%GO:0007156	homophilic cell adhesion via plasma membrane adhesion molecules	73	0	0	-2.6605	62	ECM	9	plasma adhesion molecules
HS-GAG BIOSYNTHESIS%REACTOME DATABASE ID RELEASE 72%2022928	HS-GAG biosynthesis	31	0.0018	0.0001	-2.3931	46	ECM	9	heparan sulfate proteoglycan
IFN-ALPHA%IOB%IFN-ALPHA	IFN-alpha	37	0.0035	0.0097	-1.8602	58	immune	6	ifn gamma tslp
IFN-GAMMA%IOB%IFN-GAMMA	IFN-gamma	41	0	0.0057	-1.9281	58	immune	6	ifn gamma tslp
IGF1 PATHWAY%PATHWAY INTERACTION DATABASE NCI-NATURE CURATED DATA%IGF1 PATHWAY	IGF1 pathway	29	0.0017	0.0068	-1.9074	41	growth regulation	3	igf1 insulin pathway
IL-7%NETPATH%IL-7	IL-7	28	0	0.0008	-2.1585	3	immune	6	scf kit epo
IL2%NETPATH%IL2	IL2	81	0	0.0019	-2.0646	3	immune	6	scf kit epo
IL3%NETPATH%IL3	IL3	84	0	0.0017	-2.074	3	immune	6	scf kit epo
IL6%NETPATH%IL6	IL6	85	0	0.0054	-1.9374	3	immune	6	scf kit epo
IL8- AND CXCR2-MEDIATED SIGNALING EVENTS%PATHWAY INTERACTION DATABASE NCI-NATURE CURATED DATA%IL8- AND CXCR2-MEDIATED SIGNALING EVENTS	IL8- and CXCR2-mediated signaling events	34	0.0017	0.0068	-1.908	75	immune	6	il8 cxcr2 thromboxane
IMMUNE RESPONSE-REGULATING CELL SURFACE RECEPTOR SIGNALING PATHWAY INVOLVED IN PHAGOCYTOSIS%GOBP%GO:0002433	immune response-regulating cell surface receptor signaling pathway involved in phagocytosis	82	0	0.0003	-2.2629	6	neural development	7	leishmania phagocytosis engulfment
IMPORT ACROSS PLASMA MEMBRANE%GOBP%GO:0098739	import across plasma membrane	102	0	0.0058	-1.9265	57	muscle control	8	sodium acids oligopeptides
INDOLALKYLAMINE METABOLIC PROCESS%GOBP%GO:0006586	indolalkylamine metabolic process	16	0	0.0034	-1.9913	153	circadian rhythm	21	biogenic amine indolalkylamine
INFLUENZA INFECTION%REACTOME%R-HSA-168255.4	Influenza Infection	151	0	0.0001	2.4117	1	protein translation	13	complex decay targeting
INFLUENZA VIRAL RNA TRANSCRIPTION AND REPLICATION%REACTOME DATABASE ID RELEASE 72%168273	Influenza Viral RNA Transcription and Replication	132	0	0	2.5969	1	protein translation	13	complex decay targeting
INNATE IMMUNE RESPONSE IN MUCOSA%GOBP%GO:0002227	innate immune response in mucosa	24	0	0.0005	2.2509	20	immune	6	humoral response defense
INORGANIC ANION TRANSMEMBRANE TRANSPORT%GOBP%GO:0098661	inorganic anion transmembrane transport	53	0	0	-2.7061	29	growth regulation	3	anion chloride transmembrane
INORGANIC ANION TRANSPORT%GOBP%GO:0015698	inorganic anion transport	93	0	0.0001	-2.3643	29	growth regulation	3	anion chloride transmembrane
INOSITOL LIPID-MEDIATED SIGNALING%GOBP%GO:0048017	inositol lipid-mediated signaling	72	0	0	-2.4167	8	muscle control	8	calcium inositol phosphate
INOSITOL PHOSPHATE BIOSYNTHETIC PROCESS%GOBP%GO:0032958	inositol phosphate biosynthetic process	26	0	0.0001	-2.3342	8	muscle control	8	calcium inositol phosphate
INOSITOL PHOSPHATE METABOLIC PROCESS%GOBP%GO:0043647	inositol phosphate metabolic process	50	0	0.0017	-2.072	8	muscle control	8	calcium inositol phosphate
INOSITOL PHOSPHATE METABOLISM%REACTOME%R-HSA-1483249.3	Inositol phosphate metabolism	47	0	0.0076	-1.8926	8	muscle control	8	calcium inositol phosphate
INOSITOL TRISPHOSPHATE BIOSYNTHETIC PROCESS%GOBP%GO:0032959	inositol trisphosphate biosynthetic process	15	0	0.0004	-2.2229	8	muscle control	8	calcium inositol phosphate
INOSITOL TRISPHOSPHATE METABOLIC PROCESS%GOBP%GO:0032957	inositol trisphosphate metabolic process	17	0	0.0007	-2.181	8	muscle control	8	calcium inositol phosphate
INSULIN PATHWAY%PATHWAY INTERACTION DATABASE NCI-NATURE CURATED DATA%INSULIN PATHWAY	Insulin Pathway	43	0	0.0027	-2.0224	41	growth regulation	3	igf1 insulin pathway
INTEGRATION OF ENERGY METABOLISM%REACTOME DATABASE ID RELEASE 72%163685	Integration of energy metabolism	107	0	0.002	-2.0557	2	muscle control	8	pka glucagon endothelin
INTEGRIN CELL SURFACE INTERACTIONS%REACTOME%R-HSA-216083.2	Integrin cell surface interactions	64	0	0.0057	-1.9301	38	ECM	9	integrin family cs
INTEGRIN FAMILY CELL SURFACE INTERACTIONS%PATHWAY INTERACTION DATABASE NCI-NATURE CURATED DATA%INTEGRIN FAMILY CELL SURFACE INTERACTIONS	Integrin family cell surface interactions	26	0	0.0014	-2.0941	38	ECM	9	integrin family cs
INTEGRIN SIGNALLING PATHWAY%PANTHER PATHWAY%P00034	Integrin signalling pathway	165	0	0	-2.6486	12	ECM	9	hepatocyte vegfr3 angiogenesis
INTEGRIN-MEDIATED SIGNALING PATHWAY%GOBP%GO:0007229	integrin-mediated signaling pathway	72	0	0.0047	-1.957	38	ECM	9	integrin family cs
INTEGRINS IN ANGIOGENESIS%PATHWAY INTERACTION DATABASE NCI-NATURE CURATED DATA%INTEGRINS IN ANGIOGENESIS	Integrins in angiogenesis	61	0	0.0005	-2.2054	12	ECM	9	hepatocyte vegfr3 angiogenesis
INTERACTION BETWEEN L1 AND ANKYRINS%REACTOME%R-HSA-445095.1	Interaction between L1 and Ankyrins	29	0	0	-2.5172	69	growth regulation	3	signal transduction l1
INTERFERON ALPHA BETA SIGNALING%REACTOME%R-HSA-909733.2	Interferon alpha beta signaling	66	0	0.0001	2.4069	5	immune	6	type interferon proliferation
INTERLEUKIN-10 SIGNALING%REACTOME DATABASE ID RELEASE 72%6783783	Interleukin-10 signaling	46	0	0.0016	2.1496	177	immune	6	interleukin 10 signaling
INTERLEUKIN-3, INTERLEUKIN-5 AND GM-CSF SIGNALING%REACTOME%R-HSA-512988.5	Interleukin-3, Interleukin-5 and GM-CSF signaling	43	0	0.0097	-1.8609	83	immune	6	interleukin 5 gm
INTERNALIZATION OF ERBB1%PATHWAY INTERACTION DATABASE NCI-NATURE CURATED DATA%INTERNALIZATION OF ERBB1	Internalization of ErbB1	38	0	0.0002	-2.3088	144	growth regulation	3	erbb1 internalization pathway
INTRA-GOLGI AND RETROGRADE GOLGI-TO-ER TRAFFIC%REACTOME DATABASE ID RELEASE 72%6811442	Intra-Golgi and retrograde Golgi-to-ER traffic	183	0	0.0089	-1.8736	217	cytoskeleton	4	retrograde traffic intra
INTRASPECIES INTERACTION BETWEEN ORGANISMS%GOBP%GO:0051703	intraspecies interaction between organisms	28	0	0.0067	-1.9086	60	neural development	7	learning social behavior
ION CHANNEL TRANSPORT%REACTOME%R-HSA-983712.2	Ion channel transport	176	0	0.0002	-2.2936	91	cytoskeleton	4	trp channels stimuli
ION TRANSPORT BY P-TYPE ATPASES%REACTOME%R-HSA-936837.2	Ion transport by P-type ATPases	54	0	0.0034	-1.9929	73	cytoskeleton	4	translocation distribution atpases
IONOTROPIC GLUTAMATE RECEPTOR PATHWAY%PANTHER PATHWAY%P00037	Ionotropic glutamate receptor pathway	41	0	0.0004	-2.2382	9	neural development	7	glutamate receptors nmda
JAK STAT SIGNALING PATHWAY%PANTHER PATHWAY%P00038	JAK STAT signaling pathway	15	0.0075	0.0091	-1.8707	58	immune	6	ifn gamma tslp
KERATINIZATION%GOBP%GO:0031424	keratinization	200	0	0	3.8297	81	immune	6	formation cornified envelope
KILLING BY HOST OF SYMBIONT CELLS%GOBP%GO:0051873	killing by host of symbiont cells	19	0	0	2.516	30	immune	6	organism cells killing
KILLING OF CELLS IN OTHER ORGANISM INVOLVED IN SYMBIOTIC INTERACTION%GOBP%GO:0051883	killing of cells in other organism involved in symbiotic interaction	19	0	0	2.4846	30	immune	6	organism cells killing
KILLING OF CELLS OF OTHER ORGANISM%GOBP%GO:0031640	killing of cells of other organism	44	0	0	3.0761	30	immune	6	organism cells killing
KITRECEPTOR%IOB%KITRECEPTOR	KitReceptor	91	0	0.0001	-2.394	3	immune	6	scf kit epo
KITRECEPTOR%NETPATH%KITRECEPTOR	KitReceptor	104	0	0.0001	-2.3219	3	immune	6	scf kit epo
L13A-MEDIATED TRANSLATIONAL SILENCING OF CERULOPLASMIN EXPRESSION%REACTOME%R-HSA-156827.3	L13a-mediated translational silencing of Ceruloplasmin expression	112	0	0	3.1875	1	protein translation	13	complex decay targeting
L1CAM INTERACTIONS%REACTOME DATABASE ID RELEASE 72%373760	L1CAM interactions	97	0	0	-2.9229	69	growth regulation	3	signal transduction l1
LAMELLIPODIUM ASSEMBLY%GOBP%GO:0030032	lamellipodium assembly	24	0	0.0006	-2.1935	157	cell polarity and organization	14	lamellipodium organization assembly
LAMELLIPODIUM ORGANIZATION%GOBP%GO:0097581	lamellipodium organization	28	0	0.0011	-2.1155	157	cell polarity and organization	14	lamellipodium organization assembly
LAMININ INTERACTIONS%REACTOME DATABASE ID RELEASE 72%3000157	Laminin interactions	23	0	0.0003	-2.2657	14	ECM	9	beta1 ecm proteoglycans
LEARNING OR MEMORY%GOBP%GO:0007611	learning or memory	111	0	0.0036	-1.9875	60	neural development	7	learning social behavior
LEARNING%GOBP%GO:0007612	learning	52	0	0.0012	-2.1118	60	neural development	7	learning social behavior
LEISHMANIA PHAGOCYTOSIS%REACTOME DATABASE ID RELEASE 72%9664417	Leishmania phagocytosis	67	0	0.0001	-2.3975	6	neural development	7	leishmania phagocytosis engulfment
LEPTIN%IOB%LEPTIN	Leptin	50	0	0.0021	-2.0496	3	immune	6	scf kit epo
LEPTIN%NETPATH%LEPTIN	Leptin	98	0	0.0034	-1.9947	3	immune	6	scf kit epo
LEUKOCYTE CHEMOTAXIS%GOBP%GO:0030595	leukocyte chemotaxis	118	0	0.0001	2.3874	10	immune	6	chemokine monocyte chemotaxis
LEUKOCYTE PROLIFERATION%GOBP%GO:0070661	leukocyte proliferation	55	0	0.006	2.015	5	immune	6	type interferon proliferation
LIPID MODIFICATION%GOBP%GO:0030258	lipid modification	172	0	0.0061	-1.9205	15	cytoskeleton	4	synthesis pips phosphatidylinositol
LIPID PHOSPHORYLATION%GOBP%GO:0046834	lipid phosphorylation	44	0	0.0021	-2.0484	15	cytoskeleton	4	synthesis pips phosphatidylinositol
LIPID TRANSLOCATION%GOBP%GO:0034204	lipid translocation	25	0	0	-2.58	73	cytoskeleton	4	translocation distribution atpases
LOCALIZATION WITHIN MEMBRANE%GOBP%GO:0051668	localization within membrane	84	0	0	-2.5035	17	neural development	7	protein localization periphery
LONG-TERM POTENTIATION%REACTOME DATABASE ID RELEASE 72%9620244	Long-term potentiation	21	0	0.0026	-2.0265	9	neural development	7	glutamate receptors nmda
LPA RECEPTOR MEDIATED EVENTS%PATHWAY INTERACTION DATABASE NCI-NATURE CURATED DATA%LPA RECEPTOR MEDIATED EVENTS	LPA receptor mediated events	64	0	0.0022	-2.0458	65	growth regulation	3	nongenomic estrogen lpa
LPA4-MEDIATED SIGNALING EVENTS%PATHWAY INTERACTION DATABASE NCI-NATURE CURATED DATA%LPA4-MEDIATED SIGNALING EVENTS	LPA4-mediated signaling events	15	0	0.0011	-2.1236	2	muscle control	8	pka glucagon endothelin
LYMPHOCYTE CHEMOTAXIS%GOBP%GO:0048247	lymphocyte chemotaxis	48	0	0	2.524	10	immune	6	chemokine monocyte chemotaxis
LYMPHOCYTE MIGRATION%GOBP%GO:0072676	lymphocyte migration	63	0	0.0008	2.2128	10	immune	6	chemokine monocyte chemotaxis
LYMPHOCYTE PROLIFERATION%GOBP%GO:0046651	lymphocyte proliferation	49	0	0.0024	2.1141	5	immune	6	type interferon proliferation
M-CSF%IOB%M-CSF	M-CSF	62	0	0.0008	-2.1632	3	immune	6	scf kit epo
MAJOR PATHWAY OF RRNA PROCESSING IN THE NUCLEOLUS AND CYTOSOL%REACTOME%R-HSA-6791226.3	Major pathway of rRNA processing in the nucleolus and cytosol	183	0	0	2.7157	1	protein translation	13	complex decay targeting
MECP2 REGULATES NEURONAL RECEPTORS AND CHANNELS%REACTOME DATABASE ID RELEASE 72%9022699	MECP2 regulates neuronal receptors and channels	16	0	0.0006	-2.1977	80	neural development	7	mecp2 neuronal channels
MEMBRANE ASSEMBLY%GOBP%GO:0071709	membrane assembly	29	0	0.002	-2.0547	92	cell polarity and organization	14	biogenesis membrane organization
MEMBRANE BIOGENESIS%GOBP%GO:0044091	membrane biogenesis	32	0	0.0026	-2.0275	92	cell polarity and organization	14	biogenesis membrane organization
MEMBRANE DEPOLARIZATION DURING ACTION POTENTIAL%GOBP%GO:0086010	membrane depolarization during action potential	30	0	0.0001	-2.3246	7	muscle control	8	action contraction cardiac
MEMBRANE DEPOLARIZATION DURING CARDIAC MUSCLE CELL ACTION POTENTIAL%GOBP%GO:0086012	membrane depolarization during cardiac muscle cell action potential	17	0	0.0039	-1.9792	7	muscle control	8	action contraction cardiac
MEMBRANE DEPOLARIZATION%GOBP%GO:0051899	membrane depolarization	45	0	0	-2.426	7	muscle control	8	action contraction cardiac
MEMBRANE DOCKING%GOBP%GO:0022406	membrane docking	161	0	0.0034	-1.9938	52	cytoskeleton	4	basal body docking
MET ACTIVATES PTK2 SIGNALING%REACTOME%R-HSA-8874081.1	MET activates PTK2 signaling	18	0	0.0009	-2.1475	14	ECM	9	beta1 ecm proteoglycans
MET PROMOTES CELL MOTILITY%REACTOME%R-HSA-8875878.1	MET promotes cell motility	28	0	0.0001	-2.3592	14	ECM	9	beta1 ecm proteoglycans
METABOTROPIC GLUTAMATE RECEPTOR GROUP I PATHWAY%PANTHER PATHWAY%P00041	Metabotropic glutamate receptor group I pathway	24	0	0.0003	-2.2618	9	neural development	7	glutamate receptors nmda
METABOTROPIC GLUTAMATE RECEPTOR GROUP III PATHWAY%PANTHER PATHWAY%P00039	Metabotropic glutamate receptor group III pathway	65	0	0.0002	-2.2935	9	neural development	7	glutamate receptors nmda
MICROTUBULE ANCHORING%GOBP%GO:0034453	microtubule anchoring	21	0.0018	0.0077	-1.8906	225	cytoskeleton	4	microtubule anchoring
MICROTUBULE BUNDLE FORMATION%GOBP%GO:0001578	microtubule bundle formation	83	0	0.002	-2.0566	84	cytoskeleton	4	axoneme assembly microtubule
MICROTUBULE-BASED TRANSPORT%GOBP%GO:0099111	microtubule-based transport	129	0	0.0011	-2.1254	44	cytoskeleton	4	transport based cytoskeletal
MITOCHONDRIAL ATP SYNTHESIS COUPLED ELECTRON TRANSPORT%GOBP%GO:0042775	mitochondrial ATP synthesis coupled electron transport	81	0	0	2.4743	13	mitochondrion	10	atp electron respiratory
MITOCHONDRIAL ELECTRON TRANSPORT, CYTOCHROME C TO OXYGEN%GOBP%GO:0006123	mitochondrial electron transport, cytochrome c to oxygen	20	0	0.0029	2.09	13	mitochondrion	10	atp electron respiratory
MITOCHONDRIAL ELECTRON TRANSPORT, NADH TO UBIQUINONE%GOBP%GO:0006120	mitochondrial electron transport, NADH to ubiquinone	46	0	0.0078	1.9892	13	mitochondrion	10	atp electron respiratory
MITOCHONDRIAL TRANSLATION ELONGATION%REACTOME%R-HSA-5389840.1	Mitochondrial translation elongation	87	0	0.0012	2.1763	33	protein translation	13	mitochondrial elongation termination
MITOCHONDRIAL TRANSLATION INITIATION%REACTOME%R-HSA-5368286.1	Mitochondrial translation initiation	87	0	0.0014	2.1628	33	protein translation	13	mitochondrial elongation termination
MITOCHONDRIAL TRANSLATION TERMINATION%REACTOME%R-HSA-5419276.1	Mitochondrial translation termination	87	0	0.0025	2.1084	33	protein translation	13	mitochondrial elongation termination
MITOCHONDRIAL TRANSLATION%REACTOME%R-HSA-5368287.1	Mitochondrial translation	93	0	0.0025	2.1063	33	protein translation	13	mitochondrial elongation termination
MITOCHONDRIAL TRANSLATIONAL ELONGATION%GOBP%GO:0070125	mitochondrial translational elongation	88	0	0.0016	2.1513	33	protein translation	13	mitochondrial elongation termination
MITOCHONDRIAL TRANSLATIONAL TERMINATION%GOBP%GO:0070126	mitochondrial translational termination	88	0	0.003	2.0865	33	protein translation	13	mitochondrial elongation termination
MITOTIC PROPHASE%REACTOME%R-HSA-68875.4	Mitotic Prophase	134	0	0.0058	-1.9253	4	transcription	5	mature sumoylation ubiquitinylation
MODIFICATION OF MORPHOLOGY OR PHYSIOLOGY OF OTHER ORGANISM%GOBP%GO:0035821	modification of morphology or physiology of other organism	133	0	0.0028	2.0968	30	immune	6	organism cells killing
MODULATION OF EXCITATORY POSTSYNAPTIC POTENTIAL%GOBP%GO:0098815	modulation of excitatory postsynaptic potential	27	0	0	-2.4307	66	neural development	7	excitatory postsynaptic neurological
MONOCYTE CHEMOTAXIS%GOBP%GO:0002548	monocyte chemotaxis	44	0	0	2.5311	10	immune	6	chemokine monocyte chemotaxis
MONONUCLEAR CELL MIGRATION%GOBP%GO:0071674	mononuclear cell migration	48	0	0	2.4892	10	immune	6	chemokine monocyte chemotaxis
MONONUCLEAR CELL PROLIFERATION%GOBP%GO:0032943	mononuclear cell proliferation	50	0	0.0027	2.0983	5	immune	6	type interferon proliferation
MOTOR NEURON AXON GUIDANCE%GOBP%GO:0008045	motor neuron axon guidance	19	0.0018	0.0025	-2.0302	35	neural development	7	motor guidance slit
MUCOSAL IMMUNE RESPONSE%GOBP%GO:0002385	mucosal immune response	32	0	0.0001	2.3833	20	immune	6	humoral response defense
MULTI-ORGANISM BEHAVIOR%GOBP%GO:0051705	multi-organism behavior	30	0	0.0053	-1.9382	60	neural development	7	learning social behavior
MULTICELLULAR ORGANISMAL SIGNALING%GOBP%GO:0035637	multicellular organismal signaling	114	0	0.0002	-2.2778	7	muscle control	8	action contraction cardiac
MUSCLE CONTRACTION%REACTOME DATABASE ID RELEASE 72%397014	Muscle contraction	200	0	0.0004	-2.2386	7	muscle control	8	action contraction cardiac
MYELOID LEUKOCYTE MIGRATION%GOBP%GO:0097529	myeloid leukocyte migration	101	0	0.0001	2.4125	10	immune	6	chemokine monocyte chemotaxis
N-CADHERIN SIGNALING EVENTS%PATHWAY INTERACTION DATABASE NCI-NATURE CURATED DATA%N-CADHERIN SIGNALING EVENTS	N-cadherin signaling events	36	0	0.0007	-2.1821	135	growth regulation	3	cadherin signaling events
N-GLYCAN PROCESSING%GOBP%GO:0006491	N-glycan processing	18	0	0.0004	-2.2449	218	ECM	9	glycan processing
NABA_BASEMENT_MEMBRANES%MSIGDB_C2%NABA_BASEMENT_MEMBRANES	NABA_BASEMENT_MEMBRANES	40	0	0	-2.5767	14	ECM	9	beta1 ecm proteoglycans
NABA_COLLAGENS%MSIGDB_C2%NABA_COLLAGENS	NABA_COLLAGENS	44	0	0	-2.868	43	ECM	9	assembly collagen formation
NABA_ECM_GLYCOPROTEINS%MSIGDB_C2%NABA_ECM_GLYCOPROTEINS	NABA_ECM_GLYCOPROTEINS	196	0	0.0042	-1.9711	14	ECM	9	beta1 ecm proteoglycans
NATURAL KILLER CELL ACTIVATION INVOLVED IN IMMUNE RESPONSE%GOBP%GO:0002323	natural killer cell activation involved in immune response	22	0	0	3.0102	5	immune	6	type interferon proliferation
NATURAL KILLER CELL ACTIVATION%GOBP%GO:0030101	natural killer cell activation	46	0	0.0009	2.2038	5	immune	6	type interferon proliferation
NCAM SIGNALING FOR NEURITE OUT-GROWTH%REACTOME DATABASE ID RELEASE 72%375165	NCAM signaling for neurite out-growth	54	0	0.0001	-2.3885	105	neural development	7	ncam signaling neurite
NCAM1 INTERACTIONS%REACTOME%R-HSA-419037.1	NCAM1 interactions	37	0	0.0009	-2.1424	105	neural development	7	ncam signaling neurite
NECTIN ADHESION PATHWAY%PATHWAY INTERACTION DATABASE NCI-NATURE CURATED DATA%NECTIN ADHESION PATHWAY	Nectin adhesion pathway	30	0	0.0001	-2.3287	42	ECM	9	nascent aj nectin
NEGATIVE CHEMOTAXIS%GOBP%GO:0050919	negative chemotaxis	32	0	0.0002	-2.3162	11	neural development	7	axon guidance negative
NEGATIVE REGULATION OF ACTIN FILAMENT BUNDLE ASSEMBLY%GOBP%GO:0032232	negative regulation of actin filament bundle assembly	24	0	0.0009	-2.1468	54	cytoskeleton	4	stress fiber assembly
NEGATIVE REGULATION OF ADHERENS JUNCTION ORGANIZATION%GOBP%GO:1903392	negative regulation of adherens junction organization	19	0	0.0022	-2.0474	32	ECM	9	matrix junction focal
NEGATIVE REGULATION OF AXON EXTENSION INVOLVED IN AXON GUIDANCE%GOBP%GO:0048843	negative regulation of axon extension involved in axon guidance	18	0	0.0011	-2.1155	11	neural development	7	axon guidance negative
NEGATIVE REGULATION OF AXON EXTENSION%GOBP%GO:0030517	negative regulation of axon extension	28	0	0.0025	-2.03	11	neural development	7	axon guidance negative
NEGATIVE REGULATION OF AXON GUIDANCE%GOBP%GO:1902668	negative regulation of axon guidance	20	0	0.0002	-2.3127	11	neural development	7	axon guidance negative
NEGATIVE REGULATION OF AXONOGENESIS%GOBP%GO:0050771	negative regulation of axonogenesis	44	0	0.0009	-2.1496	11	neural development	7	axon guidance negative
NEGATIVE REGULATION OF CELL MORPHOGENESIS INVOLVED IN DIFFERENTIATION%GOBP%GO:0010771	negative regulation of cell morphogenesis involved in differentiation	62	0	0.0003	-2.2565	11	neural development	7	axon guidance negative
NEGATIVE REGULATION OF CELL PROJECTION ORGANIZATION%GOBP%GO:0031345	negative regulation of cell projection organization	112	0	0.0007	-2.1754	11	neural development	7	axon guidance negative
NEGATIVE REGULATION OF CYTOSKELETON ORGANIZATION%GOBP%GO:0051494	negative regulation of cytoskeleton organization	113	0	0.0008	-2.165	25	cytoskeleton	4	polymerization depolymerization microtubule
NEGATIVE REGULATION OF DEVELOPMENTAL GROWTH%GOBP%GO:0048640	negative regulation of developmental growth	53	0.0017	0.0074	-1.8953	11	neural development	7	axon guidance negative
NEGATIVE REGULATION OF EPIDERMAL GROWTH FACTOR RECEPTOR SIGNALING PATHWAY%GOBP%GO:0042059	negative regulation of epidermal growth factor receptor signaling pathway	44	0	0.0014	-2.0919	70	growth regulation	3	epidermal growth erbb
NEGATIVE REGULATION OF ERBB SIGNALING PATHWAY%GOBP%GO:1901185	negative regulation of ERBB signaling pathway	49	0	0.0015	-2.0909	70	growth regulation	3	epidermal growth erbb
NEGATIVE REGULATION OF EXECUTION PHASE OF APOPTOSIS%GOBP%GO:1900118	negative regulation of execution phase of apoptosis	18	0	0	2.617	128	cell death	12	execution phase apoptosis
NEGATIVE REGULATION OF FOCAL ADHESION ASSEMBLY%GOBP%GO:0051895	negative regulation of focal adhesion assembly	16	0	0.0057	-1.9305	32	ECM	9	matrix junction focal
NEGATIVE REGULATION OF MICROTUBULE POLYMERIZATION OR DEPOLYMERIZATION%GOBP%GO:0031111	negative regulation of microtubule polymerization or depolymerization	31	0.0018	0.0054	-1.9367	25	cytoskeleton	4	polymerization depolymerization microtubule
NEGATIVE REGULATION OF NEURON PROJECTION DEVELOPMENT%GOBP%GO:0010977	negative regulation of neuron projection development	86	0	0.0006	-2.1969	11	neural development	7	axon guidance negative
NEGATIVE REGULATION OF NMDA RECEPTOR-MEDIATED NEURONAL TRANSMISSION%REACTOME%R-HSA-9617324.1	Negative regulation of NMDA receptor-mediated neuronal transmission	20	0.0019	0.005	-1.9496	9	neural development	7	glutamate receptors nmda
NEGATIVE REGULATION OF PROTEIN COMPLEX DISASSEMBLY%GOBP%GO:0043242	negative regulation of protein complex disassembly	50	0	0.0057	-1.9275	25	cytoskeleton	4	polymerization depolymerization microtubule
NEGATIVE REGULATION OF PROTEIN DEPOLYMERIZATION%GOBP%GO:1901880	negative regulation of protein depolymerization	39	0.0016	0.0019	-2.0622	25	cytoskeleton	4	polymerization depolymerization microtubule
NEGATIVE REGULATION OF RAS PROTEIN SIGNAL TRANSDUCTION%GOBP%GO:0046580	negative regulation of Ras protein signal transduction	36	0	0.0012	-2.1083	71	growth regulation	3	gtpase signal transduction
NEGATIVE REGULATION OF RHO PROTEIN SIGNAL TRANSDUCTION%GOBP%GO:0035024	negative regulation of Rho protein signal transduction	19	0	0.0011	-2.1217	71	growth regulation	3	gtpase signal transduction
NEGATIVE REGULATION OF SEQUESTERING OF CALCIUM ION%GOBP%GO:0051283	negative regulation of sequestering of calcium ion	46	0.0018	0.007	-1.9029	8	muscle control	8	calcium inositol phosphate
NEGATIVE REGULATION OF SMALL GTPASE MEDIATED SIGNAL TRANSDUCTION%GOBP%GO:0051058	negative regulation of small GTPase mediated signal transduction	43	0	0.0001	-2.4141	71	growth regulation	3	gtpase signal transduction
NEGATIVE REGULATION OF SMOOTHENED SIGNALING PATHWAY%GOBP%GO:0045879	negative regulation of smoothened signaling pathway	24	0.0036	0.01	-1.8562	149	growth regulation	3	regulation smoothened pathway
NEGATIVE REGULATION OF SODIUM ION TRANSPORT%GOBP%GO:0010766	negative regulation of sodium ion transport	15	0	0	-2.4982	78	muscle control	8	sodium ion transporter
NEGATIVE REGULATION OF STRESS FIBER ASSEMBLY%GOBP%GO:0051497	negative regulation of stress fiber assembly	22	0	0.0008	-2.1603	54	cytoskeleton	4	stress fiber assembly
NEGATIVE REGULATION OF SUPRAMOLECULAR FIBER ORGANIZATION%GOBP%GO:1902904	negative regulation of supramolecular fiber organization	105	0	0.0011	-2.1138	25	cytoskeleton	4	polymerization depolymerization microtubule
NEGATIVE REGULATION OF THE PI3K AKT NETWORK%REACTOME DATABASE ID RELEASE 72%199418	Negative regulation of the PI3K AKT network	96	0	0.0068	-1.9071	24	growth regulation	3	pi3k cancer erbb4
NEP NS2 INTERACTS WITH THE CELLULAR EXPORT MACHINERY%REACTOME%R-HSA-168333.3	NEP NS2 Interacts with the Cellular Export Machinery	28	0	0.0056	-1.9328	4	transcription	5	mature sumoylation ubiquitinylation
NEPHRIN FAMILY INTERACTIONS%REACTOME%R-HSA-373753.3	Nephrin family interactions	22	0	0.0001	-2.3173	16	ECM	9	nephrin neph1 junction
NETRIN-1 SIGNALING%REACTOME%R-HSA-373752.2	Netrin-1 signaling	49	0	0	-2.7862	6	neural development	7	leishmania phagocytosis engulfment
NETRIN-MEDIATED SIGNALING EVENTS%PATHWAY INTERACTION DATABASE NCI-NATURE CURATED DATA%NETRIN-MEDIATED SIGNALING EVENTS	Netrin-mediated signaling events	32	0	0.0001	-2.4012	6	neural development	7	leishmania phagocytosis engulfment
NEUREXINS AND NEUROLIGINS%REACTOME DATABASE ID RELEASE 72%6794361	Neurexins and neuroligins	56	0	0	-2.9442	53	ECM	9	phosphatases neurexins neuroligins
NEUROMUSCULAR JUNCTION DEVELOPMENT%GOBP%GO:0007528	neuromuscular junction development	27	0	0	-2.4605	19	neural development	7	dendritic spine presynapse
NEURON MIGRATION%GOBP%GO:0001764	neuron migration	51	0	0.0001	-2.3755	178	neural development	7	neuron migration
NEURON PROJECTION EXTENSION%GOBP%GO:1990138	neuron projection extension	36	0	0.0001	-2.3376	39	neural development	7	developmental growth morphogenesis
NEURON PROJECTION GUIDANCE%GOBP%GO:0097485	neuron projection guidance	198	0	0	-2.8656	35	neural development	7	motor guidance slit
NEURON PROJECTION ORGANIZATION%GOBP%GO:0106027	neuron projection organization	34	0	0.0012	-2.1044	19	neural development	7	dendritic spine presynapse
NEURON RECOGNITION%GOBP%GO:0008038	neuron recognition	35	0	0	-2.4162	62	ECM	9	plasma adhesion molecules
NEURONAL ACTION POTENTIAL%GOBP%GO:0019228	neuronal action potential	22	0	0.0004	-2.2447	7	muscle control	8	action contraction cardiac
NEUROTRANSMITTER RECEPTOR TRANSPORT%GOBP%GO:0099637	neurotransmitter receptor transport	17	0.0019	0.0005	-2.2111	17	neural development	7	protein localization periphery
NEUROTRANSMITTER RECEPTORS AND POSTSYNAPTIC SIGNAL TRANSMISSION%REACTOME%R-HSA-112314.7	Neurotransmitter receptors and postsynaptic signal transmission	176	0	0	-2.5797	9	neural development	7	glutamate receptors nmda
NEUROTROPHIC FACTOR-MEDIATED TRK RECEPTOR SIGNALING%PATHWAY INTERACTION DATABASE NCI-NATURE CURATED DATA%NEUROTROPHIC FACTOR-MEDIATED TRK RECEPTOR SIGNALING	Neurotrophic factor-mediated Trk receptor signaling	60	0	0.0004	-2.2337	132	growth regulation	3	neurotrophic factor mediated
NEUTROPHIL CHEMOTAXIS%GOBP%GO:0030593	neutrophil chemotaxis	66	0	0	2.6307	10	immune	6	chemokine monocyte chemotaxis
NEUTROPHIL MIGRATION%GOBP%GO:1990266	neutrophil migration	71	0	0	2.6576	10	immune	6	chemokine monocyte chemotaxis
NITRIC OXIDE STIMULATES GUANYLATE CYCLASE%REACTOME DATABASE ID RELEASE 72%392154	Nitric oxide stimulates guanylate cyclase	21	0	0.0001	-2.3946	77	immune	6	nitric platelet homeostasis
NLS-BEARING PROTEIN IMPORT INTO NUCLEUS%GOBP%GO:0006607	NLS-bearing protein import into nucleus	20	0	0.0028	-2.0175	4	transcription	5	mature sumoylation ubiquitinylation
NON-INTEGRIN MEMBRANE-ECM INTERACTIONS%REACTOME DATABASE ID RELEASE 72%3000171	Non-integrin membrane-ECM interactions	42	0	0.0001	-2.3538	14	ECM	9	beta1 ecm proteoglycans
NON-RECOMBINATIONAL REPAIR%GOBP%GO:0000726	non-recombinational repair	79	0	0.0087	-1.8768	151	transcription	5	repair end joining
NONSENSE MEDIATED DECAY (NMD) ENHANCED BY THE EXON JUNCTION COMPLEX (EJC)%REACTOME%R-HSA-975957.1	Nonsense Mediated Decay (NMD) enhanced by the Exon Junction Complex (EJC)	116	0	0	2.977	1	protein translation	13	complex decay targeting
NONSENSE MEDIATED DECAY (NMD) INDEPENDENT OF THE EXON JUNCTION COMPLEX (EJC)%REACTOME DATABASE ID RELEASE 72%975956	Nonsense Mediated Decay (NMD) independent of the Exon Junction Complex (EJC)	96	0	0	3.3507	1	protein translation	13	complex decay targeting
NONSENSE-MEDIATED DECAY (NMD)%REACTOME DATABASE ID RELEASE 72%927802	Nonsense-Mediated Decay (NMD)	116	0	0	2.9525	1	protein translation	13	complex decay targeting
NOTCH SIGNALING PATHWAY%PATHWAY INTERACTION DATABASE NCI-NATURE CURATED DATA%NOTCH SIGNALING PATHWAY	Notch signaling pathway	58	0	0.0044	-1.9657	147	growth regulation	3	notch signaling pathway
NOTCH-HLH TRANSCRIPTION PATHWAY%REACTOME%R-HSA-350054.3	Notch-HLH transcription pathway	28	0	0.0005	-2.2137	85	transcription	5	hlh transcription notch
NRAGE SIGNALS DEATH THROUGH JNK%REACTOME DATABASE ID RELEASE 72%193648	NRAGE signals death through JNK	59	0	0	-2.7097	23	cell death	12	signals death jnk
NS1 MEDIATED EFFECTS ON HOST PATHWAYS%REACTOME%R-HSA-168276.5	NS1 Mediated Effects on Host Pathways	37	0.0018	0.0068	-1.9071	4	transcription	5	mature sumoylation ubiquitinylation
NUCLEAR ENVELOPE BREAKDOWN%REACTOME%R-HSA-2980766.2	Nuclear Envelope Breakdown	46	0	0.0069	-1.9061	4	transcription	5	mature sumoylation ubiquitinylation
NUCLEAR PORE COMPLEX (NPC) DISASSEMBLY%REACTOME DATABASE ID RELEASE 72%3301854	Nuclear Pore Complex (NPC) Disassembly	32	0	0.0026	-2.0251	4	transcription	5	mature sumoylation ubiquitinylation
NUCLEAR RECEPTOR TRANSCRIPTION PATHWAY%REACTOME%R-HSA-383280.1	Nuclear Receptor transcription pathway	41	0	0.0034	-1.9949	64	transcription	5	rxr rar heterodimerization
NUCLEAR-TRANSCRIBED MRNA CATABOLIC PROCESS, NONSENSE-MEDIATED DECAY%GOBP%GO:0000184	nuclear-transcribed mRNA catabolic process, nonsense-mediated decay	113	0	0	2.7995	1	protein translation	13	complex decay targeting
NUCLEAR-TRANSCRIBED MRNA POLY(A) TAIL SHORTENING%GOBP%GO:0000289	nuclear-transcribed mRNA poly(A) tail shortening	20	0	0.0009	-2.1521	165	transcription	5	nuclear transcribed mrna
NUCLEOBASE METABOLIC PROCESS%GOBP%GO:0009112	nucleobase metabolic process	30	0.0018	0.0019	-2.0634	180	neural development	7	nucleobase metabolic process
O-GLYCOSYLATION OF TSR DOMAIN-CONTAINING PROTEINS%REACTOME%R-HSA-5173214.1	O-glycosylation of TSR domain-containing proteins	37	0	0	-2.4627	63	neural development	7	glycosylation domain proteins
O-LINKED GLYCOSYLATION%REACTOME%R-HSA-5173105.4	O-linked glycosylation	108	0	0.0024	-2.0349	63	neural development	7	glycosylation domain proteins
OLFACTORY LOBE DEVELOPMENT%GOBP%GO:0021988	olfactory lobe development	15	0	0.0005	-2.2158	18	neural development	7	forebrain neurons development
ONCOGENIC MAPK SIGNALING%REACTOME%R-HSA-6802957.4	Oncogenic MAPK signaling	69	0	0.0002	-2.2819	122	growth regulation	3	oncogenic braf raf
OPIOID SIGNALLING%REACTOME DATABASE ID RELEASE 72%111885	Opioid Signalling	89	0	0.0009	-2.1564	2	muscle control	8	pka glucagon endothelin
ORGAN OR TISSUE SPECIFIC IMMUNE RESPONSE%GOBP%GO:0002251	organ or tissue specific immune response	34	0	0.0003	2.3155	20	immune	6	humoral response defense
ORGANELLE LOCALIZATION BY MEMBRANE TETHERING%GOBP%GO:0140056	organelle localization by membrane tethering	152	0	0.0038	-1.9804	52	cytoskeleton	4	basal body docking
OTHER SEMAPHORIN INTERACTIONS%REACTOME%R-HSA-416700.1	Other semaphorin interactions	19	0	0.0024	-2.0342	48	growth regulation	3	paks semaphorin interactions
OUTFLOW TRACT SEPTUM MORPHOGENESIS%GOBP%GO:0003148	outflow tract septum morphogenesis	24	0.0018	0.0083	-1.8826	209	development	2	outflow tract septum
OXIDATIVE PHOSPHORYLATION%GOBP%GO:0006119	oxidative phosphorylation	105	0	0	2.6478	13	mitochondrion	10	atp electron respiratory
P75 NTR RECEPTOR-MEDIATED SIGNALLING%REACTOME%R-HSA-193704.1	p75 NTR receptor-mediated signalling	96	0	0.0008	-2.1629	23	cell death	12	signals death jnk
PALLIUM DEVELOPMENT%GOBP%GO:0021543	pallium development	56	0	0	-2.4209	18	neural development	7	forebrain neurons development
PAR1-MEDIATED THROMBIN SIGNALING EVENTS%PATHWAY INTERACTION DATABASE NCI-NATURE CURATED DATA%PAR1-MEDIATED THROMBIN SIGNALING EVENTS	PAR1-mediated thrombin signaling events	43	0	0.0019	-2.0618	127	growth regulation	3	mediated thrombin par1
PARASITE INFECTION%REACTOME%R-HSA-9664407.1	Parasite infection	67	0	0.0001	-2.4123	6	neural development	7	leishmania phagocytosis engulfment
PDGF SIGNALING PATHWAY%PANTHER PATHWAY%P00047	PDGF signaling pathway	125	0	0	-2.5444	94	growth regulation	3	pdgf signaling pathway
PDGFR-BETA SIGNALING PATHWAY%PATHWAY INTERACTION DATABASE NCI-NATURE CURATED DATA%PDGFR-BETA SIGNALING PATHWAY	PDGFR-beta signaling pathway	125	0	0.0001	-2.32	27	growth regulation	3	erbb1 proximal downstream
PEPTIDE CHAIN ELONGATION%REACTOME%R-HSA-156902.2	Peptide chain elongation	90	0	0	3.3524	1	protein translation	13	complex decay targeting
PEPTIDE LIGAND-BINDING RECEPTORS%REACTOME%R-HSA-375276.5	Peptide ligand-binding receptors	195	0	0	2.8535	10	immune	6	chemokine monocyte chemotaxis
PEPTIDYL-SERINE MODIFICATION%GOBP%GO:0018209	peptidyl-serine modification	168	0	0	-2.5218	68	growth regulation	3	peptidyl threonine phosphorylation
PEPTIDYL-SERINE PHOSPHORYLATION%GOBP%GO:0018105	peptidyl-serine phosphorylation	150	0	0	-2.5838	68	growth regulation	3	peptidyl threonine phosphorylation
PEPTIDYL-THREONINE MODIFICATION%GOBP%GO:0018210	peptidyl-threonine modification	74	0	0.0003	-2.2725	68	growth regulation	3	peptidyl threonine phosphorylation
PEPTIDYL-THREONINE PHOSPHORYLATION%GOBP%GO:0018107	peptidyl-threonine phosphorylation	65	0	0.0007	-2.1789	68	growth regulation	3	peptidyl threonine phosphorylation
PEPTIDYL-TYROSINE AUTOPHOSPHORYLATION%GOBP%GO:0038083	peptidyl-tyrosine autophosphorylation	29	0	0.0079	-1.8875	67	growth regulation	3	peptidyl tyrosine autophosphorylation
PEPTIDYL-TYROSINE MODIFICATION%GOBP%GO:0018212	peptidyl-tyrosine modification	75	0	0	-2.4481	67	growth regulation	3	peptidyl tyrosine autophosphorylation
PEPTIDYL-TYROSINE PHOSPHORYLATION%GOBP%GO:0018108	peptidyl-tyrosine phosphorylation	72	0	0.0001	-2.3239	67	growth regulation	3	peptidyl tyrosine autophosphorylation
PHAGOCYTOSIS, ENGULFMENT%GOBP%GO:0006911	phagocytosis, engulfment	75	0	0.0057	-1.9307	6	neural development	7	leishmania phagocytosis engulfment
PHAGOCYTOSIS%GOBP%GO:0006909	phagocytosis	213	0	0.0085	-1.879	6	neural development	7	leishmania phagocytosis engulfment
PHASE 0 - RAPID DEPOLARISATION%REACTOME DATABASE ID RELEASE 72%5576892	Phase 0 - rapid depolarisation	41	0	0	-2.5749	7	muscle control	8	action contraction cardiac
PHASE 2 - PLATEAU PHASE%REACTOME DATABASE ID RELEASE 72%5576893	Phase 2 - plateau phase	25	0	0.0009	-2.1513	7	muscle control	8	action contraction cardiac
PHOSPHATIDYLINOSITOL 3-KINASE SIGNALING%GOBP%GO:0014065	phosphatidylinositol 3-kinase signaling	32	0	0.0033	-1.999	158	growth regulation	3	phosphatidylinositol 3 kinase
PHOSPHATIDYLINOSITOL BIOSYNTHETIC PROCESS%GOBP%GO:0006661	phosphatidylinositol biosynthetic process	106	0	0.0011	-2.127	15	cytoskeleton	4	synthesis pips phosphatidylinositol
PHOSPHATIDYLINOSITOL DEPHOSPHORYLATION%GOBP%GO:0046856	phosphatidylinositol dephosphorylation	23	0.0018	0.0086	-1.8775	15	cytoskeleton	4	synthesis pips phosphatidylinositol
PHOSPHATIDYLINOSITOL METABOLIC PROCESS%GOBP%GO:0046488	phosphatidylinositol metabolic process	153	0	0.0034	-1.9932	15	cytoskeleton	4	synthesis pips phosphatidylinositol
PHOSPHATIDYLINOSITOL-MEDIATED SIGNALING%GOBP%GO:0048015	phosphatidylinositol-mediated signaling	70	0	0.0001	-2.3827	8	muscle control	8	calcium inositol phosphate
PHOSPHOLIPID DEPHOSPHORYLATION%GOBP%GO:0046839	phospholipid dephosphorylation	32	0.0054	0.0044	-1.9655	15	cytoskeleton	4	synthesis pips phosphatidylinositol
PHOSPHOLIPID METABOLISM%REACTOME DATABASE ID RELEASE 72%1483257	Phospholipid metabolism	207	0	0.0007	-2.1696	15	cytoskeleton	4	synthesis pips phosphatidylinositol
PHOSPHOLIPID TRANSLOCATION%GOBP%GO:0045332	phospholipid translocation	23	0	0	-2.5733	73	cytoskeleton	4	translocation distribution atpases
PI METABOLISM%REACTOME%R-HSA-1483255.5	PI Metabolism	82	0	0	-2.5138	15	cytoskeleton	4	synthesis pips phosphatidylinositol
PI3 KINASE PATHWAY%PANTHER PATHWAY%P00048	PI3 kinase pathway	43	0	0.0042	-1.9691	164	growth regulation	3	pi3 kinase pathway
PI3K AKT SIGNALING IN CANCER%REACTOME%R-HSA-2219528.1	PI3K AKT Signaling in Cancer	89	0	0.0058	-1.9251	24	growth regulation	3	pi3k cancer erbb4
PID_AJDISS_2PATHWAY%MSIGDB_C2%PID_AJDISS_2PATHWAY	PID_AJDISS_2PATHWAY	48	0	0.0017	-2.0703	145	cell communication	20	posttranslational regulation adherens
PID_ANGIOPOIETIN_RECEPTOR_PATHWAY%MSIGDB_C2%PID_ANGIOPOIETIN_RECEPTOR_PATHWAY	PID_ANGIOPOIETIN_RECEPTOR_PATHWAY	50	0	0.0024	-2.0384	134	growth regulation	3	angiopoietin tie2 mediated
PID_AR_PATHWAY%MSIGDB_C2%PID_AR_PATHWAY	PID_AR_PATHWAY	61	0.0017	0.0072	-1.9001	142	growth regulation	3	coregulation androgen receptor
PID_ARF6_PATHWAY%MSIGDB_C2%PID_ARF6_PATHWAY	PID_ARF6_PATHWAY	35	0	0.0065	-1.9139	129	cytoskeleton	4	arf6 signaling events
PID_ARF6_TRAFFICKING_PATHWAY%MSIGDB_C2%PID_ARF6_TRAFFICKING_PATHWAY	PID_ARF6_TRAFFICKING_PATHWAY	49	0	0.0025	-2.0304	140	cytoskeleton	4	arf6 trafficking pathway
PID_ATM_PATHWAY%MSIGDB_C2%PID_ATM_PATHWAY	PID_ATM_PATHWAY	34	0.0037	0.0096	-1.863	47	neural development	7	hdr strand exchange
PID_AVB3_INTEGRIN_PATHWAY%MSIGDB_C2%PID_AVB3_INTEGRIN_PATHWAY	PID_AVB3_INTEGRIN_PATHWAY	75	0	0.0001	-2.4045	12	ECM	9	hepatocyte vegfr3 angiogenesis
PID_BCR_5PATHWAY%MSIGDB_C2%PID_BCR_5PATHWAY	PID_BCR_5PATHWAY	65	0	0.0057	-1.9303	3	immune	6	scf kit epo
PID_CDC42_PATHWAY%MSIGDB_C2%PID_CDC42_PATHWAY	PID_CDC42_PATHWAY	70	0	0.0008	-2.1624	136	transcription	5	cdc42 signaling events
PID_CDC42_REG_PATHWAY%MSIGDB_C2%PID_CDC42_REG_PATHWAY	PID_CDC42_REG_PATHWAY	30	0	0.0004	-2.2408	154	transcription	5	regulation cdc42 reg
PID_CXCR4_PATHWAY%MSIGDB_C2%PID_CXCR4_PATHWAY	PID_CXCR4_PATHWAY	102	0	0.0009	-2.1493	38	ECM	9	integrin family cs
PID_ECADHERIN_KERATINOCYTE_PATHWAY%MSIGDB_C2%PID_ECADHERIN_KERATINOCYTE_PATHWAY	PID_ECADHERIN_KERATINOCYTE_PATHWAY	21	0.0018	0.0047	-1.9584	42	ECM	9	nascent aj nectin
PID_ECADHERIN_NASCENT_AJ_PATHWAY%MSIGDB_C2%PID_ECADHERIN_NASCENT_AJ_PATHWAY	PID_ECADHERIN_NASCENT_AJ_PATHWAY	39	0	0.0011	-2.1217	42	ECM	9	nascent aj nectin
PID_ECADHERIN_STABILIZATION_PATHWAY%MSIGDB_C2%PID_ECADHERIN_STABILIZATION_PATHWAY	PID_ECADHERIN_STABILIZATION_PATHWAY	42	0	0.0011	-2.1248	124	ECM	9	stabilization pathway expansion
PID_ENDOTHELIN_PATHWAY%MSIGDB_C2%PID_ENDOTHELIN_PATHWAY	PID_ENDOTHELIN_PATHWAY	63	0	0.0006	-2.1967	2	muscle control	8	pka glucagon endothelin
PID_EPHA_FWDPATHWAY%MSIGDB_C2%PID_EPHA_FWDPATHWAY	PID_EPHA_FWDPATHWAY	34	0.0036	0.0091	-1.8712	45	growth regulation	3	eph ephrin signaling
PID_EPHB_FWD_PATHWAY%MSIGDB_C2%PID_EPHB_FWD_PATHWAY	PID_EPHB_FWD_PATHWAY	40	0	0.0057	-1.9295	45	growth regulation	3	eph ephrin signaling
PID_EPO_PATHWAY%MSIGDB_C2%PID_EPO_PATHWAY	PID_EPO_PATHWAY	34	0	0.0022	-2.0441	3	immune	6	scf kit epo
PID_ER_NONGENOMIC_PATHWAY%MSIGDB_C2%PID_ER_NONGENOMIC_PATHWAY	PID_ER_NONGENOMIC_PATHWAY	41	0	0.0014	-2.0938	65	growth regulation	3	nongenomic estrogen lpa
PID_ERBB_NETWORK_PATHWAY%MSIGDB_C2%PID_ERBB_NETWORK_PATHWAY	PID_ERBB_NETWORK_PATHWAY	15	0	0.0074	-1.8972	24	growth regulation	3	pi3k cancer erbb4
PID_ERBB1_DOWNSTREAM_PATHWAY%MSIGDB_C2%PID_ERBB1_DOWNSTREAM_PATHWAY	PID_ERBB1_DOWNSTREAM_PATHWAY	105	0	0.0049	-1.9496	27	growth regulation	3	erbb1 proximal downstream
PID_ERBB1_INTERNALIZATION_PATHWAY%MSIGDB_C2%PID_ERBB1_INTERNALIZATION_PATHWAY	PID_ERBB1_INTERNALIZATION_PATHWAY	41	0	0.0001	-2.3718	144	growth regulation	3	erbb1 internalization pathway
PID_ERBB1_RECEPTOR_PROXIMAL_PATHWAY%MSIGDB_C2%PID_ERBB1_RECEPTOR_PROXIMAL_PATHWAY	PID_ERBB1_RECEPTOR_PROXIMAL_PATHWAY	35	0	0.0004	-2.2468	27	growth regulation	3	erbb1 proximal downstream
PID_ERBB2_ERBB3_PATHWAY%MSIGDB_C2%PID_ERBB2_ERBB3_PATHWAY	PID_ERBB2_ERBB3_PATHWAY	44	0	0.005	-1.9473	107	growth regulation	3	erbb2 erbb3 signaling
PID_ERBB4_PATHWAY%MSIGDB_C2%PID_ERBB4_PATHWAY	PID_ERBB4_PATHWAY	38	0	0	-2.6174	24	growth regulation	3	pi3k cancer erbb4
PID_FAK_PATHWAY%MSIGDB_C2%PID_FAK_PATHWAY	PID_FAK_PATHWAY	59	0	0	-2.5606	27	growth regulation	3	erbb1 proximal downstream
PID_FCER1_PATHWAY%MSIGDB_C2%PID_FCER1_PATHWAY	PID_FCER1_PATHWAY	61	0	0.0049	-1.9523	3	immune	6	scf kit epo
PID_GLYPICAN_1PATHWAY%MSIGDB_C2%PID_GLYPICAN_1PATHWAY	PID_GLYPICAN_1PATHWAY	27	0.0018	0.0079	-1.8882	103	development	2	glypican 1pathway 1
PID_HEDGEHOG_GLI_PATHWAY%MSIGDB_C2%PID_HEDGEHOG_GLI_PATHWAY	PID_HEDGEHOG_GLI_PATHWAY	48	0	0.0099	-1.8576	87	growth regulation	3	hedgehog signaling gli
PID_IGF1_PATHWAY%MSIGDB_C2%PID_IGF1_PATHWAY	PID_IGF1_PATHWAY	30	0	0.0053	-1.9396	41	growth regulation	3	igf1 insulin pathway
PID_IL8_CXCR2_PATHWAY%MSIGDB_C2%PID_IL8_CXCR2_PATHWAY	PID_IL8_CXCR2_PATHWAY	34	0	0.0057	-1.9282	75	immune	6	il8 cxcr2 thromboxane
PID_INSULIN_PATHWAY%MSIGDB_C2%PID_INSULIN_PATHWAY	PID_INSULIN_PATHWAY	45	0	0.0032	-2.0022	41	growth regulation	3	igf1 insulin pathway
PID_INTEGRIN_CS_PATHWAY%MSIGDB_C2%PID_INTEGRIN_CS_PATHWAY	PID_INTEGRIN_CS_PATHWAY	26	0	0.0026	-2.025	38	ECM	9	integrin family cs
PID_INTEGRIN1_PATHWAY%MSIGDB_C2%PID_INTEGRIN1_PATHWAY	PID_INTEGRIN1_PATHWAY	66	0	0.0006	-2.1972	14	ECM	9	beta1 ecm proteoglycans
PID_KIT_PATHWAY%MSIGDB_C2%PID_KIT_PATHWAY	PID_KIT_PATHWAY	52	0	0.0007	-2.1808	3	immune	6	scf kit epo
PID_LPA4_PATHWAY%MSIGDB_C2%PID_LPA4_PATHWAY	PID_LPA4_PATHWAY	15	0	0.0015	-2.0897	2	muscle control	8	pka glucagon endothelin
PID_LYMPH_ANGIOGENESIS_PATHWAY%MSIGDB_C2%PID_LYMPH_ANGIOGENESIS_PATHWAY	PID_LYMPH_ANGIOGENESIS_PATHWAY	25	0.0073	0.0057	-1.9291	12	ECM	9	hepatocyte vegfr3 angiogenesis
PID_LYSOPHOSPHOLIPID_PATHWAY%MSIGDB_C2%PID_LYSOPHOSPHOLIPID_PATHWAY	PID_LYSOPHOSPHOLIPID_PATHWAY	66	0	0.002	-2.0545	65	growth regulation	3	nongenomic estrogen lpa
PID_MET_PATHWAY%MSIGDB_C2%PID_MET_PATHWAY	PID_MET_PATHWAY	80	0	0.0001	-2.3883	12	ECM	9	hepatocyte vegfr3 angiogenesis
PID_NCADHERIN_PATHWAY%MSIGDB_C2%PID_NCADHERIN_PATHWAY	PID_NCADHERIN_PATHWAY	33	0.0018	0.0002	-2.2751	135	growth regulation	3	cadherin signaling events
PID_NECTIN_PATHWAY%MSIGDB_C2%PID_NECTIN_PATHWAY	PID_NECTIN_PATHWAY	30	0	0.0002	-2.3159	42	ECM	9	nascent aj nectin
PID_NEPHRIN_NEPH1_PATHWAY%MSIGDB_C2%PID_NEPHRIN_NEPH1_PATHWAY	PID_NEPHRIN_NEPH1_PATHWAY	31	0	0.0043	-1.9684	16	ECM	9	nephrin neph1 junction
PID_NETRIN_PATHWAY%MSIGDB_C2%PID_NETRIN_PATHWAY	PID_NETRIN_PATHWAY	32	0	0.0001	-2.4025	6	neural development	7	leishmania phagocytosis engulfment
PID_NFAT_3PATHWAY%MSIGDB_C2%PID_NFAT_3PATHWAY	PID_NFAT_3PATHWAY	54	0.0017	0.0043	-1.9668	148	muscle control	8	dependent nfat lymphocytes
PID_NOTCH_PATHWAY%MSIGDB_C2%PID_NOTCH_PATHWAY	PID_NOTCH_PATHWAY	59	0	0.005	-1.9496	147	growth regulation	3	notch signaling pathway
PID_P38_ALPHA_BETA_PATHWAY%MSIGDB_C2%PID_P38_ALPHA_BETA_PATHWAY	PID_P38_ALPHA_BETA_PATHWAY	31	0.0018	0.0061	-1.9209	110	cell death	12	regulation p38 pathway
PID_PDGFRB_PATHWAY%MSIGDB_C2%PID_PDGFRB_PATHWAY	PID_PDGFRB_PATHWAY	129	0	0.0001	-2.3439	27	growth regulation	3	erbb1 proximal downstream
PID_PI3KCI_PATHWAY%MSIGDB_C2%PID_PI3KCI_PATHWAY	PID_PI3KCI_PATHWAY	49	0	0.0034	-1.9931	83	immune	6	interleukin 5 gm
PID_RAC1_REG_PATHWAY%MSIGDB_C2%PID_RAC1_REG_PATHWAY	PID_RAC1_REG_PATHWAY	38	0	0	-2.7485	111	transcription	5	regulation rac1 pathway
PID_RAS_PATHWAY%MSIGDB_C2%PID_RAS_PATHWAY	PID_RAS_PATHWAY	30	0	0.0011	-2.1255	93	growth regulation	3	regulation ras family
PID_REELIN_PATHWAY%MSIGDB_C2%PID_REELIN_PATHWAY	PID_REELIN_PATHWAY	29	0	0.0002	-2.2823	139	growth regulation	3	reelin signaling pathway
PID_RET_PATHWAY%MSIGDB_C2%PID_RET_PATHWAY	PID_RET_PATHWAY	38	0.0017	0.0072	-1.8997	35	neural development	7	motor guidance slit
PID_RETINOIC_ACID_PATHWAY%MSIGDB_C2%PID_RETINOIC_ACID_PATHWAY	PID_RETINOIC_ACID_PATHWAY	30	0	0.0001	-2.3675	125	growth regulation	3	retinoic acid mediated
PID_RHOA_REG_PATHWAY%MSIGDB_C2%PID_RHOA_REG_PATHWAY	PID_RHOA_REG_PATHWAY	46	0	0.0001	-2.3966	23	cell death	12	signals death jnk
PID_SHP2_PATHWAY%MSIGDB_C2%PID_SHP2_PATHWAY	PID_SHP2_PATHWAY	58	0	0.0024	-2.0348	109	growth regulation	3	shp2 signaling pathway
PID_SYNDECAN_1_PATHWAY%MSIGDB_C2%PID_SYNDECAN_1_PATHWAY	PID_SYNDECAN_1_PATHWAY	46	0.0017	0.008	-1.8866	43	ECM	9	assembly collagen formation
PID_TCPTP_PATHWAY%MSIGDB_C2%PID_TCPTP_PATHWAY	PID_TCPTP_PATHWAY	43	0	0.0003	-2.2517	100	growth regulation	3	signaling tcptp pathway
PID_TCR_PATHWAY%MSIGDB_C2%PID_TCR_PATHWAY	PID_TCR_PATHWAY	66	0	0.0049	-1.9524	101	immune	6	tcr signaling cells
PID_TGFBR_PATHWAY%MSIGDB_C2%PID_TGFBR_PATHWAY	PID_TGFBR_PATHWAY	55	0	0.0011	-2.1239	36	growth regulation	3	tgf tgfbr tgfb
PID_THROMBIN_PAR1_PATHWAY%MSIGDB_C2%PID_THROMBIN_PAR1_PATHWAY	PID_THROMBIN_PAR1_PATHWAY	43	0	0.0019	-2.0595	127	growth regulation	3	mediated thrombin par1
PID_TRKR_PATHWAY%MSIGDB_C2%PID_TRKR_PATHWAY	PID_TRKR_PATHWAY	62	0	0.0002	-2.284	132	growth regulation	3	neurotrophic factor mediated
PID_TXA2PATHWAY%MSIGDB_C2%PID_TXA2PATHWAY	PID_TXA2PATHWAY	57	0	0.0015	-2.0865	75	immune	6	il8 cxcr2 thromboxane
PID_VEGFR1_2_PATHWAY%MSIGDB_C2%PID_VEGFR1_2_PATHWAY	PID_VEGFR1_2_PATHWAY	69	0	0.0001	-2.4054	31	growth regulation	3	vegfa vegfr2 vegfr1
PID_VEGFR1_PATHWAY%MSIGDB_C2%PID_VEGFR1_PATHWAY	PID_VEGFR1_PATHWAY	26	0	0.0064	-1.9155	31	growth regulation	3	vegfa vegfr2 vegfr1
PKA ACTIVATION IN GLUCAGON SIGNALLING%REACTOME%R-HSA-164378.2	PKA activation in glucagon signalling	17	0.0054	0.0019	-2.0657	2	muscle control	8	pka glucagon endothelin
PKA ACTIVATION%REACTOME DATABASE ID RELEASE 72%163615	PKA activation	17	0	0.0014	-2.0941	2	muscle control	8	pka glucagon endothelin
PKA-MEDIATED PHOSPHORYLATION OF CREB%REACTOME%R-HSA-111931.1	PKA-mediated phosphorylation of CREB	19	0	0.0009	-2.1502	2	muscle control	8	pka glucagon endothelin
PKMTS METHYLATE HISTONE LYSINES%REACTOME DATABASE ID RELEASE 72%3214841	PKMTs methylate histone lysines	71	0	0.0025	-2.0313	55	transcription	5	pkmts chromatin organization
PLASMA MEMBRANE ESTROGEN RECEPTOR SIGNALING%PATHWAY INTERACTION DATABASE NCI-NATURE CURATED DATA%PLASMA MEMBRANE ESTROGEN RECEPTOR SIGNALING	Plasma membrane estrogen receptor signaling	40	0	0.0012	-2.1063	65	growth regulation	3	nongenomic estrogen lpa
PLASMA MEMBRANE ORGANIZATION%GOBP%GO:0007009	plasma membrane organization	75	0	0.0042	-1.9718	92	cell polarity and organization	14	biogenesis membrane organization
PLATELET CALCIUM HOMEOSTASIS%REACTOME%R-HSA-418360.1	Platelet calcium homeostasis	27	0	0.0023	-2.039	77	immune	6	nitric platelet homeostasis
PLATELET HOMEOSTASIS%REACTOME%R-HSA-418346.2	Platelet homeostasis	83	0	0.0004	-2.2132	77	immune	6	nitric platelet homeostasis
PLATELET-DERIVED GROWTH FACTOR RECEPTOR SIGNALING PATHWAY%GOBP%GO:0048008	platelet-derived growth factor receptor signaling pathway	17	0.0056	0.0091	-1.8709	212	immune	6	platelet derived growth
PLC BETA MEDIATED EVENTS%REACTOME%R-HSA-112043.1	PLC beta mediated events	52	0	0	-2.4089	2	muscle control	8	pka glucagon endothelin
POSITIVE REGULATION OF ACTIN NUCLEATION%GOBP%GO:0051127	positive regulation of actin nucleation	15	0.0054	0.0091	-1.8706	6	neural development	7	leishmania phagocytosis engulfment
POSITIVE REGULATION OF AXON EXTENSION%GOBP%GO:0045773	positive regulation of axon extension	24	0	0.001	-2.1388	37	neural development	7	positive extension dendrite
POSITIVE REGULATION OF AXONOGENESIS%GOBP%GO:0050772	positive regulation of axonogenesis	51	0	0.0003	-2.2647	37	neural development	7	positive extension dendrite
POSITIVE REGULATION OF CALCIUM ION TRANSMEMBRANE TRANSPORTER ACTIVITY%GOBP%GO:1901021	positive regulation of calcium ion transmembrane transporter activity	26	0	0.0007	-2.183	28	muscle control	8	cation activity transporter
POSITIVE REGULATION OF CELL MORPHOGENESIS INVOLVED IN DIFFERENTIATION%GOBP%GO:0010770	positive regulation of cell morphogenesis involved in differentiation	101	0	0.0007	-2.1807	37	neural development	7	positive extension dendrite
POSITIVE REGULATION OF DENDRITE DEVELOPMENT%GOBP%GO:1900006	positive regulation of dendrite development	43	0	0.0002	-2.3028	21	neural development	7	dendrite development synapse
POSITIVE REGULATION OF DENDRITE EXTENSION%GOBP%GO:1903861	positive regulation of dendrite extension	17	0.0019	0.0016	-2.0786	37	neural development	7	positive extension dendrite
POSITIVE REGULATION OF DENDRITE MORPHOGENESIS%GOBP%GO:0050775	positive regulation of dendrite morphogenesis	22	0.0018	0.0051	-1.9458	21	neural development	7	dendrite development synapse
POSITIVE REGULATION OF DEVELOPMENTAL GROWTH%GOBP%GO:0048639	positive regulation of developmental growth	81	0	0.0007	-2.1806	37	neural development	7	positive extension dendrite
POSITIVE REGULATION OF EXCITATORY POSTSYNAPTIC POTENTIAL%GOBP%GO:2000463	positive regulation of excitatory postsynaptic potential	18	0	0.0001	-2.3495	66	neural development	7	excitatory postsynaptic neurological
POSITIVE REGULATION OF EXOCYTOSIS%GOBP%GO:0045921	positive regulation of exocytosis	68	0	0.0075	-1.8944	50	neural development	7	exocytosis synaptic vesicle
POSITIVE REGULATION OF HISTONE H3-K4 METHYLATION%GOBP%GO:0051571	positive regulation of histone H3-K4 methylation	15	0	0.0093	-1.8676	207	transcription	5	positive regulation histone
POSITIVE REGULATION OF ION TRANSMEMBRANE TRANSPORTER ACTIVITY%GOBP%GO:0032414	positive regulation of ion transmembrane transporter activity	73	0	0.0052	-1.9425	28	muscle control	8	cation activity transporter
POSITIVE REGULATION OF NEUROLOGICAL SYSTEM PROCESS%GOBP%GO:0031646	positive regulation of neurological system process	34	0	0.0019	-2.0605	66	neural development	7	excitatory postsynaptic neurological
POSITIVE REGULATION OF NEURON PROJECTION DEVELOPMENT%GOBP%GO:0010976	positive regulation of neuron projection development	174	0	0	-2.7625	37	neural development	7	positive extension dendrite
POSITIVE REGULATION OF NOTCH SIGNALING PATHWAY%GOBP%GO:0045747	positive regulation of Notch signaling pathway	39	0.0017	0.0049	-1.9502	85	transcription	5	hlh transcription notch
POSITIVE REGULATION OF ORGANELLE ASSEMBLY%GOBP%GO:1902117	positive regulation of organelle assembly	60	0	0.0048	-1.9534	156	cell polarity and organization	14	regulation organelle assembly
POSITIVE REGULATION OF OSSIFICATION%GOBP%GO:0045778	positive regulation of ossification	62	0	0.0077	-1.8908	89	development	2	osteoblast differentiation ossification
POSITIVE REGULATION OF OSTEOBLAST DIFFERENTIATION%GOBP%GO:0045669	positive regulation of osteoblast differentiation	40	0.0017	0.0089	-1.8735	89	development	2	osteoblast differentiation ossification
POSITIVE REGULATION OF PEPTIDYL-SERINE PHOSPHORYLATION OF STAT PROTEIN%GOBP%GO:0033141	positive regulation of peptidyl-serine phosphorylation of STAT protein	19	0	0	3.0349	5	immune	6	type interferon proliferation
POSITIVE REGULATION OF SYNAPSE ASSEMBLY%GOBP%GO:0051965	positive regulation of synapse assembly	31	0	0.0001	-2.3493	21	neural development	7	dendrite development synapse
POSITIVE REGULATION OF TRANSCRIPTION OF NOTCH RECEPTOR TARGET%GOBP%GO:0007221	positive regulation of transcription of Notch receptor target	17	0.0019	0.0067	-1.9099	85	transcription	5	hlh transcription notch
POSITIVE REGULATION OF TRANSPORTER ACTIVITY%GOBP%GO:0032411	positive regulation of transporter activity	80	0	0.0086	-1.8786	28	muscle control	8	cation activity transporter
POST NMDA RECEPTOR ACTIVATION EVENTS%REACTOME%R-HSA-438064.3	Post NMDA receptor activation events	57	0	0.0003	-2.253	9	neural development	7	glutamate receptors nmda
POST-GOLGI VESICLE-MEDIATED TRANSPORT%GOBP%GO:0006892	post-Golgi vesicle-mediated transport	94	0	0.0015	-2.0907	17	neural development	7	protein localization periphery
POSTSYNAPSE ORGANIZATION%GOBP%GO:0099173	postsynapse organization	49	0	0.0002	-2.2842	19	neural development	7	dendritic spine presynapse
POSTTRANSCRIPTIONAL GENE SILENCING%GOBP%GO:0016441	posttranscriptional gene silencing	58	0.0017	0.0093	-1.8664	108	transcription	5	posttranscriptional silencing rna
POSTTRANSLATIONAL REGULATION OF ADHERENS JUNCTION STABILITY AND DISSASSEMBLY%PATHWAY INTERACTION DATABASE NCI-NATURE CURATED DATA%POSTTRANSLATIONAL REGULATION OF ADHERENS JUNCTION STABILITY AND DISSASSEMBLY	Posttranslational regulation of adherens junction stability and dissassembly	48	0.0018	0.0014	-2.0923	145	cell communication	20	posttranslational regulation adherens
PPARA ACTIVATES GENE EXPRESSION%REACTOME DATABASE ID RELEASE 72%1989781	PPARA activates gene expression	114	0	0.0053	-1.9401	76	circadian rhythm	21	rora activates pparalpha
PRE-NOTCH TRANSCRIPTION AND TRANSLATION%REACTOME DATABASE ID RELEASE 72%1912408	Pre-NOTCH Transcription and Translation	93	0.0018	0.0054	-1.9363	113	development	2	regulation runx1 expression
PRESYNAPSE ASSEMBLY%GOBP%GO:0099054	presynapse assembly	17	0	0.0048	-1.9548	19	neural development	7	dendritic spine presynapse
PRESYNAPSE ORGANIZATION%GOBP%GO:0099172	presynapse organization	18	0	0.0045	-1.9632	19	neural development	7	dendritic spine presynapse
PRESYNAPTIC ENDOCYTOSIS%GOBP%GO:0140238	presynaptic endocytosis	35	0	0.0003	-2.2761	49	neural development	7	vesicle recycling endocytosis
PRESYNAPTIC PHASE OF HOMOLOGOUS DNA PAIRING AND STRAND EXCHANGE%REACTOME%R-HSA-5693616.1	Presynaptic phase of homologous DNA pairing and strand exchange	39	0	0.0025	-2.0317	47	neural development	7	hdr strand exchange
PRIMARY NEURAL TUBE FORMATION%GOBP%GO:0014020	primary neural tube formation	37	0	0.0039	-1.978	204	neural development	7	primary neural tube
PROTEIN AUTOPHOSPHORYLATION%GOBP%GO:0046777	protein autophosphorylation	164	0	0	-2.5997	67	growth regulation	3	peptidyl tyrosine autophosphorylation
PROTEIN DEPHOSPHORYLATION%GOBP%GO:0006470	protein dephosphorylation	130	0	0.0001	-2.3355	138	growth regulation	3	protein dephosphorylation
PROTEIN LOCALIZATION TO CELL PERIPHERY%GOBP%GO:1990778	protein localization to cell periphery	183	0	0.0011	-2.1303	17	neural development	7	protein localization periphery
PROTEIN LOCALIZATION TO CELL SURFACE%GOBP%GO:0034394	protein localization to cell surface	26	0.0036	0.0088	-1.8746	183	cytoskeleton	4	protein localization cell
PROTEIN LOCALIZATION TO CENTROSOME%GOBP%GO:0071539	protein localization to centrosome	18	0	0.006	-1.9222	61	cytoskeleton	4	localization centrosome organizing
PROTEIN LOCALIZATION TO CYTOSKELETON%GOBP%GO:0044380	protein localization to cytoskeleton	36	0.0036	0.003	-2.0101	61	cytoskeleton	4	localization centrosome organizing
PROTEIN LOCALIZATION TO ENDOPLASMIC RETICULUM%GOBP%GO:0070972	protein localization to endoplasmic reticulum	130	0	0	2.587	1	protein translation	13	complex decay targeting
PROTEIN LOCALIZATION TO MICROTUBULE CYTOSKELETON%GOBP%GO:0072698	protein localization to microtubule cytoskeleton	32	0	0.0029	-2.014	61	cytoskeleton	4	localization centrosome organizing
PROTEIN LOCALIZATION TO MICROTUBULE ORGANIZING CENTER%GOBP%GO:1905508	protein localization to microtubule organizing center	19	0	0.004	-1.9749	61	cytoskeleton	4	localization centrosome organizing
PROTEIN LOCALIZATION TO PLASMA MEMBRANE%GOBP%GO:0072659	protein localization to plasma membrane	166	0	0.0007	-2.1772	17	neural development	7	protein localization periphery
PROTEIN LOCALIZATION TO SYNAPSE%GOBP%GO:0035418	protein localization to synapse	30	0	0.0008	-2.1584	17	neural development	7	protein localization periphery
PROTEIN SUMOYLATION%GOBP%GO:0016925	protein sumoylation	57	0	0.0055	-1.9337	4	transcription	5	mature sumoylation ubiquitinylation
PROTEIN TARGETING TO ER%GOBP%GO:0045047	protein targeting to ER	104	0	0	3.1603	1	protein translation	13	complex decay targeting
PROTEIN TARGETING TO MEMBRANE%GOBP%GO:0006612	protein targeting to membrane	157	0	0	2.5208	1	protein translation	13	complex decay targeting
PROTEIN TRANSPORT WITHIN LIPID BILAYER%GOBP%GO:0032594	protein transport within lipid bilayer	21	0	0.0002	-2.3036	17	neural development	7	protein localization periphery
PROTEIN TRANSPORT WITHIN PLASMA MEMBRANE%GOBP%GO:0099632	protein transport within plasma membrane	17	0	0.0004	-2.2191	17	neural development	7	protein localization periphery
PROTEIN-PROTEIN INTERACTIONS AT SYNAPSES%REACTOME DATABASE ID RELEASE 72%6794362	Protein-protein interactions at synapses	86	0	0	-2.9765	53	ECM	9	phosphatases neurexins neuroligins
PROTEOGLYCAN BIOSYNTHETIC PROCESS%GOBP%GO:0030166	proteoglycan biosynthetic process	55	0	0.0015	-2.0849	46	ECM	9	heparan sulfate proteoglycan
PROTEOGLYCAN METABOLIC PROCESS%GOBP%GO:0006029	proteoglycan metabolic process	71	0	0.0004	-2.2232	46	ECM	9	heparan sulfate proteoglycan
RAC PROTEIN SIGNAL TRANSDUCTION%GOBP%GO:0016601	Rac protein signal transduction	18	0.0018	0.0063	-1.917	169	growth regulation	3	rac protein signal
RAS PATHWAY%PANTHER PATHWAY%P04393	Ras Pathway	70	0	0.0011	-2.1295	34	growth regulation	3	egf pathway biopeptides
RECEPTOR CLUSTERING%GOBP%GO:0043113	receptor clustering	34	0	0.0061	-1.9208	17	neural development	7	protein localization periphery
RECEPTOR LOCALIZATION TO SYNAPSE%GOBP%GO:0097120	receptor localization to synapse	25	0	0.0007	-2.1764	17	neural development	7	protein localization periphery
RECEPTOR-TYPE TYROSINE-PROTEIN PHOSPHATASES%REACTOME%R-HSA-388844.2	Receptor-type tyrosine-protein phosphatases	19	0	0.0062	-1.9177	53	ECM	9	phosphatases neurexins neuroligins
RECYCLING OF BILE ACIDS AND SALTS%REACTOME DATABASE ID RELEASE 72%159418	Recycling of bile acids and salts	16	0	0.0023	-2.0421	117	immune	6	recycling bile metabolism
RECYCLING PATHWAY OF L1%REACTOME%R-HSA-437239.1	Recycling pathway of L1	27	0	0.0007	-2.1801	69	growth regulation	3	signal transduction l1
REELIN SIGNALING PATHWAY%PATHWAY INTERACTION DATABASE NCI-NATURE CURATED DATA%REELIN SIGNALING PATHWAY	Reelin signaling pathway	28	0	0.0001	-2.3249	139	growth regulation	3	reelin signaling pathway
REGULATION OF ACTIN DYNAMICS FOR PHAGOCYTIC CUP FORMATION%REACTOME%R-HSA-2029482.2	Regulation of actin dynamics for phagocytic cup formation	70	0	0.0006	-2.197	6	neural development	7	leishmania phagocytosis engulfment
REGULATION OF ACTIN FILAMENT BUNDLE ASSEMBLY%GOBP%GO:0032231	regulation of actin filament bundle assembly	79	0.0017	0.0055	-1.9355	54	cytoskeleton	4	stress fiber assembly
REGULATION OF ACTIN FILAMENT-BASED MOVEMENT%GOBP%GO:1903115	regulation of actin filament-based movement	36	0.0017	0.0079	-1.8873	56	muscle control	8	cardiac muscle cell
REGULATION OF ACTION POTENTIAL%GOBP%GO:0098900	regulation of action potential	44	0	0.0007	-2.1839	56	muscle control	8	cardiac muscle cell
REGULATION OF ACTOMYOSIN STRUCTURE ORGANIZATION%GOBP%GO:0110020	regulation of actomyosin structure organization	77	0	0.0023	-2.0395	54	cytoskeleton	4	stress fiber assembly
REGULATION OF ADHERENS JUNCTION ORGANIZATION%GOBP%GO:1903391	regulation of adherens junction organization	59	0	0	-2.4353	32	ECM	9	matrix junction focal
REGULATION OF AXON EXTENSION INVOLVED IN AXON GUIDANCE%GOBP%GO:0048841	regulation of axon extension involved in axon guidance	22	0	0.0004	-2.2415	11	neural development	7	axon guidance negative
REGULATION OF AXON EXTENSION%GOBP%GO:0030516	regulation of axon extension	57	0	0	-2.429	11	neural development	7	axon guidance negative
REGULATION OF AXON GUIDANCE%GOBP%GO:1902667	regulation of axon guidance	32	0	0.0001	-2.3845	11	neural development	7	axon guidance negative
REGULATION OF AXONOGENESIS%GOBP%GO:0050770	regulation of axonogenesis	113	0	0	-2.6704	11	neural development	7	axon guidance negative
REGULATION OF CARDIAC MUSCLE CELL ACTION POTENTIAL%GOBP%GO:0098901	regulation of cardiac muscle cell action potential	28	0	0.0039	-1.9784	56	muscle control	8	cardiac muscle cell
REGULATION OF CARDIAC MUSCLE CELL CONTRACTION%GOBP%GO:0086004	regulation of cardiac muscle cell contraction	32	0	0.0026	-2.0247	56	muscle control	8	cardiac muscle cell
REGULATION OF CARDIAC MUSCLE CONTRACTION%GOBP%GO:0055117	regulation of cardiac muscle contraction	60	0.0018	0.0093	-1.8667	56	muscle control	8	cardiac muscle cell
REGULATION OF CATION CHANNEL ACTIVITY%GOBP%GO:2001257	regulation of cation channel activity	141	0	0.002	-2.0559	28	muscle control	8	cation activity transporter
REGULATION OF CDC42 ACTIVITY%PATHWAY INTERACTION DATABASE NCI-NATURE CURATED DATA%REGULATION OF CDC42 ACTIVITY	Regulation of CDC42 activity	30	0	0.0004	-2.2289	154	transcription	5	regulation cdc42 reg
REGULATION OF CELL JUNCTION ASSEMBLY%GOBP%GO:1901888	regulation of cell junction assembly	80	0	0.001	-2.1352	32	ECM	9	matrix junction focal
REGULATION OF CELL PROJECTION ASSEMBLY%GOBP%GO:0060491	regulation of cell projection assembly	171	0	0.0008	-2.1649	72	neural development	7	bounded projection filopodium
REGULATION OF CELL SHAPE%GOBP%GO:0008360	regulation of cell shape	113	0	0.0008	-2.1608	227	cell polarity and organization	14	regulation cell shape
REGULATION OF CELL SIZE%GOBP%GO:0008361	regulation of cell size	110	0	0	-2.533	11	neural development	7	axon guidance negative
REGULATION OF CELL-MATRIX ADHESION%GOBP%GO:0001952	regulation of cell-matrix adhesion	94	0	0.0001	-2.3624	32	ECM	9	matrix junction focal
REGULATION OF CELL-SUBSTRATE ADHESION%GOBP%GO:0010810	regulation of cell-substrate adhesion	152	0	0.0016	-2.0785	32	ECM	9	matrix junction focal
REGULATION OF CELL-SUBSTRATE JUNCTION ASSEMBLY%GOBP%GO:0090109	regulation of cell-substrate junction assembly	52	0	0.0001	-2.3179	32	ECM	9	matrix junction focal
REGULATION OF CHOLESTEROL STORAGE%GOBP%GO:0010885	regulation of cholesterol storage	15	0.0019	0.0082	-1.8843	173	immune	6	regulation cholesterol storage
REGULATION OF CILIUM ASSEMBLY%GOBP%GO:1902017	regulation of cilium assembly	68	0	0.0008	-2.1573	72	neural development	7	bounded projection filopodium
REGULATION OF CIRCADIAN RHYTHM%GOBP%GO:0042752	regulation of circadian rhythm	94	0	0.0047	-1.9573	172	circadian rhythm	21	regulation circadian rhythm
REGULATION OF COENZYME METABOLIC PROCESS%GOBP%GO:0051196	regulation of coenzyme metabolic process	82	0	0.005	-1.9466	4	transcription	5	mature sumoylation ubiquitinylation
REGULATION OF DENDRITE DEVELOPMENT%GOBP%GO:0050773	regulation of dendrite development	91	0	0	-2.788	21	neural development	7	dendrite development synapse
REGULATION OF DENDRITE EXTENSION%GOBP%GO:1903859	regulation of dendrite extension	18	0.0019	0.0039	-1.9767	37	neural development	7	positive extension dendrite
REGULATION OF DENDRITE MORPHOGENESIS%GOBP%GO:0048814	regulation of dendrite morphogenesis	58	0	0	-2.5531	21	neural development	7	dendrite development synapse
REGULATION OF DENDRITIC SPINE DEVELOPMENT%GOBP%GO:0060998	regulation of dendritic spine development	45	0	0.0007	-2.1836	21	neural development	7	dendrite development synapse
REGULATION OF DENDRITIC SPINE MORPHOGENESIS%GOBP%GO:0061001	regulation of dendritic spine morphogenesis	29	0.0018	0.0033	-1.9967	21	neural development	7	dendrite development synapse
REGULATION OF DEPHOSPHORYLATION%GOBP%GO:0035303	regulation of dephosphorylation	141	0	0.0099	-1.8569	208	growth regulation	3	regulation dephosphorylation
REGULATION OF DEVELOPMENTAL GROWTH%GOBP%GO:0048638	regulation of developmental growth	153	0	0.0002	-2.2948	11	neural development	7	axon guidance negative
REGULATION OF EPIDERMAL GROWTH FACTOR RECEPTOR SIGNALING PATHWAY%GOBP%GO:0042058	regulation of epidermal growth factor receptor signaling pathway	80	0	0.0026	-2.0233	70	growth regulation	3	epidermal growth erbb
REGULATION OF EPITHELIAL CELL MIGRATION%GOBP%GO:0010632	regulation of epithelial cell migration	200	0	0.0069	-1.906	141	development	2	regulation epithelial cell
REGULATION OF ERBB SIGNALING PATHWAY%GOBP%GO:1901184	regulation of ERBB signaling pathway	86	0	0.0023	-2.04	70	growth regulation	3	epidermal growth erbb
REGULATION OF ESTABLISHMENT OF CELL POLARITY%GOBP%GO:2000114	regulation of establishment of cell polarity	18	0	0.0015	-2.0883	137	cell polarity and organization	14	establishment maintenance polarity
REGULATION OF ESTABLISHMENT OR MAINTENANCE OF CELL POLARITY%GOBP%GO:0032878	regulation of establishment or maintenance of cell polarity	21	0	0.0012	-2.1129	137	cell polarity and organization	14	establishment maintenance polarity
REGULATION OF EXECUTION PHASE OF APOPTOSIS%GOBP%GO:1900117	regulation of execution phase of apoptosis	31	0	0.0017	2.1443	128	cell death	12	execution phase apoptosis
REGULATION OF EXOCYTOSIS%GOBP%GO:0017157	regulation of exocytosis	146	0	0.0053	-1.9381	50	neural development	7	exocytosis synaptic vesicle
REGULATION OF EXPRESSION OF SLITS AND ROBOS%REACTOME%R-HSA-9010553.1	Regulation of expression of SLITs and ROBOs	171	0	0	2.6376	1	protein translation	13	complex decay targeting
REGULATION OF EXTENT OF CELL GROWTH%GOBP%GO:0061387	regulation of extent of cell growth	61	0	0	-2.47	11	neural development	7	axon guidance negative
REGULATION OF FILOPODIUM ASSEMBLY%GOBP%GO:0051489	regulation of filopodium assembly	39	0	0.0012	-2.1056	72	neural development	7	bounded projection filopodium
REGULATION OF FOCAL ADHESION ASSEMBLY%GOBP%GO:0051893	regulation of focal adhesion assembly	52	0	0.0001	-2.3662	32	ECM	9	matrix junction focal
REGULATION OF GLUCOKINASE BY GLUCOKINASE REGULATORY PROTEIN%REACTOME DATABASE ID RELEASE 72%170822	Regulation of Glucokinase by Glucokinase Regulatory Protein	28	0	0.0012	-2.1105	4	transcription	5	mature sumoylation ubiquitinylation
REGULATION OF GLUTAMATE RECEPTOR SIGNALING PATHWAY%GOBP%GO:1900449	regulation of glutamate receptor signaling pathway	55	0	0.0005	-2.2121	28	muscle control	8	cation activity transporter
REGULATION OF GLYCOLYTIC PROCESS%GOBP%GO:0006110	regulation of glycolytic process	69	0	0.0076	-1.8923	4	transcription	5	mature sumoylation ubiquitinylation
REGULATION OF GOLGI ORGANIZATION%GOBP%GO:1903358	regulation of Golgi organization	16	0	0.0008	-2.1644	190	cytoskeleton	4	regulation golgi organization
REGULATION OF HIPPO SIGNALING%GOBP%GO:0035330	regulation of hippo signaling	16	0.0036	0.0068	-1.9068	211	growth regulation	3	regulation hippo signaling
REGULATION OF IFNA SIGNALING%REACTOME DATABASE ID RELEASE 72%912694	Regulation of IFNA signaling	24	0	0	2.8625	5	immune	6	type interferon proliferation
REGULATION OF INSULIN SECRETION%REACTOME%R-HSA-422356.3	Regulation of insulin secretion	78	0	0.0026	-2.0271	2	muscle control	8	pka glucagon endothelin
REGULATION OF JAK-STAT CASCADE%GOBP%GO:0046425	regulation of JAK-STAT cascade	113	0	0.0061	2.0132	5	immune	6	type interferon proliferation
REGULATION OF LIPID METABOLISM BY PPARALPHA%REACTOME DATABASE ID RELEASE 72%400206	Regulation of lipid metabolism by PPARalpha	115	0	0.0039	-1.9794	76	circadian rhythm	21	rora activates pparalpha
REGULATION OF MECP2 EXPRESSION AND ACTIVITY%REACTOME%R-HSA-9022692.1	Regulation of MECP2 expression and activity	29	0	0.0022	-2.0436	80	neural development	7	mecp2 neuronal channels
REGULATION OF MEMBRANE LIPID DISTRIBUTION%GOBP%GO:0097035	regulation of membrane lipid distribution	48	0	0.0001	-2.3525	73	cytoskeleton	4	translocation distribution atpases
REGULATION OF MICROTUBULE CYTOSKELETON ORGANIZATION%GOBP%GO:0070507	regulation of microtubule cytoskeleton organization	159	0	0.0061	-1.9214	25	cytoskeleton	4	polymerization depolymerization microtubule
REGULATION OF MICROTUBULE POLYMERIZATION OR DEPOLYMERIZATION%GOBP%GO:0031110	regulation of microtubule polymerization or depolymerization	71	0	0.0048	-1.9556	25	cytoskeleton	4	polymerization depolymerization microtubule
REGULATION OF MICROTUBULE POLYMERIZATION%GOBP%GO:0031113	regulation of microtubule polymerization	43	0	0.0035	-1.9904	25	cytoskeleton	4	polymerization depolymerization microtubule
REGULATION OF MICROTUBULE-BASED PROCESS%GOBP%GO:0032886	regulation of microtubule-based process	187	0	0.0042	-1.97	25	cytoskeleton	4	polymerization depolymerization microtubule
REGULATION OF MUSCLE ADAPTATION%GOBP%GO:0043502	regulation of muscle adaptation	43	0.0017	0.0096	-1.8628	214	muscle control	8	regulation muscle adaptation
REGULATION OF NEUROLOGICAL SYSTEM PROCESS%GOBP%GO:0031644	regulation of neurological system process	74	0	0.0038	-1.9811	66	neural development	7	excitatory postsynaptic neurological
REGULATION OF NEURON MIGRATION%GOBP%GO:2001222	regulation of neuron migration	27	0	0.0017	-2.072	203	neural development	7	regulation neuron migration
REGULATION OF NEUROTRANSMITTER RECEPTOR ACTIVITY%GOBP%GO:0099601	regulation of neurotransmitter receptor activity	57	0	0.0007	-2.1802	28	muscle control	8	cation activity transporter
REGULATION OF NMDA RECEPTOR ACTIVITY%GOBP%GO:2000310	regulation of NMDA receptor activity	29	0	0.0001	-2.406	28	muscle control	8	cation activity transporter
REGULATION OF NON-CANONICAL WNT SIGNALING PATHWAY%GOBP%GO:2000050	regulation of non-canonical Wnt signaling pathway	18	0.0018	0.005	-1.9471	220	growth regulation	3	regulation canonical wnt
REGULATION OF NUCLEOTIDE CATABOLIC PROCESS%GOBP%GO:0030811	regulation of nucleotide catabolic process	69	0	0.0098	-1.8589	4	transcription	5	mature sumoylation ubiquitinylation
REGULATION OF ORGANELLE ASSEMBLY%GOBP%GO:1902115	regulation of organelle assembly	177	0	0.0007	-2.179	156	cell polarity and organization	14	regulation organelle assembly
REGULATION OF OSTEOBLAST DIFFERENTIATION%GOBP%GO:0045667	regulation of osteoblast differentiation	75	0	0.0062	-1.9175	89	development	2	osteoblast differentiation ossification
REGULATION OF P38-ALPHA AND P38-BETA%PATHWAY INTERACTION DATABASE NCI-NATURE CURATED DATA%REGULATION OF P38-ALPHA AND P38-BETA	Regulation of p38-alpha and p38-beta	30	0.0018	0.0089	-1.8747	110	cell death	12	regulation p38 pathway
REGULATION OF PEPTIDYL-SERINE PHOSPHORYLATION OF STAT PROTEIN%GOBP%GO:0033139	regulation of peptidyl-serine phosphorylation of STAT protein	20	0	0	2.9452	5	immune	6	type interferon proliferation
REGULATION OF PLASMA MEMBRANE BOUNDED CELL PROJECTION ASSEMBLY%GOBP%GO:0120032	regulation of plasma membrane bounded cell projection assembly	170	0	0.0008	-2.1669	72	neural development	7	bounded projection filopodium
REGULATION OF POSTSYNAPSE ORGANIZATION%GOBP%GO:0099175	regulation of postsynapse organization	52	0	0.0059	-1.9244	21	neural development	7	dendrite development synapse
REGULATION OF POSTSYNAPTIC MEMBRANE NEUROTRANSMITTER RECEPTOR LEVELS%GOBP%GO:0099072	regulation of postsynaptic membrane neurotransmitter receptor levels	24	0	0.0003	-2.2699	17	neural development	7	protein localization periphery
REGULATION OF POTASSIUM ION TRANSMEMBRANE TRANSPORT%GOBP%GO:1901379	regulation of potassium ion transmembrane transport	65	0	0.0033	-1.9998	28	muscle control	8	cation activity transporter
REGULATION OF PROTEIN DEPOLYMERIZATION%GOBP%GO:1901879	regulation of protein depolymerization	58	0	0.0054	-1.9373	25	cytoskeleton	4	polymerization depolymerization microtubule
REGULATION OF RAC1 ACTIVITY%PATHWAY INTERACTION DATABASE NCI-NATURE CURATED DATA%REGULATION OF RAC1 ACTIVITY	Regulation of RAC1 activity	38	0	0	-2.8056	111	transcription	5	regulation rac1 pathway
REGULATION OF RAS FAMILY ACTIVATION%PATHWAY INTERACTION DATABASE NCI-NATURE CURATED DATA%REGULATION OF RAS FAMILY ACTIVATION	Regulation of Ras family activation	33	0	0.0025	-2.0309	93	growth regulation	3	regulation ras family
REGULATION OF RAS PROTEIN SIGNAL TRANSDUCTION%GOBP%GO:0046578	regulation of Ras protein signal transduction	134	0	0.0012	-2.1053	71	growth regulation	3	gtpase signal transduction
REGULATION OF RELEASE OF SEQUESTERED CALCIUM ION INTO CYTOSOL BY SARCOPLASMIC RETICULUM%GOBP%GO:0010880	regulation of release of sequestered calcium ion into cytosol by sarcoplasmic reticulum	20	0	0	-2.4776	162	muscle control	8	regulation release sequestered
REGULATION OF RHOA ACTIVITY%PATHWAY INTERACTION DATABASE NCI-NATURE CURATED DATA%REGULATION OF RHOA ACTIVITY	Regulation of RhoA activity	46	0	0	-2.4173	23	cell death	12	signals death jnk
REGULATION OF RUNX1 EXPRESSION AND ACTIVITY%REACTOME%R-HSA-8934593.1	Regulation of RUNX1 Expression and Activity	17	0	0.0029	-2.0123	113	development	2	regulation runx1 expression
REGULATION OF SEQUESTERING OF CALCIUM ION%GOBP%GO:0051282	regulation of sequestering of calcium ion	98	0	0.0099	-1.8577	8	muscle control	8	calcium inositol phosphate
REGULATION OF SIGNALING BY CBL%REACTOME DATABASE ID RELEASE 72%912631	Regulation of signaling by CBL	17	0	0.0007	-2.1839	83	immune	6	interleukin 5 gm
REGULATION OF SIGNALING RECEPTOR ACTIVITY%GOBP%GO:0010469	regulation of signaling receptor activity	114	0	0.0013	-2.1005	28	muscle control	8	cation activity transporter
REGULATION OF SMOOTHENED SIGNALING PATHWAY%GOBP%GO:0008589	regulation of smoothened signaling pathway	56	0	0.0079	-1.8878	149	growth regulation	3	regulation smoothened pathway
REGULATION OF SODIUM ION TRANSMEMBRANE TRANSPORT%GOBP%GO:1902305	regulation of sodium ion transmembrane transport	53	0	0.0025	-2.029	78	muscle control	8	sodium ion transporter
REGULATION OF SODIUM ION TRANSMEMBRANE TRANSPORTER ACTIVITY%GOBP%GO:2000649	regulation of sodium ion transmembrane transporter activity	44	0	0.0058	-1.927	78	muscle control	8	sodium ion transporter
REGULATION OF SODIUM ION TRANSPORT%GOBP%GO:0002028	regulation of sodium ion transport	69	0	0.0028	-2.0157	78	muscle control	8	sodium ion transporter
REGULATION OF STRESS FIBER ASSEMBLY%GOBP%GO:0051492	regulation of stress fiber assembly	70	0.0017	0.002	-2.0581	54	cytoskeleton	4	stress fiber assembly
REGULATION OF SYNAPSE ASSEMBLY%GOBP%GO:0051963	regulation of synapse assembly	56	0	0.0001	-2.3772	21	neural development	7	dendrite development synapse
REGULATION OF SYNAPSE ORGANIZATION%GOBP%GO:0050807	regulation of synapse organization	122	0	0.0002	-2.2852	21	neural development	7	dendrite development synapse
REGULATION OF SYNAPSE STRUCTURE OR ACTIVITY%GOBP%GO:0050803	regulation of synapse structure or activity	132	0	0.0003	-2.2523	21	neural development	7	dendrite development synapse
REGULATION OF SYNAPTIC TRANSMISSION, GLUTAMATERGIC%GOBP%GO:0051966	regulation of synaptic transmission, glutamatergic	47	0	0.0029	-2.0116	74	neural development	7	coupled glutamate glutamatergic
REGULATION OF SYNAPTIC VESICLE CYCLE%GOBP%GO:0098693	regulation of synaptic vesicle cycle	36	0.0017	0.0096	-1.8627	50	neural development	7	exocytosis synaptic vesicle
REGULATION OF SYNAPTIC VESICLE EXOCYTOSIS%GOBP%GO:2000300	regulation of synaptic vesicle exocytosis	25	0.0039	0.008	-1.8863	50	neural development	7	exocytosis synaptic vesicle
REGULATION OF SYNAPTIC VESICLE TRANSPORT%GOBP%GO:1902803	regulation of synaptic vesicle transport	29	0	0.0033	-1.9973	50	neural development	7	exocytosis synaptic vesicle
RESOLUTION OF D-LOOP STRUCTURES THROUGH SYNTHESIS-DEPENDENT STRAND ANNEALING (SDSA)%REACTOME%R-HSA-5693554.1	Resolution of D-loop Structures through Synthesis-Dependent Strand Annealing (SDSA)	26	0.0018	0.0089	-1.8726	47	neural development	7	hdr strand exchange
RESPIRATORY ELECTRON TRANSPORT CHAIN%GOBP%GO:0022904	respiratory electron transport chain	93	0	0.0016	2.1508	13	mitochondrion	10	atp electron respiratory
RESPIRATORY ELECTRON TRANSPORT, ATP SYNTHESIS BY CHEMIOSMOTIC COUPLING, AND HEAT PRODUCTION BY UNCOUPLING PROTEINS.%REACTOME DATABASE ID RELEASE 72%163200	Respiratory electron transport, ATP synthesis by chemiosmotic coupling, and heat production by uncoupling proteins.	124	0	0.0004	2.2754	13	mitochondrion	10	atp electron respiratory
RESPIRATORY ELECTRON TRANSPORT%REACTOME%R-HSA-611105.3	Respiratory electron transport	100	0	0.0012	2.1794	13	mitochondrion	10	atp electron respiratory
RESPONSE OF EIF2AK4 (GCN2) TO AMINO ACID DEFICIENCY%REACTOME%R-HSA-9633012.2	Response of EIF2AK4 (GCN2) to amino acid deficiency	102	0	0	3.2457	1	protein translation	13	complex decay targeting
RESPONSE TO ALCOHOL%GOBP%GO:0097305	response to alcohol	82	0	0.0044	-1.9653	115	environment sensing	11	cellular response alcohol
RESPONSE TO AMMONIUM ION%GOBP%GO:0060359	response to ammonium ion	53	0.0034	0.0098	-1.8593	146	environment sensing	11	cellular ammonium ion
RESPONSE TO AMYLOID-BETA%GOBP%GO:1904645	response to amyloid-beta	44	0.0017	0.0075	-1.8954	126	neural development	7	cellular amyloid beta
RESPONSE TO CADMIUM ION%GOBP%GO:0046686	response to cadmium ion	29	0	0.0002	2.3224	26	environment sensing	11	zinc copper cadmium
RESPONSE TO CALCIUM ION%GOBP%GO:0051592	response to calcium ion	102	0	0.0002	-2.2753	97	muscle control	8	cellular calcium ion
RESPONSE TO CHEMOKINE%GOBP%GO:1990868	response to chemokine	65	0	0	2.5261	10	immune	6	chemokine monocyte chemotaxis
RESPONSE TO COPPER ION%GOBP%GO:0046688	response to copper ion	25	0	0.0015	2.1543	26	environment sensing	11	zinc copper cadmium
RESPONSE TO DSRNA%GOBP%GO:0043331	response to dsRNA	40	0	0	2.63	5	immune	6	type interferon proliferation
RESPONSE TO EXOGENOUS DSRNA%GOBP%GO:0043330	response to exogenous dsRNA	36	0	0	2.7612	5	immune	6	type interferon proliferation
RESPONSE TO FUNGUS%GOBP%GO:0009620	response to fungus	23	0	0.0008	2.2151	20	immune	6	humoral response defense
RESPONSE TO GLUCAGON%GOBP%GO:0033762	response to glucagon	20	0	0.0083	-1.8815	2	muscle control	8	pka glucagon endothelin
RESPONSE TO NERVE GROWTH FACTOR%GOBP%GO:1990089	response to nerve growth factor	22	0.0018	0.0033	-1.9996	133	neural development	7	nerve factor stimulus
RESPONSE TO TYPE I INTERFERON%GOBP%GO:0034340	response to type I interferon	68	0	0.0004	2.2786	5	immune	6	type interferon proliferation
RESPONSE TO ZINC ION%GOBP%GO:0010043	response to zinc ion	29	0	0.002	2.1309	26	environment sensing	11	zinc copper cadmium
RETINOIC ACID RECEPTORS-MEDIATED SIGNALING%PATHWAY INTERACTION DATABASE NCI-NATURE CURATED DATA%RETINOIC ACID RECEPTORS-MEDIATED SIGNALING	Retinoic acid receptors-mediated signaling	30	0	0.0001	-2.3357	125	growth regulation	3	retinoic acid mediated
RHO GTPASE CYCLE%REACTOME DATABASE ID RELEASE 72%194840	Rho GTPase cycle	139	0	0	-2.8746	23	cell death	12	signals death jnk
RHO GTPASES ACTIVATE PAKS%REACTOME DATABASE ID RELEASE 72%5627123	RHO GTPases activate PAKs	20	0	0.0062	-1.9183	48	growth regulation	3	paks semaphorin interactions
RHO GTPASES ACTIVATE WASPS AND WAVES%REACTOME DATABASE ID RELEASE 72%5663213	RHO GTPases Activate WASPs and WAVEs	35	0	0.0048	-1.9553	6	neural development	7	leishmania phagocytosis engulfment
RIBOSOMAL SCANNING AND START CODON RECOGNITION%REACTOME DATABASE ID RELEASE 72%72702	Ribosomal scanning and start codon recognition	59	0	0	2.48	1	protein translation	13	complex decay targeting
RIBOSOME ASSEMBLY%GOBP%GO:0042255	ribosome assembly	57	0	0.0007	2.2325	210	protein translation	13	ribosome assembly
ROLE OF CALCINEURIN-DEPENDENT NFAT SIGNALING IN LYMPHOCYTES%PATHWAY INTERACTION DATABASE NCI-NATURE CURATED DATA%ROLE OF CALCINEURIN-DEPENDENT NFAT SIGNALING IN LYMPHOCYTES	Role of Calcineurin-dependent NFAT signaling in lymphocytes	53	0.0018	0.0098	-1.8587	148	muscle control	8	dependent nfat lymphocytes
RORA ACTIVATES GENE EXPRESSION%REACTOME DATABASE ID RELEASE 72%1368082	RORA activates gene expression	18	0	0.0007	-2.1759	76	circadian rhythm	21	rora activates pparalpha
RRNA PROCESSING IN THE NUCLEUS AND CYTOSOL%REACTOME DATABASE ID RELEASE 72%8868773	rRNA processing in the nucleus and cytosol	193	0	0	2.7168	1	protein translation	13	complex decay targeting
RRNA PROCESSING%REACTOME%R-HSA-72312.3	rRNA processing	203	0	0	2.7516	1	protein translation	13	complex decay targeting
RXR AND RAR HETERODIMERIZATION WITH OTHER NUCLEAR RECEPTOR%PATHWAY INTERACTION DATABASE NCI-NATURE CURATED DATA%RXR AND RAR HETERODIMERIZATION WITH OTHER NUCLEAR RECEPTOR	RXR and RAR heterodimerization with other nuclear receptor	26	0.0037	0.0088	-1.8755	64	transcription	5	rxr rar heterodimerization
SELENOAMINO ACID METABOLISM%REACTOME DATABASE ID RELEASE 72%2408522	Selenoamino acid metabolism	116	0	0	2.9719	1	protein translation	13	complex decay targeting
SELENOCYSTEINE SYNTHESIS%REACTOME%R-HSA-2408557.2	Selenocysteine synthesis	93	0	0	3.2329	1	protein translation	13	complex decay targeting
SEMAPHORIN INTERACTIONS%REACTOME DATABASE ID RELEASE 72%373755	Semaphorin interactions	64	0	0.0003	-2.2803	48	growth regulation	3	paks semaphorin interactions
SEMAPHORIN-PLEXIN SIGNALING PATHWAY%GOBP%GO:0071526	semaphorin-plexin signaling pathway	36	0	0.0001	-2.3882	11	neural development	7	axon guidance negative
SENSORY PERCEPTION OF BITTER TASTE%GOBP%GO:0050913	sensory perception of bitter taste	39	0	0	3.1413	22	environment sensing	11	chemical sensory perception
SENSORY PERCEPTION OF CHEMICAL STIMULUS%GOBP%GO:0007606	sensory perception of chemical stimulus	175	0	0	3.5812	22	environment sensing	11	chemical sensory perception
SENSORY PERCEPTION OF MECHANICAL STIMULUS%GOBP%GO:0050954	sensory perception of mechanical stimulus	97	0	0.0014	-2.0936	116	environment sensing	11	perception sound mechanical
SENSORY PERCEPTION OF SMELL%GOBP%GO:0007608	sensory perception of smell	119	0	0	3.4165	22	environment sensing	11	chemical sensory perception
SENSORY PERCEPTION OF SOUND%GOBP%GO:0007605	sensory perception of sound	91	0	0.0012	-2.1091	116	environment sensing	11	perception sound mechanical
SENSORY PERCEPTION OF TASTE%GOBP%GO:0050909	sensory perception of taste	49	0	0	2.9899	22	environment sensing	11	chemical sensory perception
SHC1 EVENTS IN ERBB2 SIGNALING%REACTOME%R-HSA-1250196.4	SHC1 events in ERBB2 signaling	18	0.0037	0.0038	-1.9801	24	growth regulation	3	pi3k cancer erbb4
SHP2 SIGNALING%PATHWAY INTERACTION DATABASE NCI-NATURE CURATED DATA%SHP2 SIGNALING	SHP2 signaling	57	0	0.0049	-1.9518	109	growth regulation	3	shp2 signaling pathway
SIG_BCR_SIGNALING_PATHWAY%MSIGDB_C2%SIG_BCR_SIGNALING_PATHWAY	SIG_BCR_SIGNALING_PATHWAY	46	0	0.0001	-2.3654	118	immune	6	sig pip3 lymphocytes
SIG_CHEMOTAXIS%MSIGDB_C2%SIG_CHEMOTAXIS	SIG_CHEMOTAXIS	45	0	0.0012	-2.1099	192	immune	6	sig chemotaxis
SIG_PIP3_SIGNALING_IN_B_LYMPHOCYTES%MSIGDB_C2%SIG_PIP3_SIGNALING_IN_B_LYMPHOCYTES	SIG_PIP3_SIGNALING_IN_B_LYMPHOCYTES	36	0.0018	0.0011	-2.1287	118	immune	6	sig pip3 lymphocytes
SIGNAL TRANSDUCTION BY L1%REACTOME%R-HSA-445144.1	Signal transduction by L1	20	0.0055	0.0079	-1.8883	69	growth regulation	3	signal transduction l1
SIGNALING BY BRAF AND RAF FUSIONS%REACTOME%R-HSA-6802952.1	Signaling by BRAF and RAF fusions	61	0	0.0003	-2.2648	122	growth regulation	3	oncogenic braf raf
SIGNALING BY CYTOSOLIC FGFR1 FUSION MUTANTS%REACTOME DATABASE ID RELEASE 72%1839117	Signaling by cytosolic FGFR1 fusion mutants	16	0	0.0001	-2.4032	79	growth regulation	3	cytosolic fgfr1 activation
SIGNALING BY ERBB4%REACTOME%R-HSA-1236394.4	Signaling by ERBB4	54	0.0034	0.0096	-1.8626	24	growth regulation	3	pi3k cancer erbb4
SIGNALING BY FGFR1 IN DISEASE%REACTOME%R-HSA-5655302.2	Signaling by FGFR1 in disease	32	0	0.0033	-1.9995	79	growth regulation	3	cytosolic fgfr1 activation
SIGNALING BY HIPPO%REACTOME%R-HSA-2028269.1	Signaling by Hippo	19	0	0.0011	-2.1303	143	growth regulation	3	signaling hippo
SIGNALING BY MET%REACTOME DATABASE ID RELEASE 72%6806834	Signaling by MET	64	0	0.0003	-2.2537	14	ECM	9	beta1 ecm proteoglycans
SIGNALING BY PDGF%REACTOME%R-HSA-186797.4	Signaling by PDGF	49	0	0.0009	-2.1455	98	growth regulation	3	pdgfr disease pdgf
SIGNALING BY PDGFR IN DISEASE%REACTOME DATABASE ID RELEASE 72%9671555	Signaling by PDGFR in disease	17	0.0018	0.009	-1.8705	98	growth regulation	3	pdgfr disease pdgf
SIGNALING BY SCF-KIT%REACTOME%R-HSA-1433557.3	Signaling by SCF-KIT	38	0	0.0043	-1.968	3	immune	6	scf kit epo
SIGNALING BY VEGF%REACTOME%R-HSA-194138.2	Signaling by VEGF	101	0	0.0003	-2.2591	31	growth regulation	3	vegfa vegfr2 vegfr1
SIGNALING EVENTS MEDIATED BY FOCAL ADHESION KINASE%PATHWAY INTERACTION DATABASE NCI-NATURE CURATED DATA%SIGNALING EVENTS MEDIATED BY FOCAL ADHESION KINASE	Signaling events mediated by focal adhesion kinase	58	0	0	-2.6302	27	growth regulation	3	erbb1 proximal downstream
SIGNALING EVENTS MEDIATED BY HEPATOCYTE GROWTH FACTOR RECEPTOR (C-MET)%PATHWAY INTERACTION DATABASE NCI-NATURE CURATED DATA%SIGNALING EVENTS MEDIATED BY HEPATOCYTE GROWTH FACTOR RECEPTOR (C-MET)	Signaling events mediated by Hepatocyte Growth Factor Receptor (c-Met)	79	0	0.0001	-2.3747	12	ECM	9	hepatocyte vegfr3 angiogenesis
SIGNALING EVENTS MEDIATED BY STEM CELL FACTOR RECEPTOR (C-KIT)%PATHWAY INTERACTION DATABASE NCI-NATURE CURATED DATA%SIGNALING EVENTS MEDIATED BY STEM CELL FACTOR RECEPTOR (C-KIT)	Signaling events mediated by Stem cell factor receptor (c-Kit)	51	0	0.0007	-2.1809	3	immune	6	scf kit epo
SIGNALING EVENTS MEDIATED BY TCPTP%PATHWAY INTERACTION DATABASE NCI-NATURE CURATED DATA%SIGNALING EVENTS MEDIATED BY TCPTP	Signaling events mediated by TCPTP	39	0	0.0005	-2.206	100	growth regulation	3	signaling tcptp pathway
SIGNALING EVENTS MEDIATED BY VEGFR1 AND VEGFR2%PATHWAY INTERACTION DATABASE NCI-NATURE CURATED DATA%SIGNALING EVENTS MEDIATED BY VEGFR1 AND VEGFR2	Signaling events mediated by VEGFR1 and VEGFR2	68	0	0.0001	-2.3902	31	growth regulation	3	vegfa vegfr2 vegfr1
SIGNALING EVENTS REGULATED BY RET TYROSINE KINASE%PATHWAY INTERACTION DATABASE NCI-NATURE CURATED DATA%SIGNALING EVENTS REGULATED BY RET TYROSINE KINASE	Signaling events regulated by Ret tyrosine kinase	38	0	0.0057	-1.9297	35	neural development	7	motor guidance slit
SLC TRANSPORTER DISORDERS%REACTOME%R-HSA-5619102.5	SLC transporter disorders	95	0	0.0095	-1.8647	4	transcription	5	mature sumoylation ubiquitinylation
SOCIAL BEHAVIOR%GOBP%GO:0035176	social behavior	28	0	0.0057	-1.9308	60	neural development	7	learning social behavior
SODIUM ION IMPORT ACROSS PLASMA MEMBRANE%GOBP%GO:0098719	sodium ion import across plasma membrane	18	0.0018	0.0068	-1.9074	57	muscle control	8	sodium acids oligopeptides
SODIUM ION TRANSMEMBRANE TRANSPORT%GOBP%GO:0035725	sodium ion transmembrane transport	64	0	0.0003	-2.2757	57	muscle control	8	sodium acids oligopeptides
SODIUM ION TRANSPORT%GOBP%GO:0006814	sodium ion transport	87	0	0.0011	-2.1201	57	muscle control	8	sodium acids oligopeptides
SRP-DEPENDENT COTRANSLATIONAL PROTEIN TARGETING TO MEMBRANE%GOBP%GO:0006614	SRP-dependent cotranslational protein targeting to membrane	90	0	0	3.29	1	protein translation	13	complex decay targeting
SRP-DEPENDENT COTRANSLATIONAL PROTEIN TARGETING TO MEMBRANE%REACTOME%R-HSA-1799339.2	SRP-dependent cotranslational protein targeting to membrane	113	0	0	3.1471	1	protein translation	13	complex decay targeting
ST_G_ALPHA_I_PATHWAY%MSIGDB_C2%ST_G_ALPHA_I_PATHWAY	ST_G_ALPHA_I_PATHWAY	35	0	0.0007	-2.1811	200	growth regulation	3	st alpha pathway
ST_INTEGRIN_SIGNALING_PATHWAY%MSIGDB_C2%ST_INTEGRIN_SIGNALING_PATHWAY	ST_INTEGRIN_SIGNALING_PATHWAY	82	0	0	-2.5918	12	ECM	9	hepatocyte vegfr3 angiogenesis
ST_JNK_MAPK_PATHWAY%MSIGDB_C2%ST_JNK_MAPK_PATHWAY	ST_JNK_MAPK_PATHWAY	39	0	0.0046	-1.961	102	growth regulation	3	stress activated protein
STABILIZATION AND EXPANSION OF THE E-CADHERIN ADHERENS JUNCTION%PATHWAY INTERACTION DATABASE NCI-NATURE CURATED DATA%STABILIZATION AND EXPANSION OF THE E-CADHERIN ADHERENS JUNCTION	Stabilization and expansion of the E-cadherin adherens junction	41	0	0.0006	-2.1821	124	ECM	9	stabilization pathway expansion
STEM CELL DIVISION%GOBP%GO:0017145	stem cell division	18	0.0038	0.0099	-1.8566	104	transcription	5	stem cell division
STEM CELL PROLIFERATION%GOBP%GO:0072089	stem cell proliferation	37	0	0.0051	-1.9438	104	transcription	5	stem cell division
STIMULI-SENSING CHANNELS%REACTOME DATABASE ID RELEASE 72%2672351	Stimuli-sensing channels	99	0	0	-2.4341	91	cytoskeleton	4	trp channels stimuli
STRESS-ACTIVATED PROTEIN KINASE SIGNALING CASCADE%GOBP%GO:0031098	stress-activated protein kinase signaling cascade	115	0	0.0025	-2.0321	102	growth regulation	3	stress activated protein
SUBSTRATE ADHESION-DEPENDENT CELL SPREADING%GOBP%GO:0034446	substrate adhesion-dependent cell spreading	38	0	0.0052	-1.9412	106	ECM	9	substrate dependent spreading
SUBSTRATE-DEPENDENT CELL MIGRATION%GOBP%GO:0006929	substrate-dependent cell migration	16	0	0	-2.4462	170	cytoskeleton	4	substrate dependent cell
SUMO E3 LIGASES SUMOYLATE TARGET PROTEINS%REACTOME%R-HSA-3108232.5	SUMO E3 ligases SUMOylate target proteins	169	0	0.0022	-2.0435	4	transcription	5	mature sumoylation ubiquitinylation
SUMOYLATION OF INTRACELLULAR RECEPTORS%REACTOME DATABASE ID RELEASE 72%4090294	SUMOylation of intracellular receptors	24	0	0.0004	-2.2134	64	transcription	5	rxr rar heterodimerization
SUMOYLATION OF SUMOYLATION PROTEINS%REACTOME DATABASE ID RELEASE 72%4085377	SUMOylation of SUMOylation proteins	31	0.0036	0.0093	-1.868	4	transcription	5	mature sumoylation ubiquitinylation
SUMOYLATION OF UBIQUITINYLATION PROTEINS%REACTOME DATABASE ID RELEASE 72%3232142	SUMOylation of ubiquitinylation proteins	34	0	0.0055	-1.9341	4	transcription	5	mature sumoylation ubiquitinylation
SUMOYLATION%REACTOME DATABASE ID RELEASE 72%2990846	SUMOylation	175	0	0.0018	-2.0676	4	transcription	5	mature sumoylation ubiquitinylation
SUPERPATHWAY OF INOSITOL PHOSPHATE COMPOUNDS%HUMANCYC%PWY-6371	superpathway of inositol phosphate compounds	67	0	0	-2.5639	8	muscle control	8	calcium inositol phosphate
SYNAPSE ASSEMBLY%GOBP%GO:0007416	synapse assembly	71	0	0.003	-2.0082	19	neural development	7	dendritic spine presynapse
SYNAPSE ORGANIZATION%GOBP%GO:0050808	synapse organization	176	0	0	-2.4313	19	neural development	7	dendritic spine presynapse
SYNAPTIC ADHESION-LIKE MOLECULES%REACTOME DATABASE ID RELEASE 72%8849932	Synaptic adhesion-like molecules	21	0	0.0033	-1.9969	53	ECM	9	phosphatases neurexins neuroligins
SYNAPTIC TRANSMISSION, GLUTAMATERGIC%GOBP%GO:0035249	synaptic transmission, glutamatergic	28	0	0	-2.6436	9	neural development	7	glutamate receptors nmda
SYNAPTIC VESICLE CYCLE%GOBP%GO:0099504	synaptic vesicle cycle	85	0	0.0015	-2.0885	49	neural development	7	vesicle recycling endocytosis
SYNAPTIC VESICLE ENDOCYTOSIS%GOBP%GO:0048488	synaptic vesicle endocytosis	35	0	0.0002	-2.29	49	neural development	7	vesicle recycling endocytosis
SYNAPTIC VESICLE RECYCLING%GOBP%GO:0036465	synaptic vesicle recycling	42	0	0.0004	-2.228	49	neural development	7	vesicle recycling endocytosis
SYNTHESIS OF IP3 AND IP4 IN THE CYTOSOL%REACTOME%R-HSA-1855204.3	Synthesis of IP3 and IP4 in the cytosol	25	0	0.0032	-2.0009	8	muscle control	8	calcium inositol phosphate
SYNTHESIS OF PIPS AT THE EARLY ENDOSOME MEMBRANE%REACTOME%R-HSA-1660516.7	Synthesis of PIPs at the early endosome membrane	16	0.0019	0.0011	-2.1317	15	cytoskeleton	4	synthesis pips phosphatidylinositol
SYNTHESIS OF PIPS AT THE GOLGI MEMBRANE%REACTOME DATABASE ID RELEASE 72%1660514	Synthesis of PIPs at the Golgi membrane	17	0.0075	0.0098	-1.8595	15	cytoskeleton	4	synthesis pips phosphatidylinositol
SYNTHESIS OF PIPS AT THE PLASMA MEMBRANE%REACTOME DATABASE ID RELEASE 72%1660499	Synthesis of PIPs at the plasma membrane	52	0	0	-2.429	15	cytoskeleton	4	synthesis pips phosphatidylinositol
T CELL ACTIVATION INVOLVED IN IMMUNE RESPONSE%GOBP%GO:0002286	T cell activation involved in immune response	49	0	0.0022	2.1207	5	immune	6	type interferon proliferation
T CELL ACTIVATION%PANTHER PATHWAY%P00053	T cell activation	61	0	0.0034	-1.9944	34	growth regulation	3	egf pathway biopeptides
TCR SIGNALING IN NAIVE CD4+ T CELLS%PATHWAY INTERACTION DATABASE NCI-NATURE CURATED DATA%TCR SIGNALING IN NAIVE CD4+ T CELLS	TCR signaling in naive CD4+ T cells	65	0	0.0058	-1.9259	101	immune	6	tcr signaling cells
TELENCEPHALON CELL MIGRATION%GOBP%GO:0022029	telencephalon cell migration	24	0	0.0011	-2.1263	18	neural development	7	forebrain neurons development
TELENCEPHALON DEVELOPMENT%GOBP%GO:0021537	telencephalon development	91	0	0.0001	-2.359	18	neural development	7	forebrain neurons development
TGF_BETA_RECEPTOR%IOB%TGF_BETA_RECEPTOR	TGF_beta_Receptor	191	0	0.0006	-2.1968	36	growth regulation	3	tgf tgfbr tgfb
TGF-BETA RECEPTOR SIGNALING%PATHWAY INTERACTION DATABASE NCI-NATURE CURATED DATA%TGF-BETA RECEPTOR SIGNALING	TGF-beta receptor signaling	51	0	0.002	-2.0537	36	growth regulation	3	tgf tgfbr tgfb
THROMBOXANE A2 RECEPTOR SIGNALING%PATHWAY INTERACTION DATABASE NCI-NATURE CURATED DATA%THROMBOXANE A2 RECEPTOR SIGNALING	Thromboxane A2 receptor signaling	55	0	0.0039	-1.9793	75	immune	6	il8 cxcr2 thromboxane
THYROTROPIN-RELEASING HORMONE RECEPTOR SIGNALING PATHWAY%PANTHER PATHWAY%P04394	Thyrotropin-releasing hormone receptor signaling pathway	56	0	0.0057	-1.9307	88	growth regulation	3	thyrotropin releasing hormone
TRAF6 MEDIATED IRF7 ACTIVATION%REACTOME%R-HSA-933541.4	TRAF6 mediated IRF7 activation	29	0	0	2.4981	5	immune	6	type interferon proliferation
TRAFFICKING OF AMPA RECEPTORS%REACTOME%R-HSA-399719.1	Trafficking of AMPA receptors	26	0	0	-2.4317	9	neural development	7	glutamate receptors nmda
TRANSCRIPTIONAL REGULATION BY MECP2%REACTOME%R-HSA-8986944.2	Transcriptional Regulation by MECP2	58	0	0.0004	-2.2153	80	neural development	7	mecp2 neuronal channels
TRANSEPITHELIAL TRANSPORT%GOBP%GO:0070633	transepithelial transport	19	0	0.0011	-2.1203	193	cytoskeleton	4	transepithelial transport
TRANSLATION INITIATION COMPLEX FORMATION%REACTOME DATABASE ID RELEASE 72%72649	Translation initiation complex formation	59	0	0	2.4916	1	protein translation	13	complex decay targeting
TRANSLATIONAL INITIATION%GOBP%GO:0006413	translational initiation	122	0	0	2.9399	1	protein translation	13	complex decay targeting
TRANSLATIONAL TERMINATION%GOBP%GO:0006415	translational termination	95	0	0.0057	2.0209	33	protein translation	13	mitochondrial elongation termination
TRANSMISSION OF NERVE IMPULSE%GOBP%GO:0019226	transmission of nerve impulse	33	0	0.0002	-2.2747	7	muscle control	8	action contraction cardiac
TRANSPORT ALONG MICROTUBULE%GOBP%GO:0010970	transport along microtubule	129	0	0.0009	-2.1465	44	cytoskeleton	4	transport based cytoskeletal
TRANSPORT OF INORGANIC CATIONS ANIONS AND AMINO ACIDS OLIGOPEPTIDES%REACTOME%R-HSA-425393.2	Transport of inorganic cations anions and amino acids oligopeptides	104	0	0.001	-2.1353	57	muscle control	8	sodium acids oligopeptides
TRANSPORT OF MATURE MRNA DERIVED FROM AN INTRONLESS TRANSCRIPT%REACTOME%R-HSA-159231.2	Transport of Mature mRNA Derived from an Intronless Transcript	37	0.0018	0.0057	-1.9296	4	transcription	5	mature sumoylation ubiquitinylation
TRANSPORT OF MATURE MRNAS DERIVED FROM INTRONLESS TRANSCRIPTS%REACTOME DATABASE ID RELEASE 72%159234	Transport of Mature mRNAs Derived from Intronless Transcripts	38	0.0018	0.0069	-1.9058	4	transcription	5	mature sumoylation ubiquitinylation
TRANSPORT OF RIBONUCLEOPROTEINS INTO THE HOST NUCLEUS%REACTOME DATABASE ID RELEASE 72%168271	Transport of Ribonucleoproteins into the Host Nucleus	28	0	0.0016	-2.0788	4	transcription	5	mature sumoylation ubiquitinylation
TRANSPORT OF THE SLBP DEPENDANT MATURE MRNA%REACTOME DATABASE ID RELEASE 72%159230	Transport of the SLBP Dependant Mature mRNA	31	0.0036	0.01	-1.8558	4	transcription	5	mature sumoylation ubiquitinylation
TRANSPORT OF THE SLBP INDEPENDENT MATURE MRNA%REACTOME%R-HSA-159227.2	Transport of the SLBP independent Mature mRNA	30	0.0018	0.0081	-1.8845	4	transcription	5	mature sumoylation ubiquitinylation
TRP CHANNELS%REACTOME DATABASE ID RELEASE 72%3295583	TRP channels	25	0	0.0033	-1.9977	91	cytoskeleton	4	trp channels stimuli
TSLP%NETPATH%TSLP	TSLP	163	0	0.0004	-2.2325	58	immune	6	ifn gamma tslp
TYPE I INTERFERON SIGNALING PATHWAY%GOBP%GO:0060337	type I interferon signaling pathway	64	0	0.0003	2.2966	5	immune	6	type interferon proliferation
UNBLOCKING OF NMDA RECEPTORS, GLUTAMATE BINDING AND ACTIVATION%REACTOME%R-HSA-438066.3	Unblocking of NMDA receptors, glutamate binding and activation	20	0	0.0012	-2.1108	9	neural development	7	glutamate receptors nmda
VASCULAR ENDOTHELIAL GROWTH FACTOR RECEPTOR SIGNALING PATHWAY%GOBP%GO:0048010	vascular endothelial growth factor receptor signaling pathway	66	0	0.0011	-2.1295	31	growth regulation	3	vegfa vegfr2 vegfr1
VEGFA-VEGFR2 PATHWAY%REACTOME DATABASE ID RELEASE 72%4420097	VEGFA-VEGFR2 Pathway	91	0	0.0001	-2.3411	31	growth regulation	3	vegfa vegfr2 vegfr1
VEGFR2 MEDIATED VASCULAR PERMEABILITY%REACTOME DATABASE ID RELEASE 72%5218920	VEGFR2 mediated vascular permeability	26	0	0.0016	-2.0776	31	growth regulation	3	vegfa vegfr2 vegfr1
VEGFR3 SIGNALING IN LYMPHATIC ENDOTHELIUM%PATHWAY INTERACTION DATABASE NCI-NATURE CURATED DATA%VEGFR3 SIGNALING IN LYMPHATIC ENDOTHELIUM	VEGFR3 signaling in lymphatic endothelium	25	0.0019	0.0052	-1.9426	12	ECM	9	hepatocyte vegfr3 angiogenesis
VESICLE CYTOSKELETAL TRAFFICKING%GOBP%GO:0099518	vesicle cytoskeletal trafficking	62	0	0.0031	-2.0045	44	cytoskeleton	4	transport based cytoskeletal
VESICLE TRANSPORT ALONG ACTIN FILAMENT%GOBP%GO:0030050	vesicle transport along actin filament	19	0	0.0006	-2.1942	44	cytoskeleton	4	transport based cytoskeletal
VESICLE-MEDIATED TRANSPORT IN SYNAPSE%GOBP%GO:0099003	vesicle-mediated transport in synapse	92	0	0.0014	-2.0974	49	neural development	7	vesicle recycling endocytosis
VESICLE-MEDIATED TRANSPORT TO THE PLASMA MEMBRANE%GOBP%GO:0098876	vesicle-mediated transport to the plasma membrane	76	0	0.0074	-1.8964	17	neural development	7	protein localization periphery
VIRAL GENE EXPRESSION%GOBP%GO:0019080	viral gene expression	130	0	0	2.561	1	protein translation	13	complex decay targeting
VIRAL MRNA TRANSLATION%REACTOME%R-HSA-192823.3	Viral mRNA Translation	90	0	0	3.3065	1	protein translation	13	complex decay targeting
VIRAL TRANSCRIPTION%GOBP%GO:0019083	viral transcription	113	0	0	2.5746	1	protein translation	13	complex decay targeting
WNT SIGNALING PATHWAY, CALCIUM MODULATING PATHWAY%GOBP%GO:0007223	Wnt signaling pathway, calcium modulating pathway	35	0	0.0011	-2.1303	112	muscle control	8	calcium modulating ca2
WNT%IOB%WNT	Wnt	117	0	0.004	-1.9755	86	growth regulation	3	wnt
WNT%NETPATH%WNT	Wnt	118	0	0.0031	-2.0057	86	growth regulation	3	wnt
ZINC ION HOMEOSTASIS%GOBP%GO:0055069	zinc ion homeostasis	31	0	0.0015	2.158	26	environment sensing	11	zinc copper cadmium
