# Supplementary material for: Control of tissue development and cell diversity by cell cycle-dependent transcriptional filtering
Source: eLife. 2021 Jul 2;10:e64951. doi: 10.7554/eLife.64951 (PMC8279763; doi:10.7554/eLife.64951)
Supplement: Supplementary file 5. [file elife-64951-supp5.csv]

Theme	Words used to group the pathways in the category
aging	adult	aging	lifespan	mannose trimming	maturation	senescence
auditory	auditory	cochlea	cochlear	ear	equilibrioception	ganglionic eminence	gravity	inner ear	middle ear	otic placode	otolith	perception	semicircular	sound	stereocilium	vestibular	vestibuloocular
behavior	behavior	learning
blastocyst	blastocyst	chorion	egg	embryo	embryonic	epiboly	gastrulation	germ		hatching	implantation	inner mass	Spemann organizer	placenta	placental	primary germ	spongiotrophoblast	syncytiotrophoblast	trophectodermal	umbilical cord	endoderm	ectoderm
blood-vessel	angiogenesis	angiotensin	angiotensin-activated	angiotensin-mediated	aorta	aortic	arterial	artery	blood	capillary	carotid	circulation	circulatory	clot	clotting	coagulation	coronary	delamination	endothelial	glomus	pericyte	renin-angiotensin	valve	vascular	vascular endothelial growth factor	vasculature	vasculogenesis	vasoconstriction	vasodilation	vasomotion	vasopressin	VEGF-activated	vein	venous	venule
brain	amygdala	amyloid	amyloid-beta	astrocyte	axon	axonal	axonemal	axonogenesis	Bergmann	brain	brain-derived	brainstem	branchiomotor	brown	bud	bulb	bundle	corpus callosum	cerebellar	cerebellum	cerebral	cerebrospinal	ceruleus	cortex	dendrite	diencephalon	enteric	equilibrioception	fasciculation	forebrain	forebrain-midbrain	GABAergic	ganglia	ganglion	ganglioside	GDP	GDP-fucose	GDP-L-fucose	GDP-mannose	generation	geniculate	gland	glia	glial	gliogenesis	globus	glomerular	glycine	granular
calcium	calcium
catabolic	catabolic
cell-cycle	cell cycle	G0	G1	G1/S	G2
cell-death	cell death	autophagy	pyroptosome	apptosis	necrosis	anoikis	aggrephagy
cell-division	actomyosin	anaphase	centromere	centromeric	chromatid	cleavage	cytokinesis	cytokinetic	division	furrow	G1	G1/S	G2	G2/M	genetic	germline	meiosis	meiotic	metaphase	metaphase/anaphase	microtubule	microtubules	mitosis	mitotic	recombination	spindle
cell-size	contact inhibition	diameter	size	volume
cellular-response	cellular response
circadian-rhythm	circadian	rhythm	rhythmic
cytosis-osome-vesicle	osome	cytosis	microtubule	tubulin	non-autophagi	clathrin coat	trans-Golgi	vacuolar	vacuole	vesicle	SNARE
cytoskeleton	actin	cytoskeleton
dendritic-cell	dendritic cell
differentiation	differentiation	dedifferentiation	cell fate	transdifferentiation
DNA-repair	DNA break	DNA repair	breakage	break-induced	double-strand	helicase	ligase	ligation	unwinding	damage
ecm	ecm	extracellular
environment-sensing	oxygen	photoperiodism	thigmotaxis	chemotaxis	chemokine
epidermis	cornified envelope assembly	corneocyte	cuticle	desquamation	envelope	epidermal	epidermis	epididymis	hemidesmosome	keratinocyte	sebaceous	skin
eye	cone	eye	ganglion	horizontal cell	hyaloid	lens	light	optic	peyer's patch	photoreceptor	retina	rhodopsin	rod	trabecular meshwork	visual
glands	acinar	allantois	glands	Harderian	lacrimal	uterine	salivary	thyroid	glandular acinus	prostate	prostate-gland	prostatic
growth-regualtion	regulation	growth
gut	brush border assembly	cloacal septation	defecation	foregut	fungiform	gastric	gut	hindgut	intestinal	intestine	midgut	molybdenum	mouth	stomach	taste	tongue	tracheoesophageal	villi
hair	hair	nail	sebum secreting cell	follicle
heart	allantois	atrial	atrioventricular	atrium	AV	cardiac	cardioblast	cardiocyte	cardiovascular	coronary	endocardial	endocardium	epicardium	epicardium-derived	foramen ovale	heart	mitral	myocardium	myofibril	myofibroblast	SA node	pericardium	proepicardium	septum secundum	semi-lunar	sinoatrial	synoviocyte	tricuspid	valve	vascular	vasculature	vasculogenesis	vasoconstriction	ventricle	ventricular
hematopoiesis	hematopoiesis	hematopoietic	mononuclear cell	myeloid leukocyte
histone-chromatin	histone	chromatin
homeostasis	homeostasis
immune	antigen	geniculate	hypersensitivity	iga	ige	igg	immune	immunoglobulin	inflamasome	interferon	interleukin	MHC	phospholipase A2 activity	TGF beta	tool-like receptor	transcytosis	xenophagy
kidney-ureter	bladder	glomerular	glomerulus	Henle	kidney	limb	loop	macula	maintenance	maturation	medulla	medullary	membrane	mesangial	mesangium	mesenchymal	mesenchyme	mesoderm	mesonephric	mesonephros	metanephric	metanephros	nephric	nephrogenic	nephron	pronephric	pronephros	renal	seminiferous	Sertoli	ureter	ureteric	urinary	urine	urogenital	urothelial	urothelium	cloaca
kinase	kinase
limb	limb
lipid	acylglycerol acyl-chain	adipose	adopinectin	brown	caveola	lipase	lipid	prostagladin	white
liver	bile	cholangiocyte	chylomicron	hepatic	hepatoblast	hepatocyte	kupffer's vescle	liver	urea cycle
lung	alveolar	alveolus	bronchiole	bronchus	lobe	lung	lung-associated	pharyngeal	pharynx	pneumocyte	pulmonary	saccule	trabecula	trachea
lymphoid	agranulocutes	B cell	leukocyte	lymphocyte	lymphoid	Nautral killer	plasma cell	T cell	thumus	T-helper	thymic	thymocyte
mammary-gland	lactation	mammary-gland	prolactin
MAPK	Erk	Janus	JNK	MAPK	MAP Kinase
melanocyte	melanocyte	melanosome	pigment	pigmentation
mesoderm	mesenchymal	mesenchyme	mesendoderm	mesoderm	mesodermal	somite
metabolic-biosynthesis	ATP	bioisynthesis	CDP-choline	glycine	lectin	mannosylation	metabolic	metabolic-biosynthesis	transsulfuration	xenobiotic glucuronidation
methylation	imprinting	methylation
microglia	mricoglia
migration	delamination	locomotion	migration	projection	substrate adhesion
mitochondrion	[2Fe-2S] cluster assembly	cytochrome	mitochondrion
monocyte	macrophages	monocyte	stellate
morphogenesis	morphogenesis
multicellular	multicellular
muscle-control	actin-myosin	actomyosin	contractile	filament-based	muscle	myofibroblast	myosin	myosin-light-chain-phosphatase	myotome	myotube	peristalsis	reflex	stretch	cardiac muscle	cardiocyte	Purkinje myocyte	motor neuron	neuromusclular	myoblast	sarcoplasmic	striated muscle	arcomere	sarcomerogenesis	skeletal muscle	slow/fast fiber	smooth muscle	cardiac muscle	cardiocyte	Purkinje myocyte
myeloid	basophil	bone marrow	eosinophil	granulocytes	inflamatory	myeloid	neutrophil	spleen
nerve	cranial nerve	dermatome	nerve	nerve	vagus nerve
neural-crest	neural crest
neural-tube	neural-tube	roof plate formation
neuron	neuron
neurotransmitters	Acetylcholine	Adenylyl cyclase	adrenergic receptor	aminobutyric	Ammonia assimilation	dopamine	epinephrine	glutamate	neurotransmitter	noepinephrine	serotonin
notch	notch
olfactory	nose	olfactory	palate	smell	roof of mouth
osteo-bone	amelogenesis	bone	cartilage	cell	chondroblast	chondrocyte	endochondral	mineralization	morphogenesis	ossification	osteoblast	osteoclast	sclerotome	skeletal	trabecula	viscerocranium	tooth	ameloblast	dentin
oxidation	oxidation
pancreas	insulin	pancreas	pancreatic	trypsinogen activation	islet
pathogen	bacteria	lipoteichoic	pathogen	viral	virus
peptide	peptidyl
phosphorylation	phosphorylation
polarity-axis	ap	dorval/ventral	pattern	P granule organization	polarity	polarity-axis
protein-processing	endoplasmic	er	folding	transmembrane	protein	ubiquit	unfold
red-blood	bilirubin	erythrocytes	erythroid cells	megakaryocyte	platelets
regeneration-healing	healing	regeneration	wounding	wound healing
replication	DNA	DNA-containing	DNA-dependent	DNA-directed	DNA-mediated	double	elongation	endodeoxyribonuclease	endoreduplication	fork	helicase	holoenzyme	lagging	leading	Okazaki	primer	replication	replication-dependent	replication-independent	synthesis	t-circle	telomerase	telomeric	termination	topoisomerase	transposition,	unwinding
reproduction	anti-Mullerian hormone	brood	female	gamete	gonad	granulosa	luteolysis	male	mating	meiosis	ovary	oviduct	parturition	primary follicle	reproduction	Sertoli	uterine
ribosome	ribo	ribosome	rRNA	tRNA	snRNA
rna-processing	adenosine to inosine editing	Cajal body	cap-dependent translation	cap1	cap2	capping	mRNA	ncRNA	polyadenylation	polyadenylation-dependent	polymerase	polyuridylation-dependent	positive	posttranscriptional	pre-mRNA	splice	spliceosomal	spliceosome	splicing	splicing,	stability	stabilization	stem-loop
secretion	secretion
signalling	receptor	signaling	transduction
spine	spine	nervous	spinal
stress-response	stress
synapse	synapse	synaptic
telomere	telomere	telomerase
tendon	tendon
thorax	diaphragm	thorax
transcription	mRNA	polymerase
translation	translation
transport	golgi	import
[truncated: 79 more columns]
