# Supplementary material for: Control of tissue development and cell diversity by cell cycle-dependent transcriptional filtering
Source: eLife. 2021 Jul 2;10:e64951. doi: 10.7554/eLife.64951 (PMC8279763; doi:10.7554/eLife.64951)
Supplement: Supplementary file 6. [file elife-64951-supp6.csv]

go_id	pathway_name	pathway_name
GO:0055114	oxidation-reduction process	oxidation
GO:0009060	aerobic respiration	lung
GO:0006120	mitochondrial electron transport, NADH to ubiquinone	mitochondrion
GO:0032981	mitochondrial respiratory chain complex I assembly	mitochondrion
GO:0014070	response to organic cyclic compound	environment-sensing
GO:0033194	response to hydroperoxide	environment-sensing
GO:0042493	response to drug	cellular-response
GO:0072593	reactive oxygen species metabolic process	metabolic-biosynthesis
GO:1902600	proton transmembrane transport	transport
GO:0022900	electron transport chain	transport
GO:0006123	mitochondrial electron transport, cytochrome c to oxygen	mitochondrion
GO:0015990	electron transport coupled proton transport	transport
GO:0006119	oxidative phosphorylation	metabolic-biosynthesis
GO:0006979	response to oxidative stress	stress-response
GO:0007568	aging	aging
GO:0021549	cerebellum development	brain
GO:0022904	respiratory electron transport chain	transport
GO:0046688	response to copper ion	cellular-response
GO:0051602	response to electrical stimulus	cellular-response
GO:0007595	lactation	glands
GO:0009409	response to cold	environment-sensing
GO:0010729	positive regulation of hydrogen peroxide biosynthetic process	metabolic-biosynthesis
GO:0010940	positive regulation of necrotic cell death	cell-death
GO:0042773	ATP synthesis coupled electron transport	transport
GO:2001171	positive regulation of ATP biosynthetic process	metabolic-biosynthesis
GO:0015986	ATP synthesis coupled proton transport	transport
GO:0006811	ion transport	transport
GO:0006754	ATP biosynthetic process	metabolic-biosynthesis
GO:0042407	cristae formation	mitochondrion
GO:0042776	mitochondrial ATP synthesis coupled proton transport	mitochondrion
GO:0055093	response to hyperoxia	environment-sensing
GO:0019646	aerobic electron transport chain	transport
GO:0055085	transmembrane transport	transport
GO:0008535	respiratory chain complex IV assembly	lung
GO:0009642	response to light intensity	eye
GO:0009725	response to hormone	cellular-response
GO:0071385	cellular response to glucocorticoid stimulus	cellular-response
GO:0001666	response to hypoxia	environment-sensing
GO:0001701	in utero embryonic development	blastocyst
GO:0035094	response to nicotine	cellular-response
GO:0045471	response to ethanol	cellular-response
GO:0010243	response to organonitrogen compound	cellular-response
GO:0042542	response to hydrogen peroxide	environment-sensing
GO:0042220	response to cocaine	cellular-response
GO:0006122	mitochondrial electron transport, ubiquinol to cytochrome c	mitochondrion
GO:0007584	response to nutrient	cellular-response
GO:0009408	response to heat	environment-sensing
GO:0009636	response to toxic substance	cellular-response
GO:0031100	animal organ regeneration	regeneration-healing
GO:0033590	response to cobalamin	cellular-response
GO:0033762	response to glucagon	cellular-response
GO:0042538	hyperosmotic salinity response	environment-sensing
GO:0046686	response to cadmium ion	cellular-response
GO:0046689	response to mercury ion	cellular-response
GO:0051592	response to calcium ion	cellular-response
GO:0018101	protein citrullination	protein-processing
GO:0006325	chromatin organization	histone-chromatin
GO:0036414	histone citrullination	histone-chromatin
GO:0051301	cell division	cell-division
GO:0007049	cell cycle	cell-cycle
GO:0007229	integrin-mediated signaling pathway	ecm
GO:0030334	regulation of cell migration	migration
GO:0048041	focal adhesion assembly	ecm
GO:0010971	positive regulation of G2/M transition of mitotic cell cycle	cell-division
GO:0051895	negative regulation of focal adhesion assembly	ecm
GO:1900025	negative regulation of substrate adhesion-dependent cell spreading	migration
GO:0034260	negative regulation of GTPase activity	brain
GO:0051987	positive regulation of attachment of spindle microtubules to kinetochore	cell-division
GO:0072356	chromosome passenger complex localization to kinetochore	cell-division
GO:0007165	signal transduction	signalling
GO:0002376	immune system process	immune
GO:0006915	apoptotic process	cell-death
GO:0006954	inflammatory response	myeloid
GO:0045087	innate immune response	immune
GO:0032088	negative regulation of NF-kappaB transcription factor activity	transcription
GO:0050718	positive regulation of interleukin-1 beta secretion	immune
GO:0043280	positive regulation of cysteine-type endopeptidase activity involved in apoptotic process	cell-death
GO:0010951	negative regulation of endopeptidase activity	protein-processing
GO:0071222	cellular response to lipopolysaccharide	cellular-response
GO:0071347	cellular response to interleukin-1	immune
GO:1900016	negative regulation of cytokine production involved in inflammatory response	myeloid
GO:0050713	negative regulation of interleukin-1 beta secretion	immune
GO:0010955	negative regulation of protein processing	protein-processing
GO:1905246	negative regulation of aspartic-type peptidase activity	peptide
GO:0006281	DNA repair	DNA-repair
GO:0006310	DNA recombination	replication
GO:0006974	cellular response to DNA damage stimulus	DNA-repair
GO:0097190	apoptotic signaling pathway	cell-death
GO:0016579	protein deubiquitination	protein-processing
GO:0043065	positive regulation of apoptotic process	cell-death
GO:0007186	G protein-coupled receptor signaling pathway	signalling
GO:0002250	adaptive immune response	immune
GO:0043312	neutrophil degranulation	myeloid
GO:2000515	negative regulation of CD4-positive, alpha-beta T cell activation	lymphoid
GO:0006388	tRNA splicing, via endonucleolytic cleavage and ligation	ribosome
GO:0000379	tRNA-type intron splice site recognition and cleavage	ribosome
GO:0006397	mRNA processing	rna-processing
GO:0008033	tRNA processing	ribosome
GO:0090305	nucleic acid phosphodiester bond hydrolysis	DNA-repair
GO:0090501	RNA phosphodiester bond hydrolysis	rna-processing
GO:0090502	RNA phosphodiester bond hydrolysis, endonucleolytic	rna-processing
GO:0006355	regulation of transcription, DNA-templated	transcription
GO:0007275	multicellular organism development	multicellular
GO:0031047	gene silencing by RNA	transcription
GO:0006977	DNA damage response, signal transduction by p53 class mediator resulting in cell cycle arrest	DNA-repair
GO:0000288	nuclear-transcribed mRNA catabolic process, deadenylation-dependent decay	rna-processing
GO:0000289	nuclear-transcribed mRNA poly(A) tail shortening	rna-processing
GO:0006417	regulation of translation	translation
GO:0017148	negative regulation of translation	translation
GO:2000036	regulation of stem cell population maintenance	cell-division
GO:0120162	positive regulation of cold-induced thermogenesis	environment-sensing
GO:0006468	protein phosphorylation	phosphorylation
GO:0035556	intracellular signal transduction	signalling
GO:0045944	positive regulation of transcription by RNA polymerase II	transcription
GO:0016310	phosphorylation	metabolic-biosynthesis
GO:0043066	negative regulation of apoptotic process	cell-death
GO:0045597	positive regulation of cell differentiation	differentiation
GO:0030307	positive regulation of cell growth	growth-regulation
GO:0043154	negative regulation of cysteine-type endopeptidase activity involved in apoptotic process	cell-death
GO:0043620	regulation of DNA-templated transcription in response to stress	transcription
GO:0072574	hepatocyte proliferation	liver
GO:0043555	regulation of translation in response to stress	translation
GO:2000491	positive regulation of hepatic stellate cell activation	monocyte
GO:0006629	lipid metabolic process	lipid
GO:0008654	phospholipid biosynthetic process	lipid
GO:0006644	phospholipid metabolic process	lipid
GO:0036149	phosphatidylinositol acyl-chain remodeling	lipid
GO:0021819	layer formation in cerebral cortex	brain
GO:0006412	translation	translation
GO:0019083	viral transcription	immune
GO:0008284	positive regulation of cell population proliferation	cell-division
GO:0006413	translational initiation	translation
GO:0006364	rRNA processing	ribosome
GO:0000184	nuclear-transcribed mRNA catabolic process, nonsense-mediated decay	rna-processing
GO:0006614	SRP-dependent cotranslational protein targeting to membrane	translation
GO:0045903	positive regulation of translational fidelity	translation
GO:0034220	ion transmembrane transport	transport
GO:0006334	nucleosome assembly	histone-chromatin
GO:0006464	cellular protein modification process	protein-processing
GO:0006338	chromatin remodeling	histone-chromatin
GO:0019827	stem cell population maintenance	cell-division
GO:0036413	histone H3-R26 citrullination	histone-chromatin
GO:0050776	regulation of immune response	immune
GO:0038065	collagen-activated signaling pathway	signalling
GO:0030316	osteoclast differentiation	osteo-bone
GO:0051497	negative regulation of stress fiber assembly	cytoskeleton
GO:0030335	positive regulation of cell migration	migration
GO:2000810	regulation of bicellular tight junction assembly	cytoskeleton
GO:0035329	hippo signaling	growth-regulation
GO:0150105	protein localization to cell-cell junction	ecm
GO:1902396	protein localization to bicellular tight junction	ecm
GO:0007043	cell-cell junction assembly	ecm
GO:0090557	establishment of endothelial intestinal barrier	blood-vessel
GO:2000049	positive regulation of cell-cell adhesion mediated by cadherin	cell-adhesion
GO:0071896	protein localization to adherens junction	ecm
GO:0031032	actomyosin structure organization	cytoskeleton
GO:0034334	adherens junction maintenance	protein-processing
GO:0045216	cell-cell junction organization	signalling
GO:0051493	regulation of cytoskeleton organization	cytoskeleton
GO:1901888	regulation of cell junction assembly	ecm
GO:1903672	positive regulation of sprouting angiogenesis	blood-vessel
GO:1905605	positive regulation of maintenance of permeability of blood-brain barrier	brain
GO:2000250	negative regulation of actin cytoskeleton reorganization	cytoskeleton
GO:0042572	retinol metabolic process	eye
GO:0042574	retinal metabolic process	eye
GO:0015718	monocarboxylic acid transport	transport
GO:0050900	leukocyte migration	lymphoid
GO:0007098	centrosome cycle	cytoskeleton
GO:0006090	pyruvate metabolic process	metabolic-biosynthesis
GO:0015728	mevalonate transport	transport
GO:0035879	plasma membrane lactate transport	transport
GO:0035873	lactate transmembrane transport	transport
GO:0006749	glutathione metabolic process	metabolic-biosynthesis
GO:1901687	glutathione derivative biosynthetic process	metabolic-biosynthesis
GO:0045893	positive regulation of transcription, DNA-templated	transcription
GO:0000398	mRNA splicing, via spliceosome	rna-processing
GO:0000244	spliceosomal tri-snRNP complex assembly	rna-processing
GO:0007030	Golgi organization	transport
GO:0032049	cardiolipin biosynthetic process	metabolic-biosynthesis
GO:0007596	blood coagulation	blood-vessel
GO:0007599	hemostasis	environment-sensing
GO:0030168	platelet activation	red-blood
GO:0007167	enzyme linked receptor protein signaling pathway	signalling
GO:0098869	cellular oxidant detoxification	liver
GO:0034599	cellular response to oxidative stress	cellular-response
GO:0042744	hydrogen peroxide catabolic process	catabolic
GO:0006357	regulation of transcription by RNA polymerase II	transcription
GO:0006366	transcription by RNA polymerase II	transcription
GO:0046856	phosphatidylinositol dephosphorylation	phosphorylation
GO:0050852	T cell receptor signaling pathway	lymphoid
GO:0006661	phosphatidylinositol biosynthetic process	cytoskeleton
GO:0019221	cytokine-mediated signaling pathway	signalling
GO:0006796	phosphate-containing compound metabolic process	metabolic-biosynthesis
GO:0043647	inositol phosphate metabolic process	metabolic-biosynthesis
GO:0007218	neuropeptide signaling pathway	brain
GO:0006886	intracellular protein transport	protein-processing
GO:0050790	regulation of catalytic activity	metabolic-biosynthesis
GO:0043086	negative regulation of catalytic activity	metabolic-biosynthesis
GO:0046883	regulation of hormone secretion	secretion
GO:0016486	peptide hormone processing	protein-processing
GO:0007608	sensory perception of smell	olfactory
GO:0050896	response to stimulus	environment-sensing
GO:0007635	chemosensory behavior	behavior
GO:0036297	interstrand cross-link repair	DNA-repair
GO:0000724	double-strand break repair via homologous recombination	DNA-repair
GO:0006289	nucleotide-excision repair	DNA-repair
GO:0033683	nucleotide-excision repair, DNA incision	DNA-repair
GO:0016055	Wnt signaling pathway	signalling
GO:0030182	neuron differentiation	neuron
GO:0045165	cell fate commitment	differentiation
GO:0060070	canonical Wnt signaling pathway	signalling
GO:0071300	cellular response to retinoic acid	cellular-response
GO:0010628	positive regulation of gene expression	transcription
GO:0000902	cell morphogenesis	morphogenesis
GO:1904954	canonical Wnt signaling pathway involved in midbrain dopaminergic neuron differentiation	neuron
GO:0072089	stem cell proliferation	cell-division
GO:0061180	mammary gland epithelium development	glands
GO:0050767	regulation of neurogenesis	brain
GO:0044338	canonical Wnt signaling pathway involved in mesenchymal stem cell differentiation	mesoderm
GO:0044339	canonical Wnt signaling pathway involved in osteoblast differentiation	osteo-bone
GO:0060174	limb bud formation	limb
GO:1905474	canonical Wnt signaling pathway involved in stem cell proliferation	cell-division
GO:0060271	cilium assembly	migration
GO:0060294	cilium movement involved in cell motility	migration
GO:0007166	cell surface receptor signaling pathway	signalling
GO:0043547	positive regulation of GTPase activity	brain
GO:0051056	regulation of small GTPase mediated signal transduction	brain
GO:0006910	phagocytosis, recognition	cytosis-osome-vesicle
GO:0006911	phagocytosis, engulfment	cytosis-osome-vesicle
GO:0006958	complement activation, classical pathway	metabolic-biosynthesis
GO:0042742	defense response to bacterium	immune
GO:0050853	B cell receptor signaling pathway	lymphoid
GO:0050871	positive regulation of B cell activation	lymphoid
GO:0051262	protein tetramerization	protein-processing
GO:0007216	G protein-coupled glutamate receptor signaling pathway	neurotransmitters
GO:0071482	cellular response to light stimulus	eye
GO:0098655	cation transmembrane transport	transport
GO:0010216	maintenance of DNA methylation	methylation
GO:2000653	regulation of genetic imprinting	methylation
GO:0006955	immune response	immune
GO:0019882	antigen processing and presentation	immune
GO:0006562	proline catabolic process	catabolic
GO:2000727	positive regulation of cardiac muscle cell differentiation	muscle
GO:0030514	negative regulation of BMP signaling pathway	signalling
GO:0090090	negative regulation of canonical Wnt signaling pathway	signalling
GO:0033689	negative regulation of osteoblast proliferation	osteo-bone
GO:0060394	negative regulation of pathway-restricted SMAD protein phosphorylation	phosphorylation
GO:0007171	activation of transmembrane receptor protein tyrosine kinase activity	kinase
GO:0010717	regulation of epithelial to mesenchymal transition	differentiation
GO:0051973	positive regulation of telomerase activity	telomere
GO:0002042	cell migration involved in sprouting angiogenesis	blood-vessel
GO:0030199	collagen fibril organization	ecm
GO:0003257	positive regulation of transcription from RNA polymerase II promoter involved in myocardial precursor cell differentiation	transcription
GO:0002092	positive regulation of receptor internalization	signalling
GO:0030502	negative regulation of bone mineralization	osteo-bone
GO:0032331	negative regulation of chondrocyte differentiation	osteo-bone
GO:0045668	negative regulation of osteoblast differentiation	osteo-bone
GO:0046851	negative regulation of bone remodeling	osteo-bone
GO:0048263	determination of dorsal identity	polarity-axis
GO:0060173	limb development	limb
GO:0090027	negative regulation of monocyte chemotaxis	monocyte
GO:0090291	negative regulation of osteoclast proliferation	osteo-bone
GO:1900086	positive regulation of peptidyl-tyrosine autophosphorylation	peptide
GO:1900155	negative regulation of bone trabecula formation	osteo-bone
GO:1900158	negative regulation of bone mineralization involved in bone maturation	osteo-bone
GO:2000273	positive regulation of signaling receptor activity	signalling
GO:0006836	neurotransmitter transport	neurotransmitters
GO:0021987	cerebral cortex development	brain
GO:0060397	growth hormone receptor signaling pathway via JAK-STAT	growth-regulation
GO:0006952	defense response	immune
GO:0042127	regulation of cell population proliferation	cell-division
GO:0007259	receptor signaling pathway via JAK-STAT	signalling
GO:0032355	response to estradiol	cellular-response
GO:0032870	cellular response to hormone stimulus	cellular-response
GO:0038111	interleukin-7-mediated signaling pathway	immune
GO:0071363	cellular response to growth factor stimulus	cellular-response
GO:0071364	cellular response to epidermal growth factor stimulus	cellular-response
GO:0045648	positive regulation of erythrocyte differentiation	red-blood
GO:0040014	regulation of multicellular organism growth	multicellular
GO:0038110	interleukin-2-mediated signaling pathway	immune
GO:0043434	response to peptide hormone	cellular-response
GO:0019530	taurine metabolic process	metabolic-biosynthesis
GO:0035723	interleukin-15-mediated signaling pathway	immune
GO:0038113	interleukin-9-mediated signaling pathway	immune
GO:0001553	luteinization	metabolic-biosynthesis
GO:0001779	natural killer cell differentiation	lymphoid
GO:0007548	sex differentiation	reproduction
GO:0007565	female pregnancy	reproduction
GO:0019218	regulation of steroid metabolic process	metabolic-biosynthesis
GO:0019915	lipid storage	lipid
GO:0030155	regulation of cell adhesion	cell-adhesion
GO:0030856	regulation of epithelial cell differentiation	differentiation
GO:0032819	positive regulation of natural killer cell proliferation	lymphoid
GO:0032825	positive regulation of natural killer cell differentiation	lymphoid
GO:0033077	T cell differentiation in thymus	lymphoid
GO:0040018	positive regulation of multicellular organism growth	multicellular
GO:0042104	positive regulation of activated T cell proliferation	lymphoid
GO:0042448	progesterone metabolic process	metabolic-biosynthesis
GO:0043029	T cell homeostasis	homeostasis
GO:0045086	positive regulation of interleukin-2 biosynthetic process	immune
GO:0045579	positive regulation of B cell differentiation	lymphoid
GO:0045588	positive regulation of gamma-delta T cell differentiation	lymphoid
GO:0045621	positive regulation of lymphocyte differentiation	lymphoid
GO:0045647	negative regulation of erythrocyte differentiation	red-blood
GO:0045931	positive regulation of mitotic cell cycle	cell-division
GO:0045954	positive regulation of natural killer cell mediated cytotoxicity	lymphoid
GO:0046543	development of secondary female sexual characteristics	reproduction
GO:0046544	development of secondary male sexual characteristics	reproduction
GO:0048541	Peyer's patch development	eye
GO:0050729	positive regulation of inflammatory response	myeloid
GO:0070669	response to interleukin-2	immune
GO:0070670	response to interleukin-4	immune
GO:0070672	response to interleukin-15	immune
GO:0097531	mast cell migration	lymphoid
GO:0048511	rhythmic process	circadian-rhythm
GO:0045892	negative regulation of transcription, DNA-templated	transcription
GO:0042754	negative regulation of circadian rhythm	circadian-rhythm
GO:0007018	microtubule-based movement	cytoskeleton
GO:0045880	positive regulation of smoothened signaling pathway	growth-regulation
GO:0045879	negative regulation of smoothened signaling pathway	growth-regulation
GO:0009653	anatomical structure morphogenesis	morphogenesis
GO:0051898	negative regulation of protein kinase B signaling	kinase
GO:0042771	intrinsic apoptotic signaling pathway in response to DNA damage by p53 class mediator	DNA-repair
GO:0016567	protein ubiquitination	protein-processing
GO:0006511	ubiquitin-dependent protein catabolic process	catabolic
GO:0070936	protein K48-linked ubiquitination	protein-processing
GO:0030433	ubiquitin-dependent ERAD pathway	protein-processing
GO:0044257	cellular protein catabolic process	catabolic
GO:1904380	endoplasmic reticulum mannose trimming	protein-processing
GO:0070534	protein K63-linked ubiquitination	protein-processing
GO:0071712	ER-associated misfolded protein catabolic process	catabolic
GO:0036503	ERAD pathway	protein-processing
GO:0034553	mitochondrial respiratory chain complex II assembly	mitochondrion
GO:0045333	cellular respiration	lung
GO:0046330	positive regulation of JNK cascade	MAPK
GO:0001934	positive regulation of protein phosphorylation	phosphorylation
GO:0090263	positive regulation of canonical Wnt signaling pathway	signalling
GO:0033138	positive regulation of peptidyl-serine phosphorylation	peptide
GO:1904886	beta-catenin destruction complex disassembly	growth-regulation
GO:0031398	positive regulation of protein ubiquitination	protein-processing
GO:0010800	positive regulation of peptidyl-threonine phosphorylation	peptide
GO:0030111	regulation of Wnt signaling pathway	signalling
GO:0032147	activation of protein kinase activity	kinase
GO:0033146	regulation of intracellular estrogen receptor signaling pathway	signalling
GO:0034622	cellular protein-containing complex assembly	protein-processing
GO:0045732	positive regulation of protein catabolic process	catabolic
GO:0051443	positive regulation of ubiquitin-protein transferase activity	protein-processing
GO:1904885	beta-catenin destruction complex assembly	growth-regulation
GO:2000060	positive regulation of ubiquitin-dependent protein catabolic process	catabolic
GO:0030154	cell differentiation	differentiation
GO:0006260	DNA replication	replication
GO:0010212	response to ionizing radiation	cellular-response
GO:0033314	mitotic DNA replication checkpoint	cell-division
GO:0007093	mitotic cell cycle checkpoint	cell-division
GO:0030174	regulation of DNA-dependent DNA replication initiation	replication
GO:0000122	negative regulation of transcription by RNA polymerase II	transcription
GO:0007017	microtubule-based process	cytoskeleton
GO:0000226	microtubule cytoskeleton organization	cytoskeleton
GO:0000278	mitotic cell cycle	cell-division
GO:0000086	G2/M transition of mitotic cell cycle	cell-division
GO:0010389	regulation of G2/M transition of mitotic cell cycle	cell-division
GO:0097711	ciliary basal body-plasma membrane docking	cytoskeleton
GO:0009987	cellular process	metabolic-biosynthesis
GO:0030705	cytoskeleton-dependent intracellular transport	cytoskeleton
GO:0042267	natural killer cell mediated cytotoxicity	lymphoid
GO:0007010	cytoskeleton organization	cytoskeleton
GO:0008150	biological_process	biological_process
GO:0006508	proteolysis	protein-processing
GO:0006349	regulation of gene expression by genetic imprinting	methylation
GO:0043045	DNA methylation involved in embryo development	methylation
GO:1903508	positive regulation of nucleic acid-templated transcription	transcription
GO:0042981	regulation of apoptotic process	cell-death
GO:0016032	viral process	immune
GO:0008625	extrinsic apoptotic signaling pathway via death domain receptors	cell-death
GO:0030521	androgen receptor signaling pathway	neurotransmitters
GO:1903936	cellular response to sodium arsenite	cellular-response
GO:0034605	cellular response to heat	environment-sensing
GO:0007257	activation of JUN kinase activity	kinase
GO:0071276	cellular response to cadmium ion	environment-sensing
GO:1901216	positive regulation of neuron death	neuron
GO:0071280	cellular response to copper ion	environment-sensing
GO:0031396	regulation of protein ubiquitination	protein-processing
GO:0034620	cellular response to unfolded protein	cellular-response
GO:0072738	cellular response to diamide	cellular-response
GO:0045860	positive regulation of protein kinase activity	kinase
GO:0046597	negative regulation of viral entry into host cell	immune
GO:0051091	positive regulation of DNA-binding transcription factor activity	transcription
GO:0060333	interferon-gamma-mediated signaling pathway	immune
GO:0032897	negative regulation of viral transcription	immune
GO:1902186	regulation of viral release from host cell	immune
GO:0006351	transcription, DNA-templated	transcription
GO:0000079	regulation of cyclin-dependent protein serine/threonine kinase activity	kinase
GO:0006368	transcription elongation from RNA polymerase II promoter	transcription
GO:0006370	7-methylguanosine mRNA capping	rna-processing
GO:0006367	transcription initiation from RNA polymerase II promoter	transcription
GO:0000082	G1/S transition of mitotic cell cycle	cell-division
GO:0006361	transcription initiation from RNA polymerase I promoter	transcription
GO:0006362	transcription elongation from RNA polymerase I promoter	transcription
GO:0006363	termination of RNA polymerase I transcription	transcription
GO:0006283	transcription-coupled nucleotide-excision repair	DNA-repair
GO:0050821	protein stabilization	protein-processing
GO:0006294	nucleotide-excision repair, preincision complex assembly	DNA-repair
GO:0070816	phosphorylation of RNA polymerase II C-terminal domain	transcription
GO:0035065	regulation of histone acetylation	histone-chromatin
GO:0001932	regulation of protein phosphorylation	phosphorylation
GO:0031063	regulation of histone deacetylation	histone-chromatin
GO:0031647	regulation of protein stability	protein-processing
GO:0090043	regulation of tubulin deacetylation	cytoskeleton
GO:0000381	regulation of alternative mRNA splicing, via spliceosome	rna-processing
GO:0006376	mRNA splice site selection	rna-processing
GO:0051092	positive regulation of NF-kappaB transcription factor activity	transcription
GO:0007500	mesodermal cell fate determination	mesoderm
GO:0032481	positive regulation of type I interferon production	immune
GO:1902187	negative regulation of viral release from host cell	immune
GO:1900246	positive regulation of RIG-I signaling pathway	signalling
GO:1901253	negative regulation of intracellular transport of viral material	immune
GO:1901223	negative regulation of NIK/NF-kappaB signaling	signalling
GO:0042177	negative regulation of protein catabolic process	catabolic
GO:0045116	protein neddylation	protein-processing
GO:1900181	negative regulation of protein localization to nucleus	protein-processing
GO:0046718	viral entry into host cell	immune
GO:0030449	regulation of complement activation	replication
GO:0007338	single fertilization	reproduction
GO:0042102	positive regulation of T cell proliferation	lymphoid
GO:0002456	T cell mediated immunity	lymphoid
GO:0010629	negative regulation of gene expression	transcription
GO:0071636	positive regulation of transforming growth factor beta production	immune
GO:0008593	regulation of Notch signaling pathway	notch
GO:0045591	positive regulation of regulatory T cell differentiation	lymphoid
GO:0032733	positive regulation of interleukin-10 production	immune
GO:0032613	interleukin-10 production	immune
GO:0035581	sequestering of extracellular ligand from receptor	signalling
GO:0043382	positive regulation of memory T cell differentiation	lymphoid
GO:0006269	DNA replication, synthesis of RNA primer	replication
GO:0006270	DNA replication initiation	replication
GO:0032201	telomere maintenance via semi-conservative replication	telomere
GO:0005975	carbohydrate metabolic process	metabolic-biosynthesis
GO:0006013	mannose metabolic process	metabolic-biosynthesis
GO:0008152	metabolic process	metabolic-biosynthesis
GO:0006486	protein glycosylation	protein-processing
GO:0006517	protein deglycosylation	protein-processing
GO:0006491	N-glycan processing	metabolic-biosynthesis
GO:0030277	maintenance of gastrointestinal epithelium	gut
GO:0010906	regulation of glucose metabolic process	metabolic-biosynthesis
GO:0008285	negative regulation of cell population proliferation	cell-division
GO:0043569	negative regulation of insulin-like growth factor receptor signaling pathway	pancreas
GO:0010719	negative regulation of epithelial to mesenchymal transition	growth-regulation
GO:0051216	cartilage development	osteo-bone
GO:0001501	skeletal system development	osteo-bone
GO:0060037	pharyngeal system development	lung
GO:0060395	SMAD protein signal transduction	protein-processing
GO:0003272	endocardial cushion formation	heart
GO:0003344	pericardium morphogenesis	heart
GO:0007389	pattern specification process	morphogenesis
GO:0021502	neural fold elevation formation	neural-crest
GO:0030539	male genitalia development	reproduction
GO:0030902	hindbrain development	brain
GO:0043583	ear development	auditory
GO:0048738	cardiac muscle tissue development	muscle
GO:0060411	cardiac septum morphogenesis	heart
GO:0060710	chorio-allantoic fusion	heart
GO:0061384	heart trabecula morphogenesis	heart
GO:0097065	anterior head development	heart
GO:1905069	allantois development	gut
GO:0001503	ossification	osteo-bone
GO:0030509	BMP signaling pathway	signalling
GO:0010862	positive regulation of pathway-restricted SMAD protein phosphorylation	phosphorylation
GO:1902042	negative regulation of extrinsic apoptotic signaling pathway via death domain receptors	cell-death
GO:1900006	positive regulation of dendrite development	brain
GO:0071676	negative regulation of mononuclear cell migration	migration
GO:0050679	positive regulation of epithelial cell proliferation	cell-division
GO:0010894	negative regulation of steroid biosynthetic process	metabolic-biosynthesis
GO:0032348	negative regulation of aldosterone biosynthetic process	metabolic-biosynthesis
GO:2000065	negative regulation of cortisol biosynthetic process	metabolic-biosynthesis
GO:0003323	type B pancreatic cell development	pancreas
GO:0032483	regulation of Rab protein signal transduction	protein-processing
GO:0002181	cytoplasmic translation	translation
GO:0007566	embryo implantation	blastocyst
GO:0018108	peptidyl-tyrosine phosphorylation	peptide
GO:0071902	positive regulation of protein serine/threonine kinase activity	kinase
GO:0000165	MAPK cascade	MAPK
GO:0007346	regulation of mitotic cell cycle	cell-division
GO:0023014	signal transduction by protein phosphorylation	phosphorylation
GO:0031098	stress-activated protein kinase signaling cascade	growth-regulation
GO:0000187	activation of MAPK activity	MAPK
GO:0032872	regulation of stress-activated MAPK cascade	MAPK
GO:2000641	regulation of early endosome to late endosome transport	cytosis-osome-vesicle
GO:1903800	positive regulation of production of miRNAs involved in gene silencing by miRNA	transcription
GO:0070371	ERK1 and ERK2 cascade	MAPK
GO:0090170	regulation of Golgi inheritance	transport
GO:0036289	peptidyl-serine autophosphorylation	peptide
GO:0051562	negative regulation of mitochondrial calcium ion concentration	mitochondrion
GO:0070098	chemokine-mediated signaling pathway	immune
GO:0060455	negative regulation of gastric acid secretion	gut
GO:0043044	ATP-dependent chromatin remodeling	histone-chromatin
GO:0045727	positive regulation of translation	translation
GO:0045793	positive regulation of cell size	cell-size
GO:0032469	endoplasmic reticulum calcium ion homeostasis	protein-processing
GO:0006816	calcium ion transport	transport
GO:0070588	calcium ion transmembrane transport	transport
GO:0006983	ER overload response	environment-sensing
GO:0006879	cellular iron ion homeostasis	homeostasis
GO:0045669	positive regulation of osteoblast differentiation	osteo-bone
GO:0045780	positive regulation of bone resorption	osteo-bone
GO:0045851	pH reduction	environment-sensing
GO:0045921	positive regulation of exocytosis	cytosis-osome-vesicle
GO:0051656	establishment of organelle localization	cytoskeleton
GO:0070374	positive regulation of ERK1 and ERK2 cascade	MAPK
GO:2001206	positive regulation of osteoclast development	osteo-bone
GO:0008286	insulin receptor signaling pathway	signalling
GO:0033572	transferrin transport	transport
GO:0036295	cellular response to increased oxygen levels	cellular-response
GO:0030641	regulation of cellular pH	environment-sensing
GO:0007155	cell adhesion	cell-adhesion
GO:0007417	central nervous system development	spine
GO:0030198	extracellular matrix organization	ecm
GO:0018146	keratan sulfate biosynthetic process	metabolic-biosynthesis
GO:0042340	keratan sulfate catabolic process	catabolic
GO:0001502	cartilage condensation	osteo-bone
GO:0002063	chondrocyte development	osteo-bone
GO:0007507	heart development	heart
GO:0030166	proteoglycan biosynthetic process	ecm
GO:0018095	protein polyglutamylation	protein-processing
GO:0007283	spermatogenesis	reproduction
GO:2000403	positive regulation of lymphocyte migration	lymphoid
GO:0007160	cell-matrix adhesion	ecm
GO:0043113	receptor clustering	signalling
GO:0034113	heterotypic cell-cell adhesion	cell-adhesion
GO:0050901	leukocyte tethering or rolling	lymphoid
GO:0002687	positive regulation of leukocyte migration	lymphoid
GO:0032091	negative regulation of protein binding	protein-processing
GO:1901799	negative regulation of proteasomal protein catabolic process	catabolic
GO:0030203	glycosaminoglycan metabolic process	metabolic-biosynthesis
GO:0050650	chondroitin sulfate proteoglycan biosynthetic process	metabolic-biosynthesis
GO:0007520	myoblast fusion	muscle
GO:0007009	plasma membrane organization	ecm
GO:0061025	membrane fusion	ecm
GO:0006936	muscle contraction	muscle
GO:0001778	plasma membrane repair	DNA-repair
GO:0033292	T-tubule organization	ecm
GO:0008015	blood circulation	blood-vessel
GO:0006071	glycerol metabolic process	metabolic-biosynthesis
GO:0030947	regulation of vascular endothelial growth factor receptor signaling pathway	blood-vessel
GO:0048747	muscle fiber development	muscle
GO:0044206	UMP salvage	metabolic-biosynthesis
GO:0043097	pyrimidine nucleoside salvage	metabolic-biosynthesis
GO:0044211	CTP salvage	metabolic-biosynthesis
GO:0009165	nucleotide biosynthetic process	metabolic-biosynthesis
GO:2000369	regulation of clathrin-dependent endocytosis	cytosis-osome-vesicle
GO:0007249	I-kappaB kinase/NF-kappaB signaling	signalling
GO:0032720	negative regulation of tumor necrosis factor production	cell-death
GO:0042994	cytoplasmic sequestering of transcription factor	transcription
GO:0031665	negative regulation of lipopolysaccharide-mediated signaling pathway	signalling
GO:0034122	negative regulation of toll-like receptor signaling pathway	immune
GO:0010039	response to iron ion	cellular-response
GO:0035902	response to immobilization stress	cellular-response
GO:0007399	nervous system development	spine
GO:0007268	chemical synaptic transmission	synapse
GO:0007271	synaptic transmission, cholinergic	synapse
GO:0042391	regulation of membrane potential	synapse
GO:0050877	nervous system process	spine
GO:0007274	neuromuscular synaptic transmission	muscle
GO:0006940	regulation of smooth muscle contraction	muscle
GO:0007626	locomotory behavior	behavior
GO:0048814	regulation of dendrite morphogenesis	brain
GO:0035095	behavioral response to nicotine	behavior
GO:0060084	synaptic transmission involved in micturition	synapse
GO:0095500	acetylcholine receptor signaling pathway	neurotransmitters
GO:1905144	response to acetylcholine	neurotransmitters
GO:0014056	regulation of acetylcholine secretion, neurotransmission	neurotransmitters
GO:0060079	excitatory postsynaptic potential	synapse
GO:0030036	actin cytoskeleton organization	cytoskeleton
GO:0001525	angiogenesis	blood-vessel
GO:0016525	negative regulation of angiogenesis	blood-vessel
GO:0034613	cellular protein localization	protein-processing
GO:0003365	establishment of cell polarity involved in ameboidal cell migration	migration
GO:0001570	vasculogenesis	blood-vessel
GO:0001702	gastrulation with mouth forming second	blastocyst
GO:0006935	chemotaxis	environment-sensing
GO:0040019	positive regulation of embryonic development	blastocyst
GO:0042074	cell migration involved in gastrulation	blastocyst
GO:0043534	blood vessel endothelial cell migration	blood-vessel
GO:0048514	blood vessel morphogenesis	blood-vessel
GO:0006826	iron ion transport	transport
GO:0006880	intracellular sequestering of iron ion	blood-vessel
GO:0051349	positive regulation of lyase activity	metabolic-biosynthesis
GO:1904231	positive regulation of succinate dehydrogenase activity	metabolic-biosynthesis
GO:1904234	positive regulation of aconitate hydratase activity	metabolic-biosynthesis
GO:0006094	gluconeogenesis	metabolic-biosynthesis
GO:0042593	glucose homeostasis	homeostasis
GO:0051156	glucose 6-phosphate metabolic process	metabolic-biosynthesis
GO:0005977	glycogen metabolic process	metabolic-biosynthesis
GO:0005980	glycogen catabolic process	catabolic
GO:0006641	triglyceride metabolic process	metabolic-biosynthesis
GO:0008202	steroid metabolic process	metabolic-biosynthesis
GO:0009743	response to carbohydrate	cellular-response
GO:0010468	regulation of gene expression	transcription
GO:0015760	glucose-6-phosphate transport	transport
GO:0032094	response to food	cellular-response
GO:0032868	response to insulin	pancreas
GO:0032869	cellular response to insulin stimulus	cellular-response
GO:0035264	multicellular organism growth	multicellular
GO:0042632	cholesterol homeostasis	homeostasis
GO:0046415	urate metabolic process	metabolic-biosynthesis
GO:0046838	phosphorylated carbohydrate dephosphorylation	phosphorylation
GO:0055088	lipid homeostasis	homeostasis
GO:1904638	response to resveratrol	cellular-response
GO:0033209	tumor necrosis factor-mediated signaling pathway	cell-death
GO:0007267	cell-cell signaling	signalling
GO:0060078	regulation of postsynaptic membrane potential	synapse
GO:2000300	regulation of synaptic vesicle exocytosis	cytosis-osome-vesicle
GO:0070527	platelet aggregation	red-blood
GO:0045214	sarcomere organization	muscle
GO:0060537	muscle tissue development	muscle
GO:0035335	peptidyl-tyrosine dephosphorylation	peptide
GO:0006470	protein dephosphorylation	phosphorylation
GO:0016311	dephosphorylation	phosphorylation
GO:0043410	positive regulation of MAPK cascade	MAPK
GO:1903979	negative regulation of microglial cell activation	microglia
GO:0032760	positive regulation of tumor necrosis factor production	cell-death
GO:0051607	defense response to virus	immune
GO:0001960	negative regulation of cytokine-mediated signaling pathway	immune
GO:0051726	regulation of cell cycle	cell-cycle
GO:0030217	T cell differentiation	lymphoid
GO:0006469	negative regulation of protein kinase activity	kinase
GO:0006933	negative regulation of cell adhesion involved in substrate-bound cell migration	cell-adhesion
GO:0051209	release of sequestered calcium ion into cytosol	calcium
GO:0042100	B cell proliferation	lymphoid
GO:0002244	hematopoietic progenitor cell differentiation	hematopoiesis
GO:0050731	positive regulation of peptidyl-tyrosine phosphorylation	peptide
GO:0030890	positive regulation of B cell proliferation	lymphoid
GO:0035584	calcium-mediated signaling using intracellular calcium source	calcium
GO:0048539	bone marrow development	myeloid
GO:0001915	negative regulation of T cell mediated cytotoxicity	lymphoid
GO:0002378	immunoglobulin biosynthetic process	immune
GO:0030183	B cell differentiation	lymphoid
GO:0031668	cellular response to extracellular stimulus	cellular-response
GO:0032677	regulation of interleukin-8 production	immune
GO:0042110	T cell activation	lymphoid
GO:0044770	cell cycle phase transition	cell-cycle
GO:0044855	plasma membrane raft distribution	immune
GO:0045085	negative regulation of interleukin-2 biosynthetic process	immune
GO:0046425	regulation of receptor signaling pathway via JAK-STAT	immune
GO:0048864	stem cell development	cell-division
GO:0050764	regulation of phagocytosis	cytosis-osome-vesicle
GO:0050857	positive regulation of antigen receptor-mediated signaling pathway	ecm
GO:0061097	regulation of protein tyrosine kinase activity	kinase
GO:0061099	negative regulation of protein tyrosine kinase activity	kinase
GO:0070373	negative regulation of ERK1 and ERK2 cascade	MAPK
GO:1903615	positive regulation of protein tyrosine phosphatase activity	protein-processing
GO:1904155	DN2 thymocyte differentiation	lymphoid
GO:1905451	positive regulation of Fc-gamma receptor signaling pathway involved in phagocytosis	cytosis-osome-vesicle
GO:2000473	positive regulation of hematopoietic stem cell migration	hematopoiesis
GO:2000648	positive regulation of stem cell proliferation	cell-division
GO:0001916	positive regulation of T cell mediated cytotoxicity	lymphoid
GO:0002711	positive regulation of T cell mediated immunity	lymphoid
GO:0002923	regulation of humoral immune response mediated by circulating immunoglobulin	immune
GO:0002925	positive regulation of humoral immune response mediated by circulating immunoglobulin	immune
GO:0007159	leukocyte cell-cell adhesion	cell-adhesion
GO:0010332	response to gamma radiation	cellular-response
GO:0031953	negative regulation of protein autophosphorylation	phosphorylation
GO:0042098	T cell proliferation	lymphoid
GO:0045059	positive thymic T cell selection	lymphoid
GO:0045060	negative thymic T cell selection	lymphoid
GO:0045582	positive regulation of T cell differentiation	lymphoid
GO:0046641	positive regulation of alpha-beta T cell proliferation	lymphoid
GO:0048304	positive regulation of isotype switching to IgG isotypes	immune
GO:0050732	negative regulation of peptidyl-tyrosine phosphorylation	peptide
GO:2001236	regulation of extrinsic apoptotic signaling pathway	cell-death
GO:2001238	positive regulation of extrinsic apoptotic signaling pathway	cell-death
GO:0000413	protein peptidyl-prolyl isomerization	peptide
GO:0061077	chaperone-mediated protein folding	protein-processing
GO:0006457	protein folding	protein-processing
GO:0009617	response to bacterium	immune
GO:0043525	positive regulation of neuron apoptotic process	neuron
GO:0045599	negative regulation of fat cell differentiation	lipid
GO:0001774	microglial cell activation	microglia
GO:1901224	positive regulation of NIK/NF-kappaB signaling	immune
GO:0051897	positive regulation of protein kinase B signaling	immune
GO:1900017	positive regulation of cytokine production involved in inflammatory response	myeloid
GO:0060252	positive regulation of glial cell proliferation	brain
GO:0150078	positive regulation of neuroinflammatory response	brain
GO:0051966	regulation of synaptic transmission, glutamatergic	neurotransmitters
GO:1900222	negative regulation of amyloid-beta clearance	brain
GO:1902004	positive regulation of amyloid-beta formation	brain
GO:1904996	positive regulation of leukocyte adhesion to vascular endothelial cell	blood-vessel
GO:1904999	positive regulation of leukocyte adhesion to arterial endothelial cell	blood-vessel
GO:2000778	positive regulation of interleukin-6 secretion	immune
GO:0045598	regulation of fat cell differentiation	lymphoid
GO:2001234	negative regulation of apoptotic signaling pathway	cell-death
GO:0031334	positive regulation of protein-containing complex assembly	protein-processing
GO:0032715	negative regulation of interleukin-6 production	immune
GO:0032722	positive regulation of chemokine production	immune
GO:0032755	positive regulation of interleukin-6 production	immune
GO:2000484	positive regulation of interleukin-8 secretion	immune
GO:0045785	positive regulation of cell adhesion	cell-adhesion
GO:0097191	extrinsic apoptotic signaling pathway	cell-death
GO:0043123	positive regulation of I-kappaB kinase/NF-kappaB signaling	signalling
GO:0006919	activation of cysteine-type endopeptidase activity involved in apoptotic process	cell-death
GO:0072659	protein localization to plasma membrane	ecm
GO:2001240	negative regulation of extrinsic apoptotic signaling pathway in absence of ligand	cell-death
GO:0043406	positive regulation of MAP kinase activity	MAPK
GO:0045672	positive regulation of osteoclast differentiation	osteo-bone
GO:0010803	regulation of tumor necrosis factor-mediated signaling pathway	cell-death
GO:0030866	cortical actin cytoskeleton organization	cytoskeleton
GO:0035509	negative regulation of myosin-light-chain-phosphatase activity	muscle
GO:1903140	regulation of establishment of endothelial barrier	blood-vessel
GO:1903347	negative regulation of bicellular tight junction assembly	ecm
GO:0001819	positive regulation of cytokine production	immune
GO:0097527	necroptotic signaling pathway	cell-death
GO:0043507	positive regulation of JUN kinase activity	kinase
GO:0045429	positive regulation of nitric oxide biosynthetic process	metabolic-biosynthesis
GO:0045416	positive regulation of interleukin-8 biosynthetic process	immune
GO:0051044	positive regulation of membrane protein ectodomain proteolysis	protein-processing
GO:0045410	positive regulation of interleukin-6 biosynthetic process	immune
GO:0050725	positive regulation of interleukin-1 beta biosynthetic process	immune
GO:0050995	negative regulation of lipid catabolic process	catabolic
GO:2000304	positive regulation of ceramide biosynthetic process	metabolic-biosynthesis
GO:0031663	lipopolysaccharide-mediated signaling pathway	lipid
GO:0048661	positive regulation of smooth muscle cell proliferation	muscle
GO:0050890	cognition	behavior
GO:1901647	positive regulation of synoviocyte proliferation	heart
GO:1903721	positive regulation of I-kappaB phosphorylation	phosphorylation
GO:1903799	negative regulation of production of miRNAs involved in gene silencing by miRNA	transcription
GO:0000185	activation of MAPKKK activity	MAPK
GO:0002439	chronic inflammatory response to antigenic stimulus	myeloid
GO:0002740	negative regulation of cytokine secretion involved in immune response	immune
GO:0009615	response to virus	immune
GO:0009651	response to salt stress	stress-response
GO:0010888	negative regulation of lipid storage	lipid
GO:0014068	positive regulation of phosphatidylinositol 3-kinase signaling	lipid
GO:0030730	sequestering of triglyceride	lipid
GO:0031622	positive regulation of fever generation	immune
GO:0032757	positive regulation of interleukin-8 production	immune
GO:0032800	receptor biosynthetic process	metabolic-biosynthesis
GO:0034116	positive regulation of heterotypic cell-cell adhesion	cell-adhesion
GO:0042531	positive regulation of tyrosine phosphorylation of STAT protein	phosphorylation
GO:0043068	positive regulation of programmed cell death	cell-death
GO:0043122	regulation of I-kappaB kinase/NF-kappaB signaling	signalling
GO:0043242	negative regulation of protein-containing complex disassembly	cytoskeleton
GO:0043243	positive regulation of protein-containing complex disassembly	cytoskeleton
GO:0043491	protein kinase B signaling	kinase
GO:0045071	negative regulation of viral genome replication	immune
GO:0045080	positive regulation of chemokine biosynthetic process	metabolic-biosynthesis
GO:0046427	positive regulation of receptor signaling pathway via JAK-STAT	signalling
GO:0048143	astrocyte activation	brain
GO:0048566	embryonic digestive tract development	gut
GO:0050715	positive regulation of cytokine secretion	immune
GO:0050754	positive regulation of fractalkine biosynthetic process	metabolic-biosynthesis
GO:0050766	positive regulation of phagocytosis	cytosis-osome-vesicle
GO:0050768	negative regulation of neurogenesis	brain
GO:0050796	regulation of insulin secretion	pancreas
GO:0050806	positive regulation of synaptic transmission	synapse
GO:0050807	regulation of synapse organization	synapse
GO:0051000	positive regulation of nitric-oxide synthase activity	metabolic-biosynthesis
GO:0051173	positive regulation of nitrogen compound metabolic process	metabolic-biosynthesis
GO:0051222	positive regulation of protein transport	transport
GO:0051384	response to glucocorticoid	neurotransmitters
GO:0060557	positive regulation of vitamin D biosynthetic process	metabolic-biosynthesis
GO:0060559	positive regulation of calcidiol 1-monooxygenase activity	metabolic-biosynthesis
GO:0061048	negative regulation of branching involved in lung morphogenesis	lung
GO:0070886	positive regulation of calcineurin-NFAT signaling cascade	metabolic-biosynthesis
GO:0071316	cellular response to nicotine	neurotransmitters
GO:0071407	cellular response to organic cyclic compound	cellular-response
GO:0071550	death-inducing signaling complex assembly	cell-death
GO:0071677	positive regulation of mononuclear cell migration	migration
GO:0071803	positive regulation of podosome assembly	ecm
GO:0090197	positive regulation of chemokine secretion	immune
GO:1901671	positive regulation of superoxide dismutase activity	metabolic-biosynthesis
GO:1903078	positive regulation of protein localization to plasma membrane	protein-processing
GO:2000010	positive regulation of protein localization to cell surface	protein-processing
GO:2000334	positive regulation of blood microparticle formation	blood-vessel
GO:2000343	positive regulation of chemokine (C-X-C motif) ligand 2 production	signalling
GO:2000351	regulation of endothelial cell apoptotic process	blood-vessel
GO:0035458	cellular response to interferon-beta	immune
GO:0000209	protein polyubiquitination	protein-processing
GO:1904153	negative regulation of retrograde protein transport, ER to cytosol	transport
GO:0006306	DNA methylation	methylation
GO:0032259	methylation	methylation
GO:0045814	negative regulation of gene expression, epigenetic	methylation
GO:0090116	C-5 methylation of cytosine	methylation
GO:0006346	methylation-dependent chromatin silencing	histone-chromatin
GO:0010288	response to lead ion	cellular-response
GO:0010942	positive regulation of cell death	cell-death
GO:0031667	response to nutrient levels	cellular-response
GO:0032776	DNA methylation on cytosine	methylation
GO:0033189	response to vitamin A	cellular-response
GO:0043046	DNA methylation involved in gamete generation	reproduction
GO:0071230	cellular response to amino acid stimulus	cellular-response
GO:0071361	cellular response to ethanol	cellular-response
GO:0071456	cellular response to hypoxia	cellular-response
GO:0097284	hepatocyte apoptotic process	liver
GO:0030968	endoplasmic reticulum unfolded protein response	protein-processing
GO:0006986	response to unfolded protein	protein-processing
GO:1990440	positive regulation of transcription from RNA polymerase II promoter in response to endoplasmic reticulum stress	protein-processing
GO:0002675	positive regulation of acute inflammatory response	myeloid
GO:0007409	axonogenesis	neuron
GO:0006914	autophagy	cell-death
GO:0010508	positive regulation of autophagy	cell-death
GO:0075044	positive regulation by symbiont of host autophagy	immune
GO:0010506	regulation of autophagy	cell-death
GO:0000045	autophagosome assembly	cytosis-osome-vesicle
GO:0008104	protein localization	protein-processing
GO:0046777	protein autophosphorylation	phosphorylation
GO:0031175	neuron projection development	neuron
GO:0018105	peptidyl-serine phosphorylation	peptide
GO:0016241	regulation of macroautophagy	cell-death
GO:0042594	response to starvation	cellular-response
GO:0016236	macroautophagy	cell-death
GO:0018107	peptidyl-threonine phosphorylation	peptide
GO:0031102	neuron projection regeneration	neuron
GO:0031333	negative regulation of protein-containing complex assembly	protein-processing
GO:0031669	cellular response to nutrient levels	cellular-response
GO:0048675	axon extension	neuron
GO:2000786	positive regulation of autophagosome assembly	cytosis-osome-vesicle
GO:0043486	histone exchange	histone-chromatin
GO:0035722	interleukin-12-mediated signaling pathway	immune
GO:0038155	interleukin-23-mediated signaling pathway	immune
GO:0070757	interleukin-35-mediated signaling pathway	immune
GO:0038114	interleukin-21-mediated signaling pathway	immune
GO:0017185	peptidyl-lysine hydroxylation	peptide
GO:0001886	endothelial cell morphogenesis	blood-vessel
GO:0006493	protein O-linked glycosylation	protein-processing
GO:0021915	neural tube development	neural-tube
GO:0032963	collagen metabolic process	metabolic-biosynthesis
GO:0042311	vasodilation	blood-vessel
GO:0046947	hydroxylysine biosynthetic process	metabolic-biosynthesis
GO:0048730	epidermis morphogenesis	epidermis
GO:0060425	lung morphogenesis	lung
GO:0070831	basement membrane assembly	ecm
GO:0043433	negative regulation of DNA-binding transcription factor activity	transcription
GO:0043161	proteasome-mediated ubiquitin-dependent protein catabolic process	catabolic
GO:0034765	regulation of ion transmembrane transport	transport
GO:0006858	extracellular transport	transport
GO:0032410	negative regulation of transporter activity	transport
GO:0045746	negative regulation of Notch signaling pathway	notch
GO:0051224	negative regulation of protein transport	transport
GO:0051865	protein autoubiquitination	protein-processing
GO:1901016	regulation of potassium ion transmembrane transporter activity	transport
GO:0000188	inactivation of MAPK activity	MAPK
GO:0043407	negative regulation of MAP kinase activity	MAPK
GO:0015937	coenzyme A biosynthetic process	metabolic-biosynthesis
GO:0009108	coenzyme biosynthetic process	metabolic-biosynthesis
GO:0006479	protein methylation	methylation
GO:0018022	peptidyl-lysine methylation	peptide
GO:0043536	positive regulation of blood vessel endothelial cell migration	blood-vessel
GO:0001938	positive regulation of endothelial cell proliferation	blood-vessel
GO:0038026	reelin-mediated signaling pathway	signalling
GO:0070125	mitochondrial translational elongation	translation
GO:0070126	mitochondrial translational termination	translation
GO:0010507	negative regulation of autophagy	cell-death
GO:0031648	protein destabilization	protein-processing
GO:2000785	regulation of autophagosome assembly	cytosis-osome-vesicle
GO:0007156	homophilic cell adhesion via plasma membrane adhesion molecules	cell-adhesion
GO:0034332	adherens junction organization	ecm
GO:0007157	heterophilic cell-cell adhesion via plasma membrane cell adhesion molecules	cell-adhesion
GO:0007623	circadian rhythm	circadian-rhythm
GO:0010944	negative regulation of transcription by competitive promoter binding	transcription
GO:0045600	positive regulation of fat cell differentiation	lymphoid
GO:0046889	positive regulation of lipid biosynthetic process	metabolic-biosynthesis
GO:0010033	response to organic substance	cellular-response
GO:0007179	transforming growth factor beta receptor signaling pathway	immune
GO:0007613	memory	brain
GO:0008361	regulation of cell size	cell-size
GO:0008542	visual learning	behavior
GO:0014823	response to activity	cellular-response
GO:0021983	pituitary gland development	brain
GO:0030879	mammary gland development	glands
GO:0032916	positive regulation of transforming growth factor beta3 production	immune
GO:0033363	secretory granule organization	transport
GO:0034670	chemotaxis to arachidonic acid	environment-sensing
GO:0035729	cellular response to hepatocyte growth factor stimulus	liver
GO:0036120	cellular response to platelet-derived growth factor stimulus	red-blood
GO:0042752	regulation of circadian rhythm	circadian-rhythm
GO:0045899	positive regulation of RNA polymerase II transcriptional preinitiation complex assembly	transcription
GO:0046887	positive regulation of hormone secretion	secretion
GO:0048145	regulation of fibroblast proliferation	growth-regulation
GO:0055025	positive regulation of cardiac muscle tissue development	muscle
GO:0060251	regulation of glial cell proliferation	brain
GO:0060428	lung epithelium development	lung
GO:0060430	lung saccule development	lung
GO:0060509	type I pneumocyte differentiation	lung
GO:0071294	cellular response to zinc ion	environment-sensing
GO:0071398	cellular response to fatty acid	cellular-response
GO:0071560	cellular response to transforming growth factor beta stimulus	immune
GO:1900273	positive regulation of long-term synaptic potentiation	synapse
GO:1901215	negative regulation of neuron death	neuron
GO:1902065	response to L-glutamate	neurotransmitters
GO:1990090	cellular response to nerve growth factor stimulus	nerve
GO:1990314	cellular response to insulin-like growth factor stimulus	pancreas
GO:1990830	cellular response to leukemia inhibitory factor	hematopoiesis
GO:0007631	feeding behavior	behavior
GO:0019934	cGMP-mediated signaling	signalling
GO:0007200	phospholipase C-activating G protein-coupled receptor signaling pathway	phosphorylation
GO:0007187	G protein-coupled receptor signaling pathway, coupled to cyclic nucleotide second messenger	signalling
GO:0006874	cellular calcium ion homeostasis	homeostasis
GO:0032098	regulation of appetite	growth-regulation
GO:0051482	positive regulation of cytosolic calcium ion concentration involved in phospholipase C-activating G protein-coupled signaling pathway	calcium
GO:0001662	behavioral fear response	behavior
GO:0007210	serotonin receptor signaling pathway	neurotransmitters
GO:0007610	behavior	behavior
GO:0010513	positive regulation of phosphatidylinositol biosynthetic process	metabolic-biosynthesis
GO:0007208	phospholipase C-activating serotonin receptor signaling pathway	neurotransmitters
GO:0031644	regulation of nervous system process	spine
GO:0043397	regulation of corticotropin-releasing hormone secretion	neurotransmitters
GO:0001817	regulation of cytokine production	metabolic-biosynthesis
GO:0006624	vacuolar protein processing	protein-processing
GO:0010952	positive regulation of peptidase activity	protein-processing
GO:0006953	acute-phase response	environment-sensing
GO:0044267	cellular protein metabolic process	metabolic-biosynthesis
GO:0043687	post-translational protein modification	translation
GO:0008360	regulation of cell shape	growth-regulation
GO:0002576	platelet degranulation	red-blood
GO:0033622	integrin activation	ecm
GO:0034446	substrate adhesion-dependent cell spreading	migration
GO:0048146	positive regulation of fibroblast proliferation	ecm
GO:0009611	response to wounding	cellular-response
GO:0070372	regulation of ERK1 and ERK2 cascade	MAPK
GO:0051702	interaction with symbiont	immune
GO:0018149	peptide cross-linking	peptide
GO:0035987	endodermal cell differentiation	blood-vessel
GO:1901166	neural crest cell migration involved in autonomic nervous system development	neural-crest
GO:1904237	positive regulation of substrate-dependent cell migration, cell attachment to substrate	migration
GO:2001202	negative regulation of transforming growth factor-beta secretion	secretion
GO:0007044	cell-substrate junction assembly	ecm
GO:0007161	calcium-independent cell-matrix adhesion	calcium
GO:0042060	wound healing	regeneration-healing
GO:0045773	positive regulation of axon extension	neuron
GO:0007004	telomere maintenance via telomerase	telomere
GO:0032210	regulation of telomere maintenance via telomerase	telomere
GO:0032204	regulation of telomere maintenance	telomere
GO:0006406	mRNA export from nucleus	rna-processing
GO:0035303	regulation of dephosphorylation	phosphorylation
GO:0001568	blood vessel development	blood-vessel
GO:0001649	osteoblast differentiation	osteo-bone
GO:0016202	regulation of striated muscle tissue development	muscle
GO:0017015	regulation of transforming growth factor beta receptor signaling pathway	immune
GO:0018158	protein oxidation	protein-processing
GO:0030282	bone mineralization	osteo-bone
GO:0030324	lung development	lung
GO:0035791	platelet-derived growth factor receptor-beta signaling pathway	red-blood
GO:0035904	aorta development	blood-vessel
GO:0035905	ascending aorta development	blood-vessel
GO:0035906	descending aorta development	blood-vessel
GO:0045652	regulation of megakaryocyte differentiation	red-blood
GO:0046716	muscle cell cellular homeostasis	homeostasis
GO:0048251	elastic fiber assembly	ecm
GO:0048545	response to steroid hormone	cellular-response
GO:0060326	cell chemotaxis	environment-sensing
GO:0061448	connective tissue development	ecm
GO:0071310	cellular response to organic substance	cellular-response
GO:0071897	DNA biosynthetic process	metabolic-biosynthesis
GO:1900120	regulation of receptor binding	signalling
GO:1903010	regulation of bone development	osteo-bone
GO:1990869	cellular response to chemokine	cellular-response
GO:2000586	regulation of platelet-derived growth factor receptor-beta signaling pathway	red-blood
GO:0018057	peptidyl-lysine oxidation	peptide
GO:0007411	axon guidance	neuron
GO:0048813	dendrite morphogenesis	brain
GO:0045604	regulation of epidermal cell differentiation	epidermis
GO:0061179	negative regulation of insulin secretion involved in cellular response to glucose stimulus	secretion
GO:1904178	negative regulation of adipose tissue development	lipid
GO:0019886	antigen processing and presentation of exogenous peptide antigen via MHC class II	immune
GO:0002503	peptide antigen assembly with MHC class II protein complex	immune
GO:0002504	antigen processing and presentation of peptide or polysaccharide antigen via MHC class II	immune
GO:0030949	positive regulation of vascular endothelial growth factor receptor signaling pathway	blood-vessel
GO:0035313	wound healing, spreading of epidermal cells	regeneration-healing
GO:0031589	cell-substrate adhesion	ecm
GO:0033627	cell adhesion mediated by integrin	cell-adhesion
GO:0023035	CD40 signaling pathway	signalling
GO:2000811	negative regulation of anoikis	cell-death
GO:0010811	positive regulation of cell-substrate adhesion	ecm
GO:0033631	cell-cell adhesion mediated by integrin	cell-adhesion
GO:0045765	regulation of angiogenesis	blood-vessel
GO:0006337	nucleosome disassembly	histone-chromatin
GO:0048096	chromatin-mediated maintenance of transcription	histone-chromatin
GO:0030490	maturation of SSU-rRNA	ribosome
GO:0015914	phospholipid transport	transport
GO:0006869	lipid transport	transport
GO:0045332	phospholipid translocation	cytoskeleton
GO:0007339	binding of sperm to zona pellucida	reproduction
GO:0045766	positive regulation of angiogenesis	blood-vessel
GO:0010595	positive regulation of endothelial cell migration	blood-vessel
GO:0061614	pri-miRNA transcription by RNA polymerase II	transcription
GO:0048870	cell motility	migration
GO:0009612	response to mechanical stimulus	cellular-response
GO:0010715	regulation of extracellular matrix disassembly	ecm
GO:0021854	hypothalamus development	brain
GO:0030578	PML body organization	polarity-axis
GO:0034616	response to laminar fluid shear stress	environment-sensing
GO:0044849	estrous cycle	reproduction
GO:0050728	negative regulation of inflammatory response	myeloid
GO:0051272	positive regulation of cellular component movement	migration
GO:0060055	angiogenesis involved in wound healing	regeneration-healing
GO:0070301	cellular response to hydrogen peroxide	cellular-response
GO:0070555	response to interleukin-1	immune
GO:1901796	regulation of signal transduction by p53 class mediator	cell-cycle
GO:0035855	megakaryocyte development	red-blood
GO:2000765	regulation of cytoplasmic translation	translation
GO:1902164	positive regulation of DNA damage response, signal transduction by p53 class mediator resulting in transcription of p21 class mediator	transcription
GO:0010609	mRNA localization resulting in posttranscriptional regulation of gene expression	rna-processing
GO:1902166	negative regulation of intrinsic apoptotic signaling pathway in response to DNA damage by p53 class mediator	cell-death
GO:0007611	learning or memory	behavior
GO:0008298	intracellular mRNA localization	rna-processing
GO:0030220	platelet formation	red-blood
GO:0070889	platelet alpha granule organization	red-blood
GO:0016042	lipid catabolic process	catabolic
GO:0006897	endocytosis	cytosis-osome-vesicle
GO:0006883	cellular sodium ion homeostasis	homeostasis
GO:0007605	sensory perception of sound	environment-sensing
GO:0038003	opioid receptor signaling pathway	brain
GO:0016559	peroxisome fission	environment-sensing
GO:0016557	peroxisome membrane biogenesis	ecm
GO:0050873	brown fat cell differentiation	brain
GO:0007031	peroxisome organization	environment-sensing
GO:0019216	regulation of lipid metabolic process	metabolic-biosynthesis
GO:0044375	regulation of peroxisome size	lipid
GO:0006554	lysine catabolic process	catabolic
GO:0006081	cellular aldehyde metabolic process	metabolic-biosynthesis
GO:0019285	glycine betaine biosynthetic process from choline	metabolic-biosynthesis
GO:0042426	choline catabolic process	catabolic
GO:0007586	digestion	gut
GO:0043085	positive regulation of catalytic activity	metabolic-biosynthesis
GO:0010824	regulation of centrosome duplication	cytoskeleton
GO:0001822	kidney development	kidney-ureter
GO:0042592	homeostatic process	environment-sensing
GO:0098609	cell-cell adhesion	cell-adhesion
GO:0032006	regulation of TOR signaling	signalling
GO:0051271	negative regulation of cellular component movement	migration
GO:0030030	cell projection organization	migration
GO:0003431	growth plate cartilage chondrocyte development	osteo-bone
GO:0007052	mitotic spindle organization	cell-division
GO:0010825	positive regulation of centrosome duplication	cytoskeleton
GO:0060348	bone development	osteo-bone
GO:1905515	non-motile cilium assembly	migration
GO:0046697	decidualization	metabolic-biosynthesis
GO:1901837	negative regulation of transcription of nucleolar large rRNA by RNA polymerase I	transcription
GO:0015031	protein transport	protein-processing
GO:0016192	vesicle-mediated transport	transport
GO:0006890	retrograde vesicle-mediated transport, Golgi to endoplasmic reticulum	protein-processing
GO:0006888	endoplasmic reticulum to Golgi vesicle-mediated transport	protein-processing
GO:0048205	COPI coating of Golgi vesicle	transport
GO:0006807	nitrogen compound metabolic process	metabolic-biosynthesis
GO:0000281	mitotic cytokinesis	cell-division
GO:0014066	regulation of phosphatidylinositol 3-kinase signaling	signalling
GO:0045184	establishment of protein localization	protein-processing
GO:0061952	midbody abscission	morphogenesis
GO:1904888	cranial skeletal system development	brain
GO:0045454	cell redox homeostasis	homeostasis
GO:0051775	response to redox state	cellular-response
GO:0009966	regulation of signal transduction	signalling
GO:0009266	response to temperature stimulus	cellular-response
GO:0042262	DNA protection	DNA-repair
GO:0071451	cellular response to superoxide	cellular-response
GO:0051149	positive regulation of muscle cell differentiation	muscle
GO:0016339	calcium-dependent cell-cell adhesion via plasma membrane cell adhesion molecules	cell-adhesion
GO:0044331	cell-cell adhesion mediated by cadherin	cell-adhesion
GO:0006378	mRNA polyadenylation	rna-processing
GO:0006379	mRNA cleavage	rna-processing
GO:0031124	mRNA 3'-end processing	rna-processing
GO:0006369	termination of RNA polymerase II transcription	transcription
GO:0006398	mRNA 3'-end processing by stem-loop binding and cleavage	rna-processing
GO:0032515	negative regulation of phosphoprotein phosphatase activity	phosphorylation
GO:0050830	defense response to Gram-positive bacterium	immune
GO:0035308	negative regulation of protein dephosphorylation	phosphorylation
GO:0050710	negative regulation of cytokine secretion	secretion
GO:0006383	transcription by RNA polymerase III	transcription
GO:0035457	cellular response to interferon-alpha	immune
GO:0002520	immune system development	immune
GO:0007224	smoothened signaling pathway	muscle
GO:0009411	response to UV	cellular-response
GO:1904646	cellular response to amyloid-beta	cellular-response
GO:1904645	response to amyloid-beta	cellular-response
GO:1900272	negative regulation of long-term synaptic potentiation	synapse
GO:2001200	positive regulation of dendritic cell differentiation	dendritic-cell
GO:0032693	negative regulation of interleukin-10 production	immune
GO:0048167	regulation of synaptic plasticity	synapse
GO:0042535	positive regulation of tumor necrosis factor biosynthetic process	cell-death
GO:1902961	positive regulation of aspartic-type endopeptidase activity involved in amyloid precursor protein catabolic process	catabolic
GO:0090647	modulation of age-related behavioral decline	behavior
GO:0032735	positive regulation of interleukin-12 production	immune
GO:1900745	positive regulation of p38MAPK cascade	MAPK
GO:0150003	regulation of spontaneous synaptic transmission	synapse
GO:0045056	transcytosis	immune
GO:0150104	transport across blood-brain barrier	brain
GO:0001914	regulation of T cell mediated cytotoxicity	lymphoid
GO:0010255	glucose mediated signaling pathway	signalling
GO:1900271	regulation of long-term synaptic potentiation	synapse
GO:1900453	negative regulation of long-term synaptic depression	synapse
GO:1900744	regulation of p38MAPK cascade	MAPK
GO:1901222	regulation of NIK/NF-kappaB signaling	signalling
GO:1903523	negative regulation of blood circulation	blood-vessel
GO:1904472	positive regulation of endothelin secretion	secretion
GO:2000439	positive regulation of monocyte extravasation	monocyte
GO:2000514	regulation of CD4-positive, alpha-beta T cell activation	lymphoid
GO:0014002	astrocyte development	brain
GO:0050727	regulation of inflammatory response	myeloid
GO:0050930	induction of positive chemotaxis	environment-sensing
GO:0051101	regulation of DNA binding	replication
GO:0071639	positive regulation of monocyte chemotactic protein-1 production	monocyte
GO:0072657	protein localization to membrane	protein-processing
GO:1904597	negative regulation of connective tissue replacement involved in inflammatory response wound healing	regeneration-healing
GO:0051495	positive regulation of cytoskeleton organization	cytoskeleton
GO:0016338	calcium-independent cell-cell adhesion via plasma membrane cell-adhesion molecules	cell-adhesion
GO:0002638	negative regulation of immunoglobulin production	immune
GO:0016064	immunoglobulin mediated immune response	immune
GO:0043305	negative regulation of mast cell degranulation	lymphoid
GO:0006402	mRNA catabolic process	rna-processing
GO:0043488	regulation of mRNA stability	rna-processing
GO:0032212	positive regulation of telomere maintenance via telomerase	telomere
GO:0007292	female gamete generation	reproduction
GO:0090669	telomerase RNA stabilization	transcription
GO:1904872	regulation of telomerase RNA localization to Cajal body	rna-processing
GO:0000495	box H/ACA snoRNA 3'-end processing	metabolic-biosynthesis
GO:0009451	RNA modification	metabolic-biosynthesis
GO:0010587	miRNA catabolic process	rna-processing
GO:0071051	polyadenylation-dependent snoRNA 3'-end processing	rna-processing
GO:0090503	RNA phosphodiester bond hydrolysis, exonucleolytic	rna-processing
GO:0110008	ncRNA deadenylation	rna-processing
GO:0060044	negative regulation of cardiac muscle cell proliferation	muscle
GO:0007601	visual perception	eye
GO:0032024	positive regulation of insulin secretion	secretion
GO:0001523	retinoid metabolic process	metabolic-biosynthesis
GO:0032526	response to retinoic acid	cellular-response
GO:0060347	heart trabecula formation	heart
GO:0001654	eye development	eye
GO:0034633	retinol transport	eye
GO:0048562	embryonic organ morphogenesis	morphogenesis
GO:0048706	embryonic skeletal system development	osteo-bone
GO:0048807	female genitalia morphogenesis	reproduction
GO:0051024	positive regulation of immunoglobulin secretion	immune
GO:0060059	embryonic retina morphogenesis in camera-type eye	eye
GO:0060065	uterus development	reproduction
GO:0060068	vagina development	reproduction
GO:0060157	urinary bladder development	kidney-ureter
GO:0032691	negative regulation of interleukin-1 beta production	immune
GO:0050872	white fat cell differentiation	brain
GO:0010827	regulation of glucose transmembrane transport	transport
GO:0043950	positive regulation of cAMP-mediated signaling	signalling
GO:0070094	positive regulation of glucagon secretion	neurotransmitters
GO:0036321	ghrelin secretion	neurotransmitters
GO:0046879	hormone secretion	secretion
GO:0050912	detection of chemical stimulus involved in sensory perception of taste	environment-sensing
GO:0090275	negative regulation of somatostatin secretion	secretion
GO:0007204	positive regulation of cytosolic calcium ion concentration	calcium
GO:0045444	fat cell differentiation	brain
GO:0090336	positive regulation of brown fat cell differentiation	brain
GO:0050804	modulation of chemical synaptic transmission	synapse
GO:0099175	regulation of postsynapse organization	synapse
GO:0032435	negative regulation of proteasomal ubiquitin-dependent protein catabolic process	catabolic
GO:0061136	regulation of proteasomal protein catabolic process	catabolic
GO:0021670	lateral ventricle development	brain
GO:0030901	midbrain development	brain
GO:0048853	forebrain morphogenesis	brain
GO:0034614	cellular response to reactive oxygen species	cellular-response
GO:0038095	Fc-epsilon receptor signaling pathway	signalling
GO:1902895	positive regulation of pri-miRNA transcription by RNA polymerase II	transcription
GO:0001661	conditioned taste aversion	gut
GO:0009416	response to light stimulus	cellular-response
GO:0009629	response to gravity	cellular-response
GO:0030431	sleep	brain
GO:0032496	response to lipopolysaccharide	cellular-response
GO:0032570	response to progesterone	cellular-response
GO:0034097	response to cytokine	cellular-response
GO:0035914	skeletal muscle cell differentiation	muscle
GO:0035994	response to muscle stretch	cellular-response
GO:0051090	regulation of DNA-binding transcription factor activity	transcription
GO:0051412	response to corticosterone	cellular-response
GO:0051591	response to cAMP	cellular-response
GO:0071277	cellular response to calcium ion	calcium
GO:0006072	glycerol-3-phosphate metabolic process	metabolic-biosynthesis
GO:0046168	glycerol-3-phosphate catabolic process	catabolic
GO:0006116	NADH oxidation	oxidation
GO:0006127	glycerophosphate shuttle	metabolic-biosynthesis
GO:0006734	NADH metabolic process	metabolic-biosynthesis
GO:0045821	positive regulation of glycolytic process	metabolic-biosynthesis
GO:0046486	glycerolipid metabolic process	metabolic-biosynthesis
GO:0071320	cellular response to cAMP	cellular-response
GO:0071356	cellular response to tumor necrosis factor	cellular-response
GO:0006654	phosphatidic acid biosynthetic process	metabolic-biosynthesis
GO:0031065	positive regulation of histone deacetylation	histone-chromatin
GO:0001816	cytokine production	metabolic-biosynthesis
GO:0030330	DNA damage response, signal transduction by p53 class mediator	DNA-repair
GO:0043011	myeloid dendritic cell differentiation	dendritic-cell
GO:0045190	isotype switching	metabolic-biosynthesis
GO:0042832	defense response to protozoan	cellular-response
GO:0060218	hematopoietic stem cell differentiation	hematopoiesis
GO:0072540	T-helper 17 cell lineage commitment	lymphoid
GO:0072539	T-helper 17 cell differentiation	lymphoid
GO:0002320	lymphoid progenitor cell differentiation	lymphoid
GO:0045064	T-helper 2 cell differentiation	lymphoid
GO:0051321	meiotic cell cycle	cell-cycle
GO:0007130	synaptonemal complex assembly	synapse
GO:0140013	meiotic nuclear division	cell-cycle
GO:0007140	male meiotic nuclear division	reproduction
GO:0007143	female meiotic nuclear division	reproduction
GO:0009566	fertilization	reproduction
GO:0009887	animal organ morphogenesis	morphogenesis
GO:0048808	male genitalia morphogenesis	reproduction
GO:0050910	detection of mechanical stimulus involved in sensory perception of sound	auditory
GO:0060088	auditory receptor cell stereocilium organization	auditory
GO:0044241	lipid digestion	gut
GO:0008380	RNA splicing	rna-processing
GO:0007059	chromosome segregation	cell-cycle
GO:0045070	positive regulation of viral genome replication	immune
GO:0048024	regulation of mRNA splicing, via spliceosome	rna-processing
GO:0000245	spliceosomal complex assembly	regeneration-healing
GO:0050684	regulation of mRNA processing	rna-processing
GO:0035092	sperm chromatin condensation	reproduction
GO:0043171	peptide catabolic process	catabolic
GO:0002528	regulation of vascular permeability involved in acute inflammatory response	myeloid
GO:0007517	muscle organ development	muscle
GO:0009314	response to radiation	cellular-response
GO:1990000	amyloid fibril formation	brain
GO:0006694	steroid biosynthetic process	metabolic-biosynthesis
GO:0016126	sterol biosynthetic process	metabolic-biosynthesis
GO:0050714	positive regulation of protein secretion	secretion
GO:1904706	negative regulation of vascular smooth muscle cell proliferation	muscle
GO:0010718	positive regulation of epithelial to mesenchymal transition	differentiation
GO:0051781	positive regulation of cell division	cell-cycle
GO:0030512	negative regulation of transforming growth factor beta receptor signaling pathway	immune
GO:0043627	response to estrogen	cellular-response
GO:0048565	digestive tract development	gut
GO:0048702	embryonic neurocranium morphogenesis	brain
GO:0048839	inner ear development	auditory
GO:0060364	frontal suture morphogenesis	osteo-bone
GO:0030501	positive regulation of bone mineralization	osteo-bone
GO:0051491	positive regulation of filopodium assembly	migration
GO:0062009	secondary palate development	olfactory
GO:0051496	positive regulation of stress fiber assembly	ecm
GO:0043524	negative regulation of neuron apoptotic process	neuron
GO:0032967	positive regulation of collagen biosynthetic process	metabolic-biosynthesis
GO:0007435	salivary gland morphogenesis	glands
GO:0010936	negative regulation of macrophage cytokine production	monocyte
GO:0042476	odontogenesis	osteo-bone
GO:0042704	uterine wall breakdown	reproduction
GO:0043932	ossification involved in bone remodeling	osteo-bone
GO:0048286	lung alveolus development	lung
GO:0060325	face morphogenesis	morphogenesis
GO:0060391	positive regulation of SMAD protein signal transduction	protein-processing
GO:0070483	detection of hypoxia	environment-sensing
GO:1905075	positive regulation of tight junction disassembly	ecm
GO:0097037	heme export	blood-vessel
GO:0098734	macromolecule depalmitoylation	metabolic-biosynthesis
GO:0046949	fatty-acyl-CoA biosynthetic process	metabolic-biosynthesis
GO:0045859	regulation of protein kinase activity	kinase
GO:0085020	protein K6-linked ubiquitination	protein-processing
GO:0007050	cell cycle arrest	cell-cycle
GO:0001894	tissue homeostasis	homeostasis
GO:0042325	regulation of phosphorylation	phosphorylation
GO:0000729	DNA double-strand break processing	DNA-repair
GO:0006303	double-strand break repair via nonhomologous end joining	DNA-repair
GO:0046826	negative regulation of protein export from nucleus	protein-processing
GO:0031441	negative regulation of mRNA 3'-end processing	rna-processing
GO:0035735	intraciliary transport involved in cilium assembly	transport
GO:0035721	intraciliary retrograde transport	transport
GO:0045684	positive regulation of epidermis development	epidermis
GO:0061436	establishment of skin barrier	epidermis
GO:0045055	regulated exocytosis	cytosis-osome-vesicle
GO:0002070	epithelial cell maturation	differentiation
GO:0031069	hair follicle morphogenesis	hair
GO:0042335	cuticle development	epidermis
GO:0070268	cornification	eye
GO:0060041	retina development in camera-type eye	eye
GO:0043537	negative regulation of blood vessel endothelial cell migration	blood-vessel
GO:0061154	endothelial tube morphogenesis	neural-tube
GO:0033574	response to testosterone	cellular-response
GO:0097421	liver regeneration	regeneration-healing
GO:0006656	phosphatidylcholine biosynthetic process	metabolic-biosynthesis
GO:0032927	positive regulation of activin receptor signaling pathway	signalling
GO:0033211	adiponectin-activated signaling pathway	lipid
GO:0061024	membrane organization	transport
GO:0007154	cell communication	ecm
GO:1901029	negative regulation of mitochondrial outer membrane permeabilization involved in apoptotic signaling pathway	mitochondrion
GO:0015866	ADP transport	transport
GO:0015853	adenine transport	transport
GO:0015867	ATP transport	transport
GO:0051503	adenine nucleotide transport	transport
GO:0042254	ribosome biogenesis	protein-processing
GO:1904749	regulation of protein localization to nucleolus	protein-processing
GO:0000462	maturation of SSU-rRNA from tricistronic rRNA transcript (SSU-rRNA, 5.8S rRNA, LSU-rRNA)	ribosome
GO:0001825	blastocyst formation	blastocyst
GO:0001829	trophectodermal cell differentiation	blastocyst
GO:0008283	cell population proliferation	cell-division
GO:0034477	U6 snRNA 3'-end processing	ribosome
GO:0033617	mitochondrial respiratory chain complex IV assembly	mitochondrion
GO:0006997	nucleus organization	cytoskeleton
GO:0031122	cytoplasmic microtubule organization	cytoskeleton
GO:0007015	actin filament organization	cytoskeleton
GO:0042989	sequestering of actin monomers	cytoskeleton
GO:0006665	sphingolipid metabolic process	metabolic-biosynthesis
GO:0030148	sphingolipid biosynthetic process	metabolic-biosynthesis
GO:0046513	ceramide biosynthetic process	metabolic-biosynthesis
GO:0051260	protein homooligomerization	protein-processing
GO:0016477	cell migration	migration
GO:0043149	stress fiber assembly	ecm
GO:0035024	negative regulation of Rho protein signal transduction	growth-regulation
GO:0045740	positive regulation of DNA replication	replication
GO:0016075	rRNA catabolic process	ribosome
GO:0071286	cellular response to magnesium ion	cellular-response
GO:0036345	platelet maturation	red-blood
GO:0071287	cellular response to manganese ion	cellular-response
GO:0070987	error-free translesion synthesis	metabolic-biosynthesis
GO:0016242	negative regulation of macroautophagy	cell-death
GO:0070584	mitochondrion morphogenesis	mitochondrion
GO:0090051	negative regulation of cell migration involved in sprouting angiogenesis	blood-vessel
GO:0034115	negative regulation of heterotypic cell-cell adhesion	cell-adhesion
GO:0071499	cellular response to laminar fluid shear stress	cellular-response
GO:0045415	negative regulation of interleukin-8 biosynthetic process	immune
GO:0051247	positive regulation of protein metabolic process	metabolic-biosynthesis
GO:0060761	negative regulation of response to cytokine stimulus	environment-sensing
GO:0070375	ERK5 cascade	signalling
GO:2000342	negative regulation of chemokine (C-X-C motif) ligand 2 production	signalling
GO:0010569	regulation of double-strand break repair via homologous recombination	DNA-repair
GO:0051013	microtubule severing	cytoskeleton
GO:2001020	regulation of response to DNA damage stimulus	DNA-repair
GO:1900186	negative regulation of clathrin-dependent endocytosis	cytosis-osome-vesicle
GO:1903071	positive regulation of ER-associated ubiquitin-dependent protein catabolic process	catabolic
GO:1904021	negative regulation of G protein-coupled receptor internalization	transport
GO:0042475	odontogenesis of dentin-containing tooth	osteo-bone
GO:0090277	positive regulation of peptide hormone secretion	secretion
GO:0003050	regulation of systemic arterial blood pressure by atrial natriuretic peptide	heart
GO:0016573	histone acetylation	histone-chromatin
GO:0006625	protein targeting to peroxisome	protein-processing
GO:0006513	protein monoubiquitination	protein-processing
GO:0016558	protein import into peroxisome matrix	protein-processing
GO:0030574	collagen catabolic process	catabolic
GO:0010760	negative regulation of macrophage chemotaxis	monocyte
GO:0001578	microtubule bundle formation	cytoskeleton
GO:0031110	regulation of microtubule polymerization or depolymerization	cytoskeleton
GO:0060296	regulation of cilium beat frequency involved in ciliary motility	migration
GO:0045745	positive regulation of G protein-coupled receptor signaling pathway	signalling
GO:1904825	protein localization to microtubule plus-end	cytoskeleton
GO:0007169	transmembrane receptor protein tyrosine kinase signaling pathway	kinase
GO:0007264	small GTPase mediated signal transduction	brain
GO:0038083	peptidyl-tyrosine autophosphorylation	peptide
GO:0060071	Wnt signaling pathway, planar cell polarity pathway	polarity-axis
GO:0048013	ephrin receptor signaling pathway	growth-regulation
GO:0072583	clathrin-dependent endocytosis	cytosis-osome-vesicle
GO:0034383	low-density lipoprotein particle clearance	lipid
GO:0050690	regulation of defense response to virus by virus	immune
GO:0032802	low-density lipoprotein particle receptor catabolic process	catabolic
GO:0003279	cardiac septum development	heart
GO:0003281	ventricular septum development	heart
GO:0045807	positive regulation of endocytosis	cytosis-osome-vesicle
GO:0048268	clathrin coat assembly	ecm
GO:0060976	coronary vasculature development	heart
GO:0098884	postsynaptic neurotransmitter receptor internalization	neurotransmitters
GO:0099590	neurotransmitter receptor internalization	neurotransmitters
GO:1905477	positive regulation of protein localization to membrane	protein-processing
GO:0002479	antigen processing and presentation of exogenous peptide antigen via MHC class I, TAP-dependent	immune
GO:0002474	antigen processing and presentation of peptide antigen via MHC class I	immune
GO:0045953	negative regulation of natural killer cell mediated cytotoxicity	lymphoid
GO:0060337	type I interferon signaling pathway	immune
GO:0006968	cellular defense response	immune
GO:0060907	positive regulation of macrophage cytokine production	monocyte
GO:0002729	positive regulation of natural killer cell cytokine production	lymphoid
GO:2000353	positive regulation of endothelial cell apoptotic process	blood-vessel
GO:0002480	antigen processing and presentation of exogenous peptide antigen via MHC class I, TAP-independent	immune
GO:0042270	protection from natural killer cell mediated cytotoxicity	lymphoid
GO:0050777	negative regulation of immune response	immune
GO:0002476	antigen processing and presentation of endogenous peptide antigen via MHC class Ib	immune
GO:0070207	protein homotrimerization	protein-processing
GO:2000774	positive regulation of cellular senescence	aging
GO:0002451	peripheral B cell tolerance induction	lymphoid
GO:0002645	positive regulation of tolerance induction	immune
GO:0002666	positive regulation of T cell tolerance induction	lymphoid
GO:0002767	immune response-inhibiting cell surface receptor signaling pathway	immune
GO:0042130	negative regulation of T cell proliferation	lymphoid
GO:0070317	negative regulation of G0 to G1 transition	cell-cycle
GO:2001199	negative regulation of dendritic cell differentiation	dendritic-cell
GO:0030522	intracellular receptor signaling pathway	signalling
GO:0043401	steroid hormone mediated signaling pathway	signalling
GO:0009755	hormone-mediated signaling pathway	signalling
GO:0007420	brain development	brain
GO:0033993	response to lipid	cellular-response
GO:0017055	negative regulation of RNA polymerase II transcriptional preinitiation complex assembly	transcription
GO:0002154	thyroid hormone mediated signaling pathway	glands
GO:0030878	thyroid gland development	glands
GO:2000143	negative regulation of DNA-templated transcription, initiation	transcription
GO:0002155	regulation of thyroid hormone mediated signaling pathway	glands
GO:0008016	regulation of heart contraction	heart
GO:0008050	female courtship behavior	reproduction
GO:0030218	erythrocyte differentiation	red-blood
GO:0033032	regulation of myeloid cell apoptotic process	hematopoiesis
GO:0045925	positive regulation of female receptivity	reproduction
GO:0050994	regulation of lipid catabolic process	catabolic
GO:0043087	regulation of GTPase activity	brain
GO:0006898	receptor-mediated endocytosis	cytosis-osome-vesicle
GO:0010875	positive regulation of cholesterol efflux	lipid
GO:0033700	phospholipid efflux	lipid
GO:0032940	secretion by cell	secretion
GO:0019725	cellular homeostasis	homeostasis
GO:0030216	keratinocyte differentiation	epidermis
GO:0031424	keratinization	ecm
GO:0035627	ceramide transport	transport
GO:0043129	surfactant homeostasis	homeostasis
GO:0032922	circadian regulation of gene expression	circadian-rhythm
GO:0005978	glycogen biosynthetic process	metabolic-biosynthesis
GO:0010498	proteasomal protein catabolic process	catabolic
GO:0042749	regulation of circadian sleep/wake cycle	circadian-rhythm
GO:0043124	negative regulation of I-kappaB kinase/NF-kappaB signaling	signalling
GO:0044321	response to leptin	cellular-response
GO:0060086	circadian temperature homeostasis	homeostasis
GO:0061178	regulation of insulin secretion involved in cellular response to glucose stimulus	secretion
GO:0061469	regulation of type B pancreatic cell proliferation	pancreas
GO:0061889	negative regulation of astrocyte activation	brain
GO:0070859	positive regulation of bile acid biosynthetic process	metabolic-biosynthesis
GO:0120163	negative regulation of cold-induced thermogenesis	environment-sensing
GO:0150079	negative regulation of neuroinflammatory response	brain
GO:0001678	cellular glucose homeostasis	homeostasis
GO:0010871	negative regulation of receptor biosynthetic process	metabolic-biosynthesis
GO:0034144	negative regulation of toll-like receptor 4 signaling pathway	immune
GO:0007616	long-term memory	brain
GO:0033081	regulation of T cell differentiation in thymus	lymphoid
GO:0045670	regulation of osteoclast differentiation	osteo-bone
GO:0009954	proximal/distal pattern formation	polarity-axis
GO:0030326	embryonic limb morphogenesis	limb
GO:0032747	positive regulation of interleukin-23 production	immune
GO:0008219	cell death	cell-death
GO:0045084	positive regulation of interleukin-12 biosynthetic process	immune
GO:0045377	positive regulation of interleukin-16 biosynthetic process	immune
GO:0050832	defense response to fungus	cellular-response
GO:0072537	fibroblast activation	ecm
GO:0097400	interleukin-17-mediated signaling pathway	immune
GO:0097530	granulocyte migration	myeloid
GO:0035278	miRNA mediated inhibition of translation	translation
GO:1904685	positive regulation of metalloendopeptidase activity	metabolic-biosynthesis
GO:0006606	protein import into nucleus	protein-processing
GO:0060259	regulation of feeding behavior	behavior
GO:0045747	positive regulation of Notch signaling pathway	notch
GO:0097009	energy homeostasis	homeostasis
GO:0060396	growth hormone receptor signaling pathway	signalling
GO:0070102	interleukin-6-mediated signaling pathway	immune
GO:0035019	somatic stem cell population maintenance	cell-division
GO:0060019	radial glial cell differentiation	brain
GO:0070106	interleukin-27-mediated signaling pathway	immune
GO:0001659	temperature homeostasis	homeostasis
GO:0071345	cellular response to cytokine stimulus	cellular-response
GO:0042755	eating behavior	behavior
GO:0019953	sexual reproduction	reproduction
GO:0033210	leptin-mediated signaling pathway	signalling
GO:0001754	eye photoreceptor cell differentiation	eye
GO:0010730	negative regulation of hydrogen peroxide biosynthetic process	metabolic-biosynthesis
GO:0042789	mRNA transcription by RNA polymerase II	rna-processing
GO:0044320	cellular response to leptin stimulus	cellular-response
GO:0045820	negative regulation of glycolytic process	metabolic-biosynthesis
GO:0046902	regulation of mitochondrial membrane permeability	mitochondrion
GO:0048708	astrocyte differentiation	brain
GO:0060548	negative regulation of cell death	cell-death
GO:0099527	postsynapse to nucleus signaling pathway	synapse
GO:1902728	positive regulation of growth factor dependent skeletal muscle satellite cell proliferation	muscle
GO:1905564	positive regulation of vascular endothelial cell proliferation	blood-vessel
GO:2000637	positive regulation of gene silencing by miRNA	transcription
GO:2000737	negative regulation of stem cell differentiation	differentiation
GO:2001223	negative regulation of neuron migration	neuron
GO:0042109	lymphotoxin A biosynthetic process	lymphoid
GO:0042089	cytokine biosynthetic process	metabolic-biosynthesis
GO:0045076	regulation of interleukin-2 biosynthetic process	immune
GO:0045408	regulation of interleukin-6 biosynthetic process	immune
GO:0045414	regulation of interleukin-8 biosynthetic process	immune
GO:0045423	regulation of granulocyte macrophage colony-stimulating factor biosynthetic process	monocyte
GO:0048255	mRNA stabilization	rna-processing
GO:0010467	gene expression	transcription
GO:0006814	sodium ion transport	transport
GO:0006885	regulation of pH	environment-sensing
GO:0006812	cation transport	transport
GO:0035725	sodium ion transmembrane transport	transport
GO:0098656	anion transmembrane transport	transport
GO:0071805	potassium ion transmembrane transport	transport
GO:0051453	regulation of intracellular pH	environment-sensing
GO:0098719	sodium ion import across plasma membrane	muscle
GO:0051492	regulation of stress fiber assembly	cytoskeleton
GO:0007097	nuclear migration	migration
GO:0051660	establishment of centrosome localization	cytoskeleton
GO:0071630	nuclear protein quality control by the ubiquitin-proteasome system	protein-processing
GO:0072671	mitochondria-associated ubiquitin-dependent protein catabolic process	catabolic
GO:0006850	mitochondrial pyruvate transmembrane transport	metabolic-biosynthesis
GO:0035774	positive regulation of insulin secretion involved in cellular response to glucose stimulus	secretion
GO:0061732	mitochondrial acetyl-CoA biosynthetic process from pyruvate	metabolic-biosynthesis
GO:0002690	positive regulation of leukocyte chemotaxis	environment-sensing
GO:0022008	neurogenesis	brain
GO:0001764	neuron migration	neuron
GO:0007219	Notch signaling pathway	notch
GO:0050793	regulation of developmental process	growth-regulation
GO:0060354	negative regulation of cell adhesion molecule production	cell-adhesion
GO:0045446	endothelial cell differentiation	blood-vessel
GO:0001709	cell fate determination	differentiation
GO:0030097	hemopoiesis	hematopoiesis
GO:0045596	negative regulation of cell differentiation	differentiation
GO:0001569	branching involved in blood vessel morphogenesis	blood-vessel
GO:0001944	vasculature development	blood-vessel
GO:0001763	morphogenesis of a branching structure	blood-vessel
GO:2000048	negative regulation of cell-cell adhesion mediated by cadherin	cell-adhesion
GO:0007221	positive regulation of transcription of Notch receptor target	notch
GO:0045602	negative regulation of endothelial cell differentiation	blood-vessel
GO:0001837	epithelial to mesenchymal transition	differentiation
GO:0000387	spliceosomal snRNP assembly	regeneration-healing
GO:0006353	DNA-templated transcription, termination	transcription
GO:0051170	import into nucleus	transport
GO:0008154	actin polymerization or depolymerization	cytoskeleton
GO:0061001	regulation of dendritic spine morphogenesis	spine
GO:2000601	positive regulation of Arp2/3 complex-mediated actin nucleation	cytoskeleton
GO:0070309	lens fiber cell morphogenesis	eye
GO:0016601	Rac protein signal transduction	protein-processing
GO:0002548	monocyte chemotaxis	monocyte
GO:0030593	neutrophil chemotaxis	myeloid
GO:0048245	eosinophil chemotaxis	myeloid
GO:0048247	lymphocyte chemotaxis	lymphoid
GO:0071346	cellular response to interferon-gamma	immune
GO:0008612	peptidyl-lysine modification to peptidyl-hypusine	peptide
GO:0035860	glial cell-derived neurotrophic factor receptor signaling pathway	brain
GO:0007422	peripheral nervous system development	spine
GO:0048485	sympathetic nervous system development	spine
GO:0048666	neuron development	neuron
GO:0006408	snRNA export from nucleus	ribosome
GO:0042795	snRNA transcription by RNA polymerase II	transcription
GO:0051168	nuclear export	transport
GO:0016197	endosomal transport	transport
GO:2000009	negative regulation of protein localization to cell surface	protein-processing
GO:0007032	endosome organization	cytosis-osome-vesicle
GO:0097320	plasma membrane tubulation	ecm
GO:0045806	negative regulation of endocytosis	cytosis-osome-vesicle
GO:0044351	macropinocytosis	cytosis-osome-vesicle
GO:0036089	cleavage furrow formation	cell-division
GO:0017038	protein import	protein-processing
GO:0006044	N-acetylglucosamine metabolic process	metabolic-biosynthesis
GO:0006048	UDP-N-acetylglucosamine biosynthetic process	metabolic-biosynthesis
GO:0008217	regulation of blood pressure	blood-vessel
GO:0006051	N-acetylmannosamine metabolic process	metabolic-biosynthesis
GO:0019262	N-acetylneuraminate catabolic process	neural-crest
GO:0009967	positive regulation of signal transduction	signalling
GO:0007254	JNK cascade	MAPK
GO:2000147	positive regulation of cell motility	migration
GO:0009303	rRNA transcription	ribosome
GO:0009306	protein secretion	protein-processing
GO:0002329	pre-B cell differentiation	lymphoid
GO:0003341	cilium movement	migration
GO:0060285	cilium-dependent cell motility	lymphoid
GO:0036159	inner dynein arm assembly	protein-processing
GO:0038063	collagen-activated tyrosine kinase receptor signaling pathway	signalling
GO:0033674	positive regulation of kinase activity	kinase
GO:0044319	wound healing, spreading of cells	regeneration-healing
GO:0014909	smooth muscle cell migration	muscle
GO:0061302	smooth muscle cell-matrix adhesion	muscle
GO:0030206	chondroitin sulfate biosynthetic process	metabolic-biosynthesis
GO:0030207	chondroitin sulfate catabolic process	catabolic
GO:0030208	dermatan sulfate biosynthetic process	metabolic-biosynthesis
GO:0048771	tissue remodeling	ecm
GO:0006929	substrate-dependent cell migration	lymphoid
GO:0008347	glial cell migration	microglia
GO:0048008	platelet-derived growth factor receptor signaling pathway	red-blood
GO:0097178	ruffle assembly	ecm
GO:0006139	nucleobase-containing compound metabolic process	metabolic-biosynthesis
GO:0045815	positive regulation of gene expression, epigenetic	methylation
GO:0032508	DNA duplex unwinding	replication
GO:0000727	double-strand break repair via break-induced replication	DNA-repair
GO:1902975	mitotic DNA replication initiation	cell-division
GO:0006267	pre-replicative complex assembly involved in nuclear cell cycle DNA replication	cell-cycle
GO:0006271	DNA strand elongation involved in DNA replication	replication
GO:0090630	activation of GTPase activity	brain
GO:0001935	endothelial cell proliferation	blood-vessel
GO:0071425	hematopoietic stem cell proliferation	hematopoiesis
GO:0030195	negative regulation of blood coagulation	blood-vessel
GO:0038001	paracrine signaling	kidney-ureter
GO:0003094	glomerular filtration	kidney-ureter
GO:0045019	negative regulation of nitric oxide biosynthetic process	kidney-ureter
GO:0042482	positive regulation of odontogenesis	osteo-bone
GO:2001214	positive regulation of vasculogenesis	blood-vessel
GO:1900041	negative regulation of interleukin-2 secretion	immune
GO:0072011	glomerular endothelium development	kidney-ureter
GO:0003158	endothelium development	blood-vessel
GO:0035759	mesangial cell-matrix adhesion	ecm
GO:0060290	transdifferentiation	differentiation
GO:0061042	vascular wound healing	regeneration-healing
GO:0071657	positive regulation of granulocyte colony-stimulating factor production	myeloid
GO:0071971	extracellular exosome assembly	ecm
GO:0072254	metanephric glomerular mesangial cell differentiation	kidney-ureter
GO:1900035	negative regulation of cellular response to heat	environment-sensing
GO:1900038	negative regulation of cellular response to hypoxia	environment-sensing
GO:1900168	positive regulation of glial cell-derived neurotrophic factor secretion	brain
GO:0032418	lysosome localization	cytosis-osome-vesicle
GO:1900029	positive regulation of ruffle assembly	ecm
GO:1900087	positive regulation of G1/S transition of mitotic cell cycle	cell-division
GO:0044772	mitotic cell cycle phase transition	cell-division
GO:0045737	positive regulation of cyclin-dependent protein serine/threonine kinase activity	kinase
GO:0046626	regulation of insulin receptor signaling pathway	pancreas
GO:0015884	folic acid transport	transport
GO:0015886	heme transport	transport
GO:0051958	methotrexate transport	transport
GO:0046655	folic acid metabolic process	metabolic-biosynthesis
GO:1904447	folate import across plasma membrane	gut
GO:0098829	intestinal folate absorption	gut
GO:0045664	regulation of neuron differentiation	neuron
GO:0031103	axon regeneration	regeneration-healing
GO:0070072	vacuolar proton-transporting V-type ATPase complex assembly	transport
GO:0007042	lysosomal lumen acidification	metabolic-biosynthesis
GO:1905146	lysosomal protein catabolic process	catabolic
GO:1902751	positive regulation of cell cycle G2/M phase transition	cell-cycle
GO:0007088	regulation of mitotic nuclear division	cell-division
GO:0110032	positive regulation of G2/MI transition of meiotic cell cycle	cell-cycle
GO:0009792	embryo development ending in birth or egg hatching	blastocyst
GO:0048477	oogenesis	reproduction
GO:0033234	negative regulation of protein sumoylation	protein-processing
GO:0045666	positive regulation of neuron differentiation	neuron
GO:0048709	oligodendrocyte differentiation	brain
GO:0051258	protein polymerization	protein-processing
GO:0048260	positive regulation of receptor-mediated endocytosis	cytosis-osome-vesicle
GO:0032092	positive regulation of protein binding	protein-processing
GO:0014911	positive regulation of smooth muscle cell migration	muscle
GO:0090303	positive regulation of wound healing	regeneration-healing
GO:0032367	intracellular cholesterol transport	transport
GO:0010873	positive regulation of cholesterol esterification	lipid
GO:0070508	cholesterol import	lipid
GO:0010879	cholesterol transport involved in cholesterol storage	transport
GO:1904668	positive regulation of ubiquitin protein ligase activity	protein-processing
GO:0031145	anaphase-promoting complex-dependent catabolic process	cell-division
GO:1901990	regulation of mitotic cell cycle phase transition	cell-division
GO:0070979	protein K11-linked ubiquitination	protein-processing
GO:0072425	signal transduction involved in G2 DNA damage checkpoint	cell-cycle
GO:0040020	regulation of meiotic nuclear division	cell-cycle
GO:0070306	lens fiber cell differentiation	eye
GO:0090344	negative regulation of cell aging	aging
GO:0048678	response to axon injury	cellular-response
GO:0034128	negative regulation of MyD88-independent toll-like receptor signaling pathway	immune
GO:1901214	regulation of neuron death	neuron
GO:0009749	response to glucose	cellular-response
GO:0019677	NAD catabolic process	catabolic
GO:1904059	regulation of locomotor rhythm	migration
GO:0071559	response to transforming growth factor beta	immune
GO:0006813	potassium ion transport	transport
GO:1990573	potassium ion import across plasma membrane	transport
GO:0007588	excretion	transport
GO:0008643	carbohydrate transport	transport
GO:0071702	organic substance transport	transport
GO:0048022	negative regulation of melanin biosynthetic process	melanocyte
GO:1903507	negative regulation of nucleic acid-templated transcription	transcription
GO:0033522	histone H2A ubiquitination	histone-chromatin
GO:0006301	postreplication repair	DNA-repair
GO:0001835	blastocyst hatching	blastocyst
GO:0016574	histone ubiquitination	histone-chromatin
GO:0060135	maternal process involved in female pregnancy	reproduction
GO:0048705	skeletal system morphogenesis	osteo-bone
GO:0060323	head morphogenesis	morphogenesis
GO:0043254	regulation of protein-containing complex assembly	protein-processing
GO:0007005	mitochondrion organization	mitochondrion
GO:0043967	histone H4 acetylation	histone-chromatin
GO:0045787	positive regulation of cell cycle	cell-cycle
GO:0043981	histone H4-K5 acetylation	histone-chromatin
GO:0043982	histone H4-K8 acetylation	histone-chromatin
GO:0043984	histone H4-K16 acetylation	histone-chromatin
GO:0019046	release from viral latency	immune
GO:0031340	positive regulation of vesicle fusion	transport
GO:0045956	positive regulation of calcium ion-dependent exocytosis	cytosis-osome-vesicle
GO:0048791	calcium ion-regulated exocytosis of neurotransmitter	cytosis-osome-vesicle
GO:2000271	positive regulation of fibroblast apoptotic process	cell-death
GO:0012501	programmed cell death	cell-death
GO:0034109	homotypic cell-cell adhesion	cell-adhesion
GO:0006909	phagocytosis	cytosis-osome-vesicle
GO:0043652	engulfment of apoptotic cell	cell-death
GO:0051451	myoblast migration	muscle
GO:1902742	apoptotic process involved in development	cell-death
GO:0022409	positive regulation of cell-cell adhesion	cell-adhesion
GO:0051147	regulation of muscle cell differentiation	muscle
GO:0014719	skeletal muscle satellite cell activation	muscle
GO:0043277	apoptotic cell clearance	cell-death
GO:0014816	skeletal muscle satellite cell differentiation	muscle
GO:0014841	skeletal muscle satellite cell proliferation	muscle
GO:0033002	muscle cell proliferation	muscle
GO:0043654	recognition of apoptotic cell	cell-death
GO:0048627	myoblast development	muscle
GO:0048641	regulation of skeletal muscle tissue development	muscle
GO:0055001	muscle cell development	muscle
GO:2000288	positive regulation of myoblast proliferation	muscle
GO:0071929	alpha-tubulin acetylation	cytoskeleton
GO:0070507	regulation of microtubule cytoskeleton organization	cytoskeleton
GO:0048312	intracellular distribution of mitochondria	mitochondrion
GO:0048699	generation of neurons	neuron
GO:0031113	regulation of microtubule polymerization	cytoskeleton
GO:0034063	stress granule assembly	stress-response
GO:0031116	positive regulation of microtubule polymerization	cytoskeleton
GO:0006475	internal protein amino acid acetylation	protein-processing
GO:0010917	negative regulation of mitochondrial membrane potential	mitochondrion
GO:0016072	rRNA metabolic process	metabolic-biosynthesis
GO:0019896	axonal transport of mitochondrion	transport
GO:0021954	central nervous system neuron development	spine
GO:0032930	positive regulation of superoxide anion generation	metabolic-biosynthesis
GO:0033044	regulation of chromosome organization	histone-chromatin
GO:0033673	negative regulation of kinase activity	kinase
GO:0046785	microtubule polymerization	cytoskeleton
GO:0050808	synapse organization	synapse
GO:0050848	regulation of calcium-mediated signaling	calcium
GO:0061564	axon development	neuron
GO:0072386	plus-end-directed organelle transport along microtubule	transport
GO:0090140	regulation of mitochondrial fission	mitochondrion
GO:0090258	negative regulation of mitochondrial fission	mitochondrion
GO:0097435	supramolecular fiber organization	cytoskeleton
GO:0098930	axonal transport	transport
GO:1900034	regulation of cellular response to heat	cellular-response
GO:1900452	regulation of long-term synaptic depression	synapse
GO:1902474	positive regulation of protein localization to synapse	synapse
GO:1902988	neurofibrillary tangle assembly	brain
GO:1903748	negative regulation of establishment of protein localization to mitochondrion	mitochondrion
GO:1903829	positive regulation of cellular protein localization	protein-processing
GO:1904428	negative regulation of tubulin deacetylation	cytoskeleton
GO:1905689	positive regulation of diacylglycerol kinase activity	kinase
GO:1990416	cellular response to brain-derived neurotrophic factor stimulus	brain
GO:0030833	regulation of actin filament polymerization	cytoskeleton
GO:0034314	Arp2/3 complex-mediated actin nucleation	cytoskeleton
GO:0038096	Fc-gamma receptor signaling pathway involved in phagocytosis	cytosis-osome-vesicle
GO:0021769	orbitofrontal cortex development	brain
GO:0030011	maintenance of cell polarity	cytoskeleton
GO:0051639	actin filament network formation	cytoskeleton
GO:0061842	microtubule organizing center localization	cytoskeleton
GO:0097581	lamellipodium organization	migration
GO:0006904	vesicle docking involved in exocytosis	cytosis-osome-vesicle
GO:0032400	melanosome localization	melanocyte
GO:0033619	membrane protein proteolysis	protein-processing
GO:0048026	positive regulation of mRNA splicing, via spliceosome	rna-processing
GO:0051302	regulation of cell division	cell-cycle
GO:0021795	cerebral cortex cell migration	brain
GO:0007189	adenylate cyclase-activating G protein-coupled receptor signaling pathway	signalling
GO:1901386	negative regulation of voltage-gated calcium channel activity	calcium
GO:0007567	parturition	reproduction
GO:0007190	activation of adenylate cyclase activity	metabolic-biosynthesis
GO:0071376	cellular response to corticotropin-releasing hormone stimulus	cellular-response
GO:0010578	regulation of adenylate cyclase activity involved in G protein-coupled receptor signaling pathway	signalling
GO:0051458	corticotropin secretion	secretion
GO:2000852	regulation of corticosterone secretion	secretion
GO:0032465	regulation of cytokinesis	cell-division
GO:0000022	mitotic spindle elongation	cell-division
GO:0051694	pointed-end actin filament capping	cytoskeleton
GO:0030838	positive regulation of actin filament polymerization	cytoskeleton
GO:0030239	myofibril assembly	cytoskeleton
GO:0045010	actin nucleation	cytoskeleton
GO:0006616	SRP-dependent cotranslational protein targeting to membrane, translocation	translation
GO:0045048	protein insertion into ER membrane	protein-processing
GO:0032964	collagen biosynthetic process	metabolic-biosynthesis
GO:0006164	purine nucleotide biosynthetic process	kidney-ureter
GO:0006189	'de novo' IMP biosynthetic process	metabolic-biosynthesis
GO:0009168	purine ribonucleoside monophosphate biosynthetic process	kidney-ureter
GO:0003360	brainstem development	brain
GO:0009116	nucleoside metabolic process	metabolic-biosynthesis
GO:0009259	ribonucleotide metabolic process	metabolic-biosynthesis
GO:0010035	response to inorganic substance	cellular-response
GO:0046452	dihydrofolate metabolic process	metabolic-biosynthesis
GO:0046654	tetrahydrofolate biosynthetic process	metabolic-biosynthesis
GO:0098761	cellular response to interleukin-7	immune
GO:0017157	regulation of exocytosis	cytosis-osome-vesicle
GO:0006887	exocytosis	cytosis-osome-vesicle
GO:0071526	semaphorin-plexin signaling pathway	brain
GO:0007162	negative regulation of cell adhesion	cell-adhesion
GO:0050772	positive regulation of axonogenesis	neuron
GO:1902287	semaphorin-plexin signaling pathway involved in axon guidance	neuron
GO:0001756	somitogenesis	mesoderm
GO:0021935	cerebellar granule cell precursor tangential migration	brain
GO:0051642	centrosome localization	cytoskeleton
GO:0045665	negative regulation of neuron differentiation	neuron
GO:0007530	sex determination	reproduction
GO:0007423	sensory organ development	brain
GO:0060324	face development	morphogenesis
GO:1901621	negative regulation of smoothened signaling pathway involved in dorsal/ventral neural tube patterning	neural-tube
GO:0006626	protein targeting to mitochondrion	mitochondrion
GO:0030150	protein import into mitochondrial matrix	mitochondrion
GO:0010954	positive regulation of protein processing	protein-processing
GO:0043666	regulation of phosphoprotein phosphatase activity	phosphorylation
GO:0000077	DNA damage checkpoint	DNA-repair
GO:0031929	TOR signaling	signalling
GO:0051457	maintenance of protein location in nucleus	protein-processing
GO:0001833	inner cell mass cell proliferation	blastocyst
GO:0090383	phagosome acidification	cytosis-osome-vesicle
GO:0007035	vacuolar acidification	metabolic-biosynthesis
GO:1901998	toxin transport	transport
GO:0048010	vascular endothelial growth factor receptor signaling pathway	blood-vessel
GO:0031295	T cell costimulation	lymphoid
GO:0046579	positive regulation of Ras protein signal transduction	MAPK
GO:0007286	spermatid development	reproduction
GO:0071225	cellular response to muramyl dipeptide	cellular-response
GO:0001893	maternal placenta development	blastocyst
GO:0060137	maternal process involved in parturition	reproduction
GO:1903547	regulation of growth hormone activity	growth-regulation
GO:0046888	negative regulation of hormone secretion	secretion
GO:0050482	arachidonic acid secretion	secretion
GO:0002223	stimulatory C-type lectin receptor signaling pathway	signalling
GO:0006521	regulation of cellular amino acid metabolic process	metabolic-biosynthesis
GO:0010972	negative regulation of G2/M transition of mitotic cell cycle	cell-division
GO:0031146	SCF-dependent proteasomal ubiquitin-dependent protein catabolic process	catabolic
GO:0038061	NIK/NF-kappaB signaling	signalling
GO:0061418	regulation of transcription from RNA polymerase II promoter in response to hypoxia	transcription
GO:0070498	interleukin-1-mediated signaling pathway	immune
GO:1902036	regulation of hematopoietic stem cell differentiation	hematopoiesis
GO:0001707	mesoderm formation	mesoderm
GO:0001708	cell fate specification	differentiation
GO:0003007	heart morphogenesis	heart
GO:0045595	regulation of cell differentiation	differentiation
GO:0006913	nucleocytoplasmic transport	transport
GO:0009267	cellular response to starvation	cellular-response
GO:0010830	regulation of myotube differentiation	muscle
GO:0032436	positive regulation of proteasomal ubiquitin-dependent protein catabolic process	catabolic
GO:0048742	regulation of skeletal muscle fiber development	muscle
GO:0002224	toll-like receptor signaling pathway	immune
GO:0002755	MyD88-dependent toll-like receptor signaling pathway	immune
GO:0007250	activation of NF-kappaB-inducing kinase activity	kinase
GO:0001959	regulation of cytokine-mediated signaling pathway	signalling
GO:0034162	toll-like receptor 9 signaling pathway	immune
GO:0070423	nucleotide-binding oligomerization domain containing signaling pathway	signalling
GO:0034142	toll-like receptor 4 signaling pathway	immune
GO:0034134	toll-like receptor 2 signaling pathway	immune
GO:0038128	ERBB2 signaling pathway	growth-regulation
GO:0048513	animal organ development	morphogenesis
GO:2000145	regulation of cell motility	migration
GO:0006465	signal peptide processing	signalling
GO:2000650	negative regulation of sodium ion transmembrane transporter activity	transport
GO:0030071	regulation of mitotic metaphase/anaphase transition	cell-division
GO:0032781	positive regulation of ATPase activity	mitochondrion
GO:0006293	nucleotide-excision repair, preincision complex stabilization	DNA-repair
GO:0006295	nucleotide-excision repair, DNA incision, 3'-to lesion	DNA-repair
GO:0006296	nucleotide-excision repair, DNA incision, 5'-to lesion	DNA-repair
GO:0070911	global genome nucleotide-excision repair	DNA-repair
GO:0000717	nucleotide-excision repair, DNA duplex unwinding	DNA-repair
GO:0002381	immunoglobulin production involved in immunoglobulin mediated immune response	immune
GO:0002455	humoral immune response mediated by circulating immunoglobulin	immune
GO:0006418	tRNA aminoacylation for protein translation	translation
GO:0006438	valyl-tRNA aminoacylation	ribosome
GO:0106074	aminoacyl-tRNA metabolism involved in translational fidelity	translation
GO:0046849	bone remodeling	osteo-bone
GO:0021772	olfactory bulb development	olfactory
GO:0051965	positive regulation of synapse assembly	synapse
GO:0022400	regulation of rhodopsin mediated signaling pathway	eye
GO:0031284	positive regulation of guanylate cyclase activity	brain
GO:0010820	positive regulation of T cell chemotaxis	environment-sensing
GO:1905606	regulation of presynapse assembly	synapse
GO:0099560	synaptic membrane adhesion	synapse
GO:0030855	epithelial cell differentiation	differentiation
GO:0001824	blastocyst development	blastocyst
GO:0060056	mammary gland involution	glands
GO:0008544	epidermis development	epidermis
GO:1904382	mannose trimming involved in glycoprotein ERAD pathway	protein-processing
GO:0006516	glycoprotein catabolic process	catabolic
GO:0045776	negative regulation of blood pressure	blood-vessel
GO:0055013	cardiac muscle cell development	muscle
GO:0006703	estrogen biosynthetic process	metabolic-biosynthesis
GO:0008210	estrogen metabolic process	metabolic-biosynthesis
GO:0061370	testosterone biosynthetic process	metabolic-biosynthesis
GO:0071248	cellular response to metal ion	cellular-response
GO:0048012	hepatocyte growth factor receptor signaling pathway	liver
GO:0009058	biosynthetic process	metabolic-biosynthesis
GO:0015807	L-amino acid transport	transport
GO:0003333	amino acid transmembrane transport	transport
GO:0006865	amino acid transport	transport
GO:1902475	L-alpha-amino acid transmembrane transport	transport
GO:0015804	neutral amino acid transport	transport
GO:0007040	lysosome organization	cytosis-osome-vesicle
GO:0021680	cerebellar Purkinje cell layer development	brain
GO:0042474	middle ear morphogenesis	auditory
GO:0045475	locomotor rhythm	muscle
GO:0046548	retinal rod cell development	eye
GO:0060119	inner ear receptor cell development	auditory
GO:0006027	glycosaminoglycan catabolic process	catabolic
GO:0045907	positive regulation of vasoconstriction	blood-vessel
GO:0045777	positive regulation of blood pressure	blood-vessel
GO:0038193	thromboxane A2 signaling pathway	blood-vessel
GO:0019229	regulation of vasoconstriction	blood-vessel
GO:0019932	second-messenger-mediated signaling	blood-vessel
GO:0030194	positive regulation of blood coagulation	blood-vessel
GO:0045987	positive regulation of smooth muscle contraction	muscle
GO:0050771	negative regulation of axonogenesis	neuron
GO:0090315	negative regulation of protein targeting to membrane	protein-processing
GO:0032482	Rab protein signal transduction	protein-processing
GO:0001933	negative regulation of protein phosphorylation	phosphorylation
GO:0032688	negative regulation of interferon-beta production	immune
GO:0060339	negative regulation of type I interferon-mediated signaling pathway	immune
GO:0032717	negative regulation of interleukin-8 production	immune
GO:0032689	negative regulation of interferon-gamma production	immune
GO:0090023	positive regulation of neutrophil chemotaxis	myeloid
GO:0002725	negative regulation of T cell cytokine production	lymphoid
GO:0051281	positive regulation of release of sequestered calcium ion into cytosol	calcium
GO:0032703	negative regulation of interleukin-2 production	immune
GO:0002726	positive regulation of T cell cytokine production	lymphoid
GO:2000553	positive regulation of T-helper 2 cell cytokine production	lymphoid
GO:2000563	positive regulation of CD4-positive, alpha-beta T cell proliferation	lymphoid
GO:0002826	negative regulation of T-helper 1 type immune response	lymphoid
GO:0035782	mature natural killer cell chemotaxis	environment-sensing
GO:0071353	cellular response to interleukin-4	immune
GO:0071663	positive regulation of granzyme B production	immune
GO:2000412	positive regulation of thymocyte migration	immune
GO:2000503	positive regulation of natural killer cell chemotaxis	environment-sensing
GO:2000513	positive regulation of granzyme A production	immune
GO:2000518	negative regulation of T-helper 1 cell activation	lymphoid
GO:2000538	positive regulation of B cell chemotaxis	lymphoid
GO:2000556	positive regulation of T-helper 1 cell cytokine production	lymphoid
GO:2000558	positive regulation of immunoglobulin production in mucosal tissue	immune
GO:2000562	negative regulation of CD4-positive, alpha-beta T cell proliferation	lymphoid
GO:2000566	positive regulation of CD8-positive, alpha-beta T cell proliferation	lymphoid
GO:0061640	cytoskeleton-dependent cytokinesis	cell-division
GO:0043039	tRNA aminoacylation	ribosome
GO:0006419	alanyl-tRNA aminoacylation	ribosome
GO:0006450	regulation of translational fidelity	translation
GO:1905643	positive regulation of DNA methylation	methylation
GO:0090063	positive regulation of microtubule nucleation	cytoskeleton
GO:0001964	startle response	environment-sensing
GO:0001976	nervous system process involved in regulation of systemic arterial blood pressure	spine
GO:0002087	regulation of respiratory gaseous exchange by nervous system process	lung
GO:0006020	inositol metabolic process	metabolic-biosynthesis
GO:0006342	chromatin silencing	histone-chromatin
GO:0006541	glutamine metabolic process	metabolic-biosynthesis
GO:0006576	cellular biogenic amine metabolic process	metabolic-biosynthesis
GO:0007416	synapse assembly	synapse
GO:0007585	respiratory gaseous exchange by respiratory system	lung
GO:0007612	learning	behavior
GO:0008211	glucocorticoid metabolic process	metabolic-biosynthesis
GO:0008344	adult locomotory behavior	behavior
GO:0009405	pathogenesis	immune
GO:0009791	post-embryonic development	blastocyst
GO:0016358	dendrite development	brain
GO:0016571	histone methylation	histone-chromatin
GO:0019230	proprioception	brain
GO:0019233	sensory perception of pain	brain
GO:0021591	ventricular system development	heart
GO:0032048	cardiolipin metabolic process	metabolic-biosynthesis
GO:0033555	multicellular organismal response to stress	stress-response
GO:0035176	social behavior	behavior
GO:0040029	regulation of gene expression, epigenetic	methylation
GO:0042551	neuron maturation	neuron
GO:0046470	phosphatidylcholine metabolic process	metabolic-biosynthesis
GO:0050432	catecholamine secretion	secretion
GO:0050884	neuromuscular process controlling posture	muscle
GO:0050905	neuromuscular process	muscle
GO:0051151	negative regulation of smooth muscle cell differentiation	muscle
GO:0060291	long-term synaptic potentiation	synapse
GO:1900114	positive regulation of histone H3-K9 trimethylation	histone-chromatin
GO:2000820	negative regulation of transcription from RNA polymerase II promoter involved in smooth muscle cell differentiation	transcription
GO:0006414	translational elongation	translation
GO:1904714	regulation of chaperone-mediated autophagy	cell-death
GO:1900022	regulation of D-erythro-sphingosine kinase activity	red-blood
GO:0007589	body fluid secretion	secretion
GO:0007168	receptor guanylyl cyclase signaling pathway	signalling
GO:0007602	phototransduction	eye
GO:0031282	regulation of guanylate cyclase activity	metabolic-biosynthesis
GO:0006820	anion transport	transport
GO:0015739	sialic acid transport	transport
GO:0034219	carbohydrate transmembrane transport	transport
GO:0006892	post-Golgi vesicle-mediated transport	transport
GO:0010466	negative regulation of peptidase activity	regeneration-healing
GO:0061045	negative regulation of wound healing	regeneration-healing
GO:0001942	hair follicle development	hair
GO:0010839	negative regulation of keratinocyte proliferation	epidermis
GO:0045616	regulation of keratinocyte differentiation	epidermis
GO:0072675	osteoclast fusion	osteo-bone
GO:0050672	negative regulation of lymphocyte proliferation	lymphoid
GO:0006165	nucleoside diphosphate phosphorylation	phosphorylation
GO:0006183	GTP biosynthetic process	brain
GO:0006228	UTP biosynthetic process	metabolic-biosynthesis
GO:0006241	CTP biosynthetic process	metabolic-biosynthesis
GO:0009117	nucleotide metabolic process	metabolic-biosynthesis
GO:0030101	natural killer cell activation	lymphoid
GO:0002429	immune response-activating cell surface receptor signaling pathway	immune
GO:0008037	cell recognition	ecm
GO:0140112	extracellular vesicle biogenesis	ecm
GO:0043001	Golgi to plasma membrane protein transport	transport
GO:0001558	regulation of cell growth	growth-regulation
GO:0010248	establishment or maintenance of transmembrane electrochemical gradient	transport
GO:0010882	regulation of cardiac muscle contraction by calcium ion signaling	calcium
GO:0030001	metal ion transport	transport
GO:0055119	relaxation of cardiac muscle	muscle
GO:0060048	cardiac muscle contraction	muscle
GO:1903169	regulation of calcium ion transmembrane transport	transport
GO:1903281	positive regulation of calcium:sodium antiporter activity	calcium
GO:1903278	positive regulation of sodium ion export across plasma membrane	muscle
GO:1903779	regulation of cardiac conduction	heart
GO:0030007	cellular potassium ion homeostasis	homeostasis
GO:0036376	sodium ion export across plasma membrane	muscle
GO:0086009	membrane repolarization	muscle
GO:0086013	membrane repolarization during cardiac muscle cell action potential	muscle
GO:0086064	cell communication by electrical coupling involved in cardiac conduction	ecm
GO:0044861	protein transport into plasma membrane raft	transport
GO:0046034	ATP metabolic process	metabolic-biosynthesis
GO:1901018	positive regulation of potassium ion transmembrane transporter activity	transport
GO:1903288	positive regulation of potassium ion import across plasma membrane	transport
GO:0048208	COPII vesicle coating	transport
GO:0014029	neural crest formation	neural-crest
GO:0014032	neural crest cell development	neural-crest
GO:0046885	regulation of hormone biosynthetic process	metabolic-biosynthesis
GO:0006707	cholesterol catabolic process	catabolic
GO:0010976	positive regulation of neuron projection development	neuron
GO:0016322	neuron remodeling	neuron
GO:0048680	positive regulation of axon regeneration	regeneration-healing
GO:0061647	histone H3-K9 modification	histone-chromatin
GO:1990619	histone H3-K9 deacetylation	histone-chromatin
GO:0070932	histone H3 deacetylation	histone-chromatin
GO:0032206	positive regulation of telomere maintenance	telomere
GO:0006471	protein ADP-ribosylation	protein-processing
GO:0003247	post-embryonic cardiac muscle cell growth involved in heart morphogenesis	muscle
GO:0006284	base-excision repair	DNA-repair
GO:0006476	protein deacetylation	protein-processing
GO:0031940	positive regulation of chromatin silencing at telomere	histone-chromatin
GO:0046325	negative regulation of glucose import	metabolic-biosynthesis
GO:1901485	positive regulation of transcription factor catabolic process	transcription
GO:1902732	positive regulation of chondrocyte proliferation	osteo-bone
[truncated: 10,486 more rows]
