# Supplementary figures and images for: Control of tissue development and cell diversity by cell cycle-dependent transcriptional filtering
Source: eLife journal article supplement (doi:10.7554/elife.64951), 2021-07-02

A

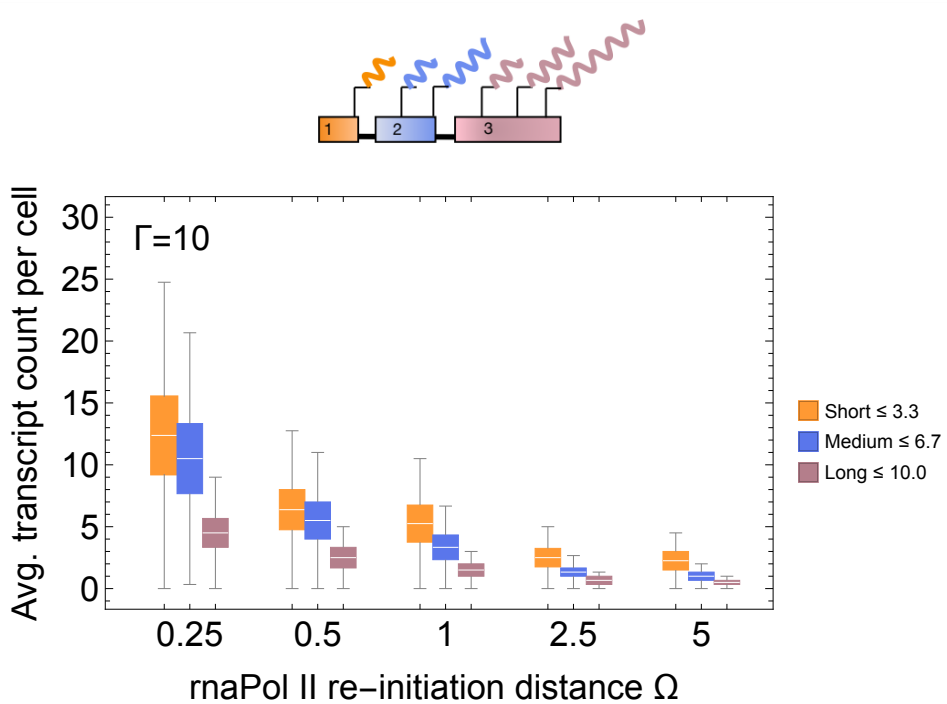

B

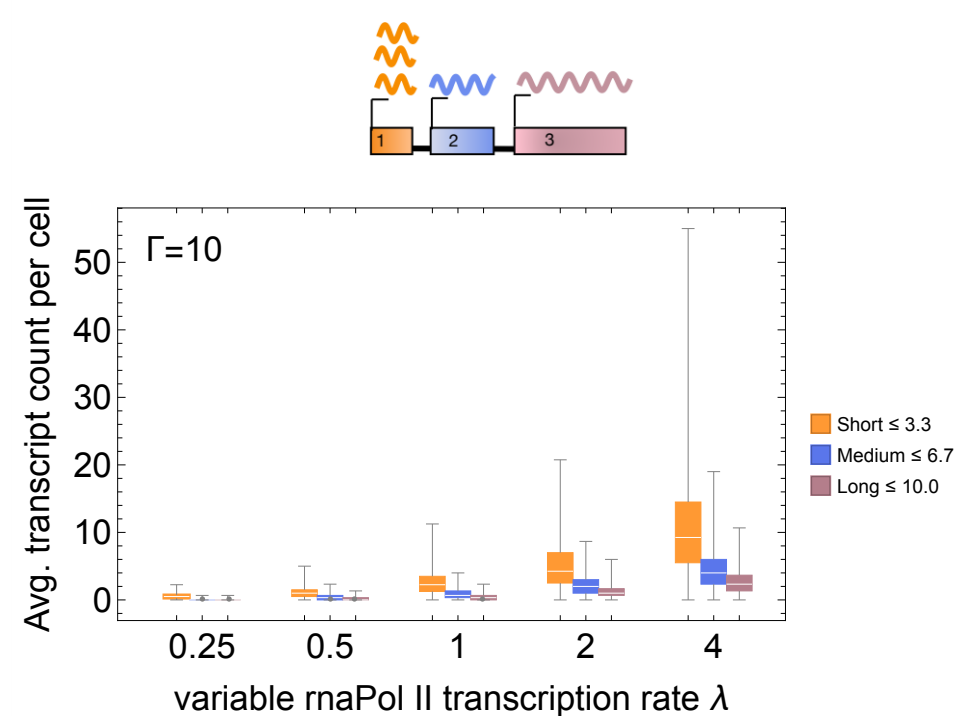

C

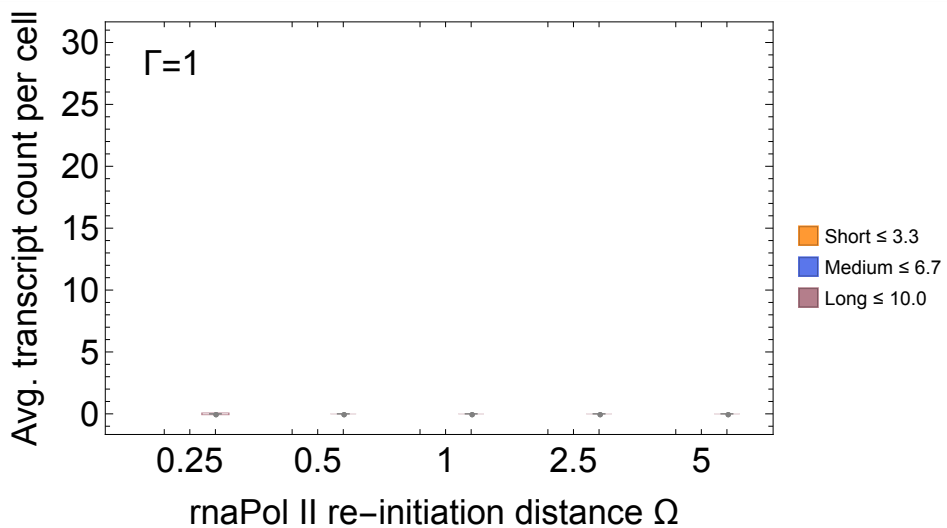

D

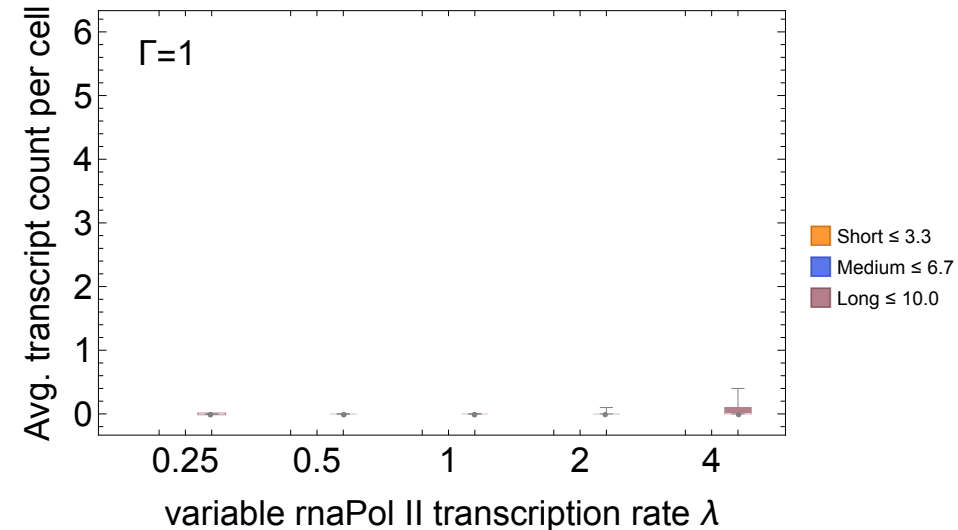

E

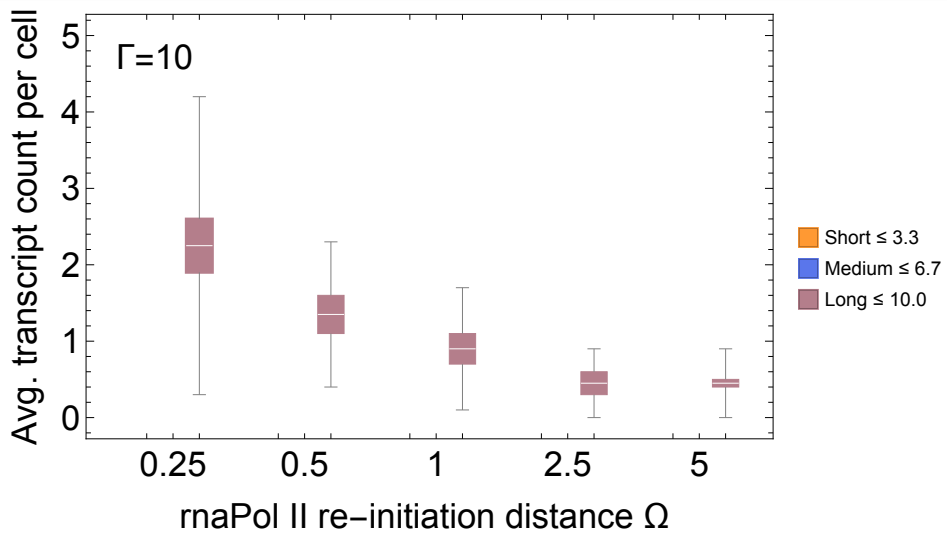

F

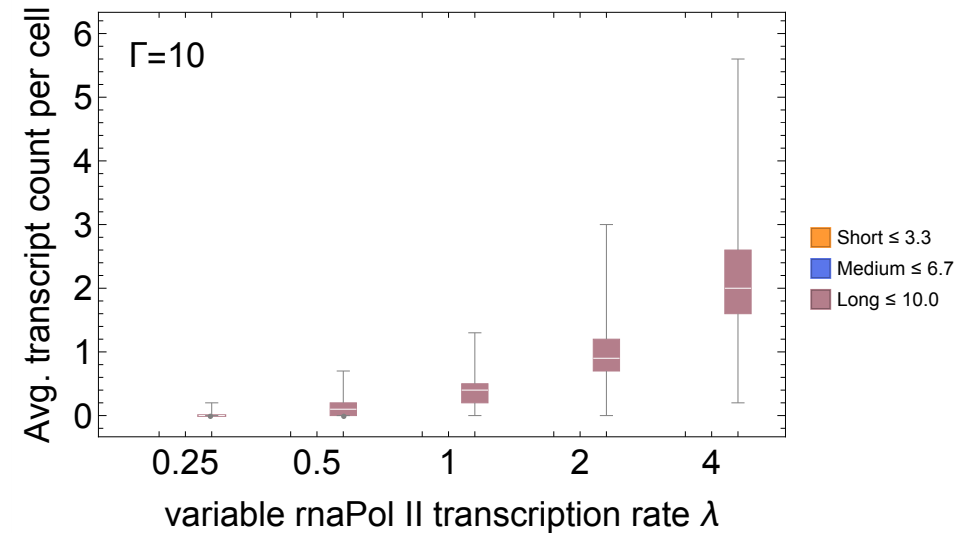

Supplement: supp [file elife-64951-supp-v1.zip]

# Simulations

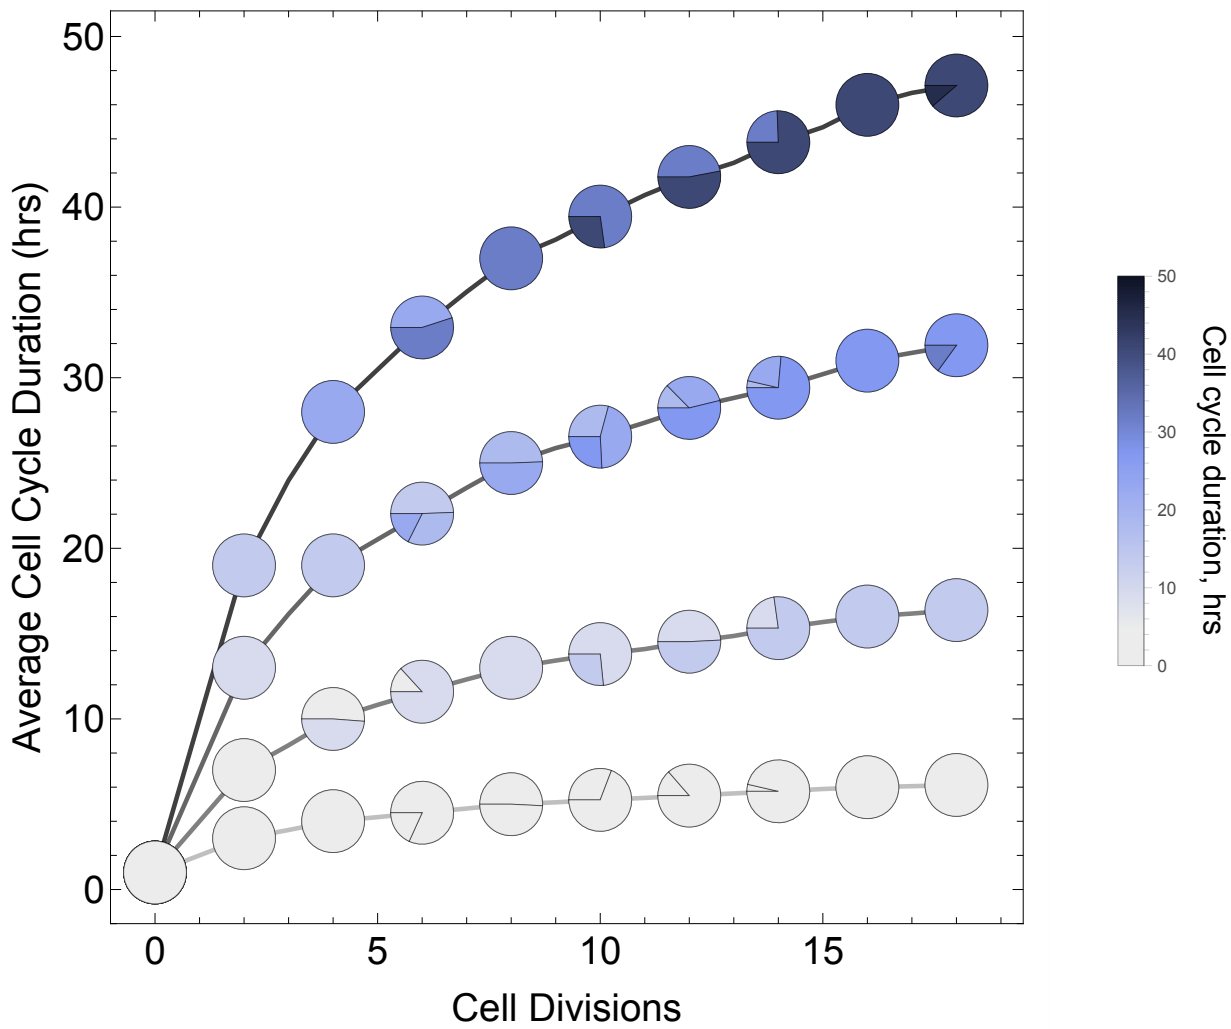

Supplement: supp [file elife-64951-supp-v1.zip]

$$E_{11.5} < E_{13.5} < E_{15.5} < E_{17.5}$$
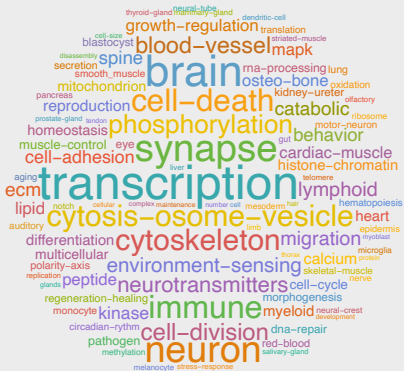
$$E_{11.5} > E_{13.5} > E_{15.5} > E_{17.5}$$
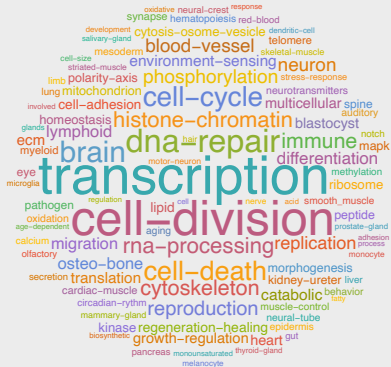

Supplement: supp [file elife-64951-supp-v1.zip]

**A**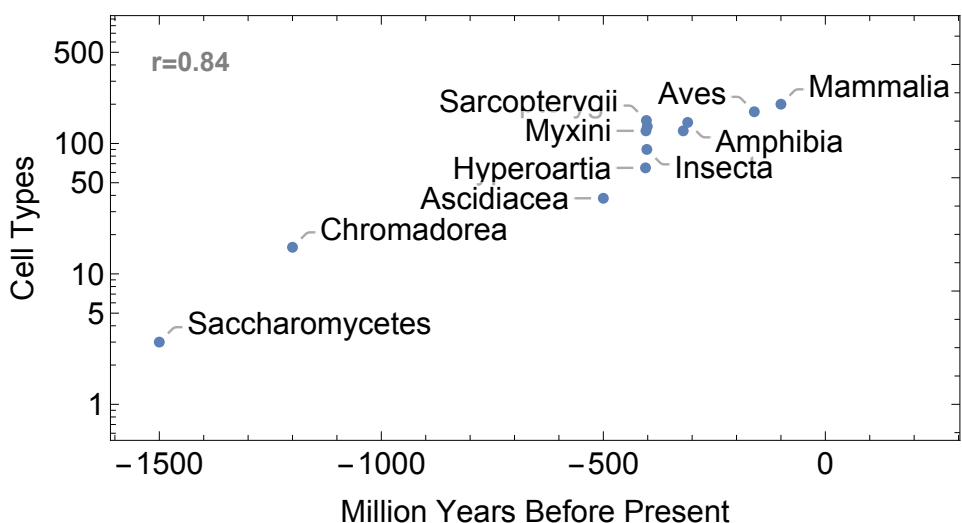**B**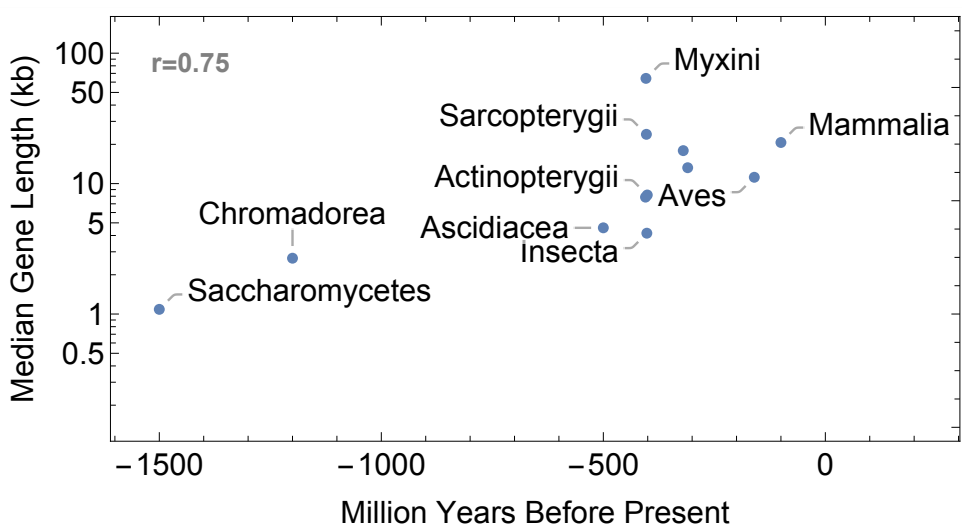**C**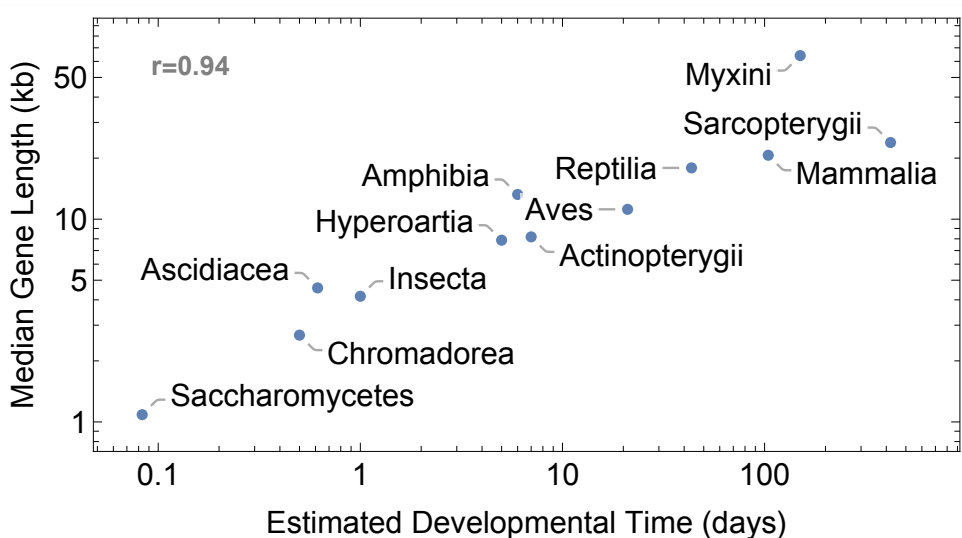

Supplement: supp [file elife-64951-supp-v1.zip]

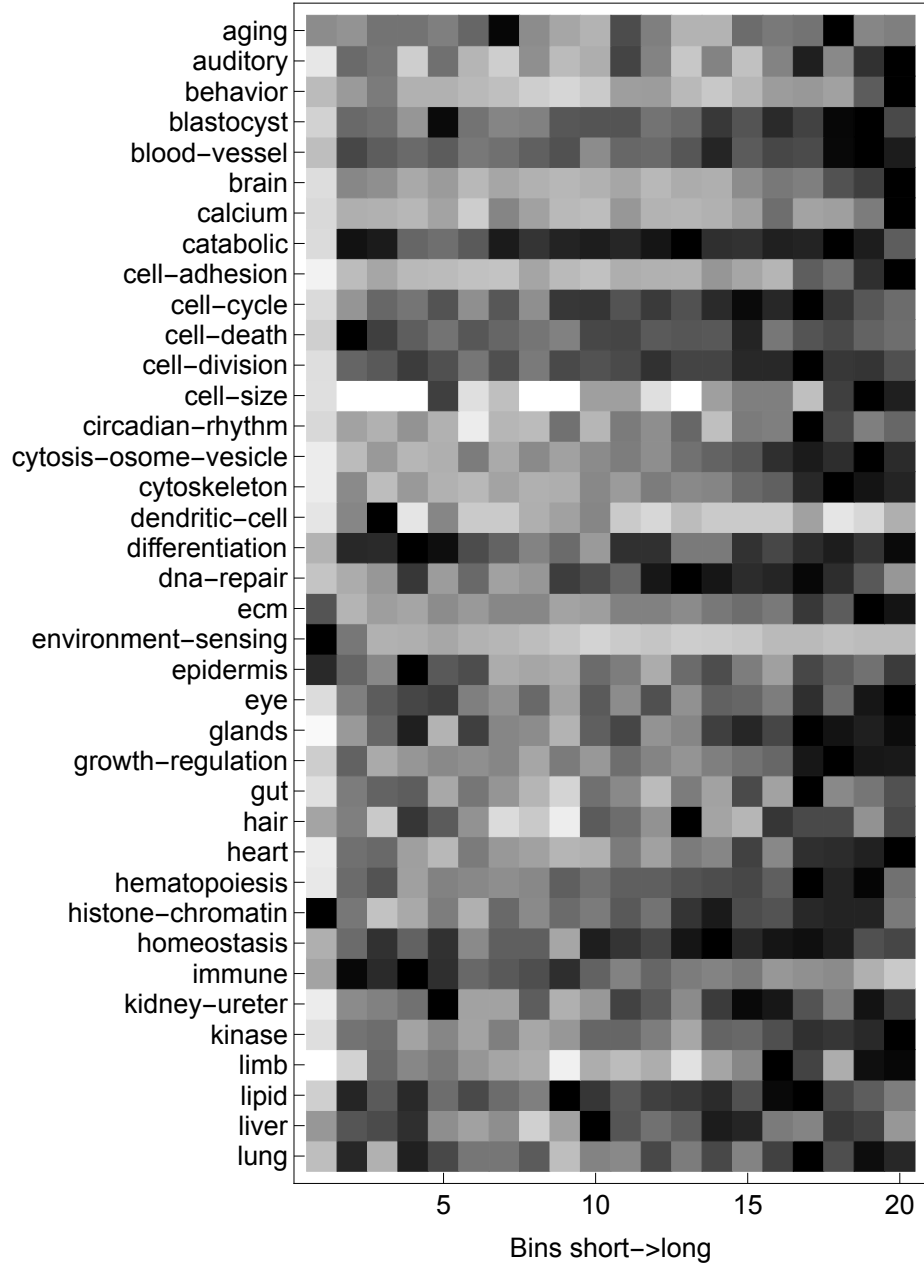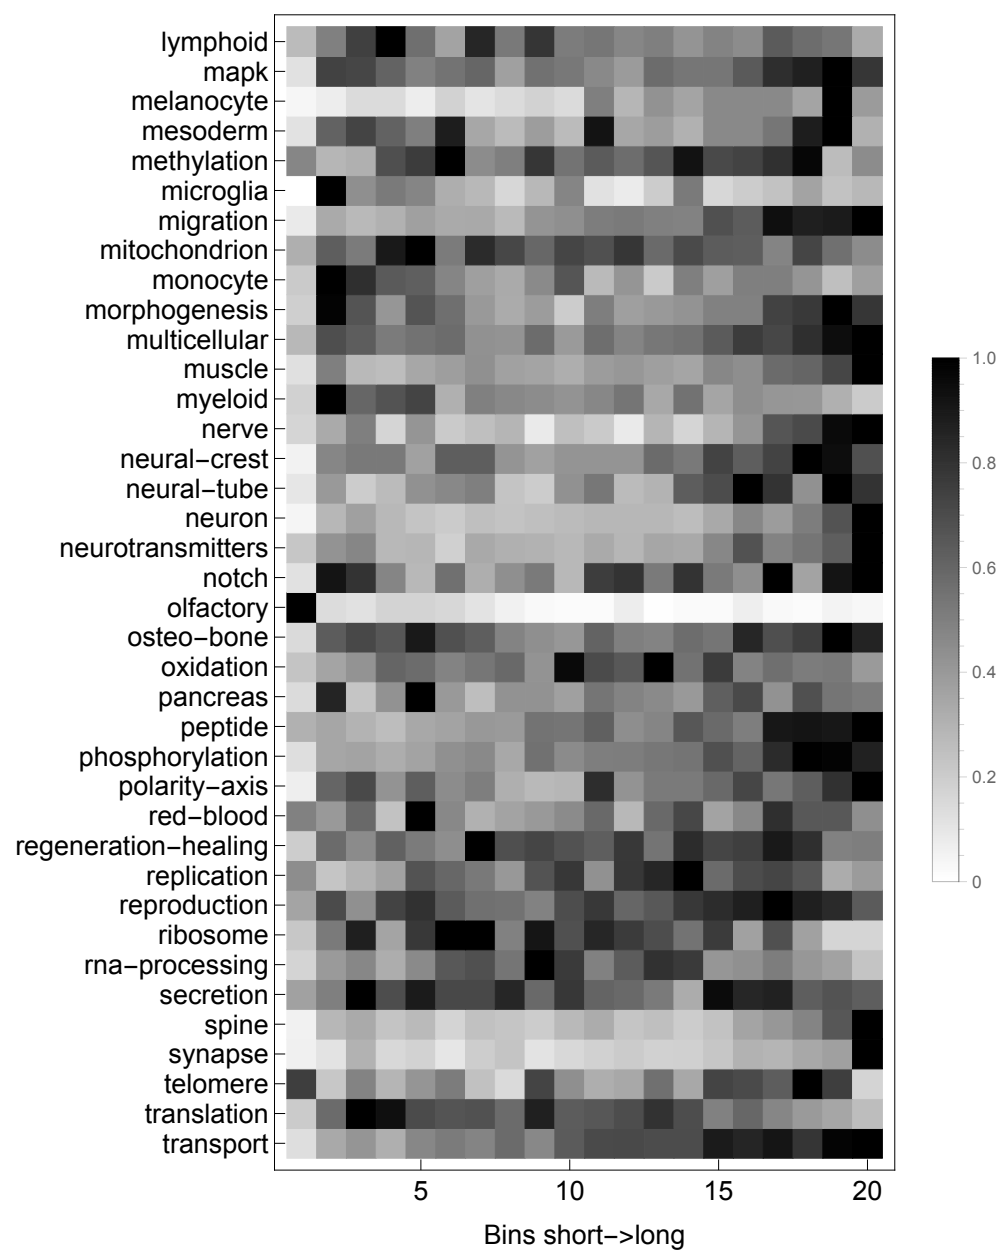

Supplement: supp [file elife-64951-supp-v1.zip]

**A**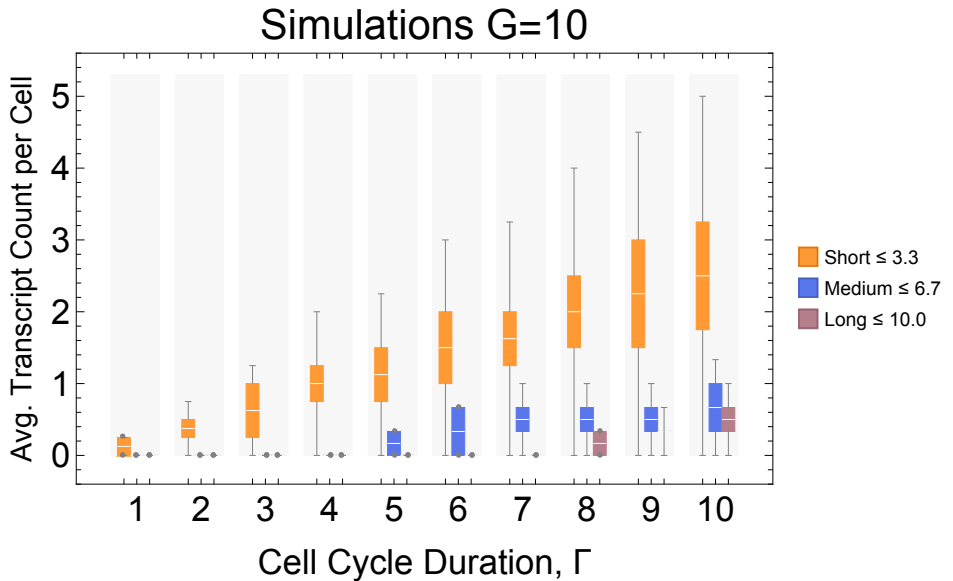**B**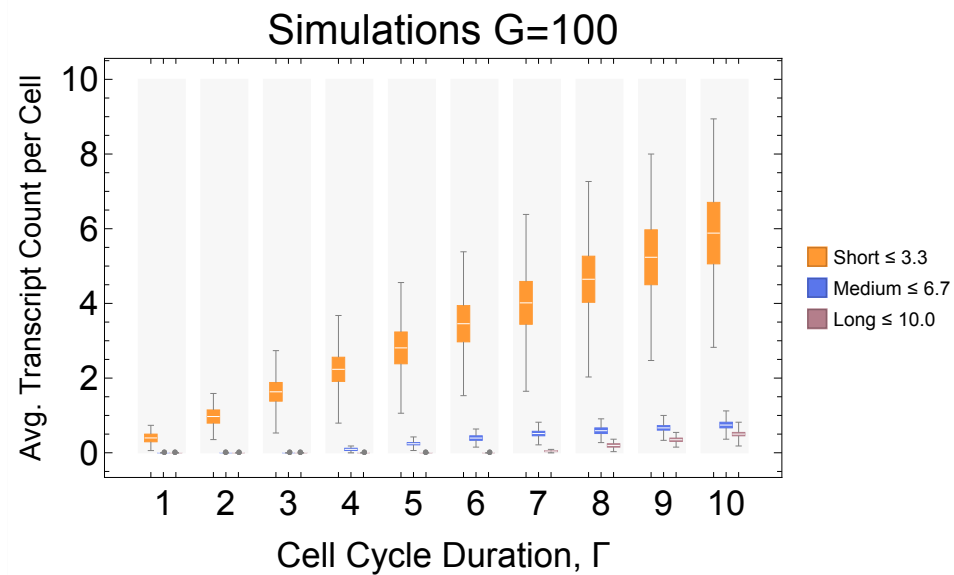**C**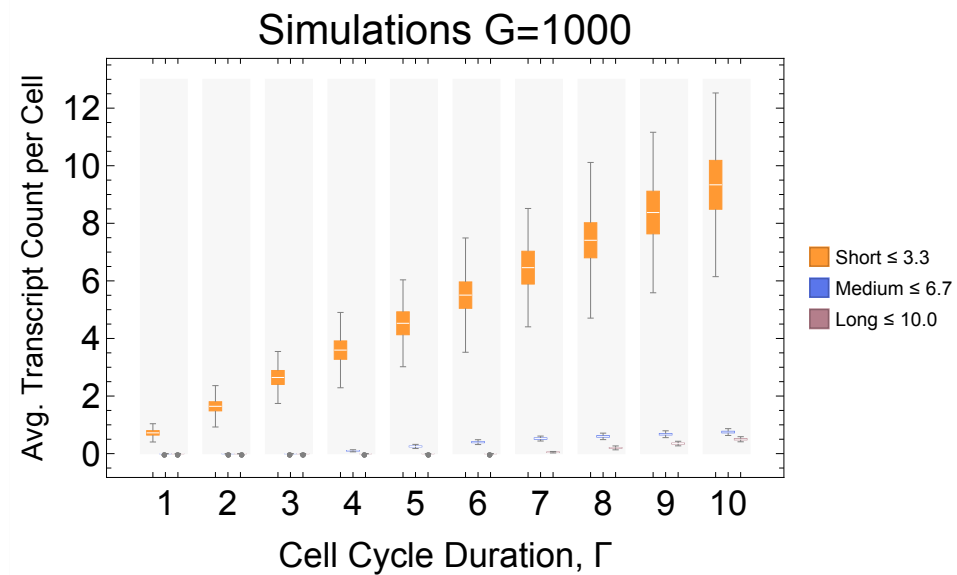

Supplement: supp [file elife-64951-supp-v1.zip]

**A**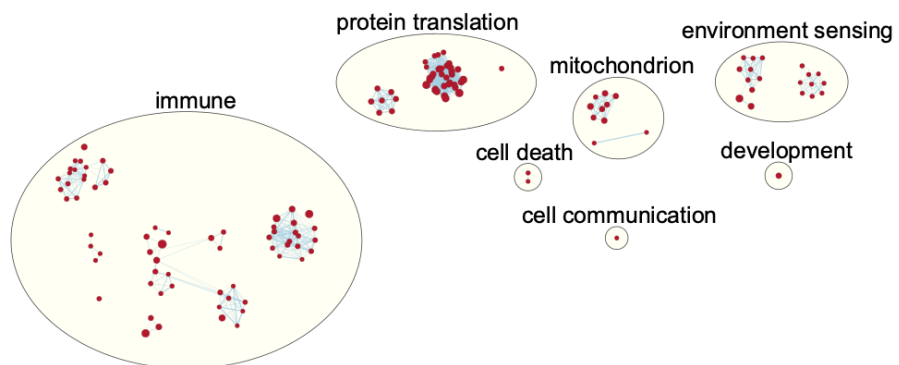**B**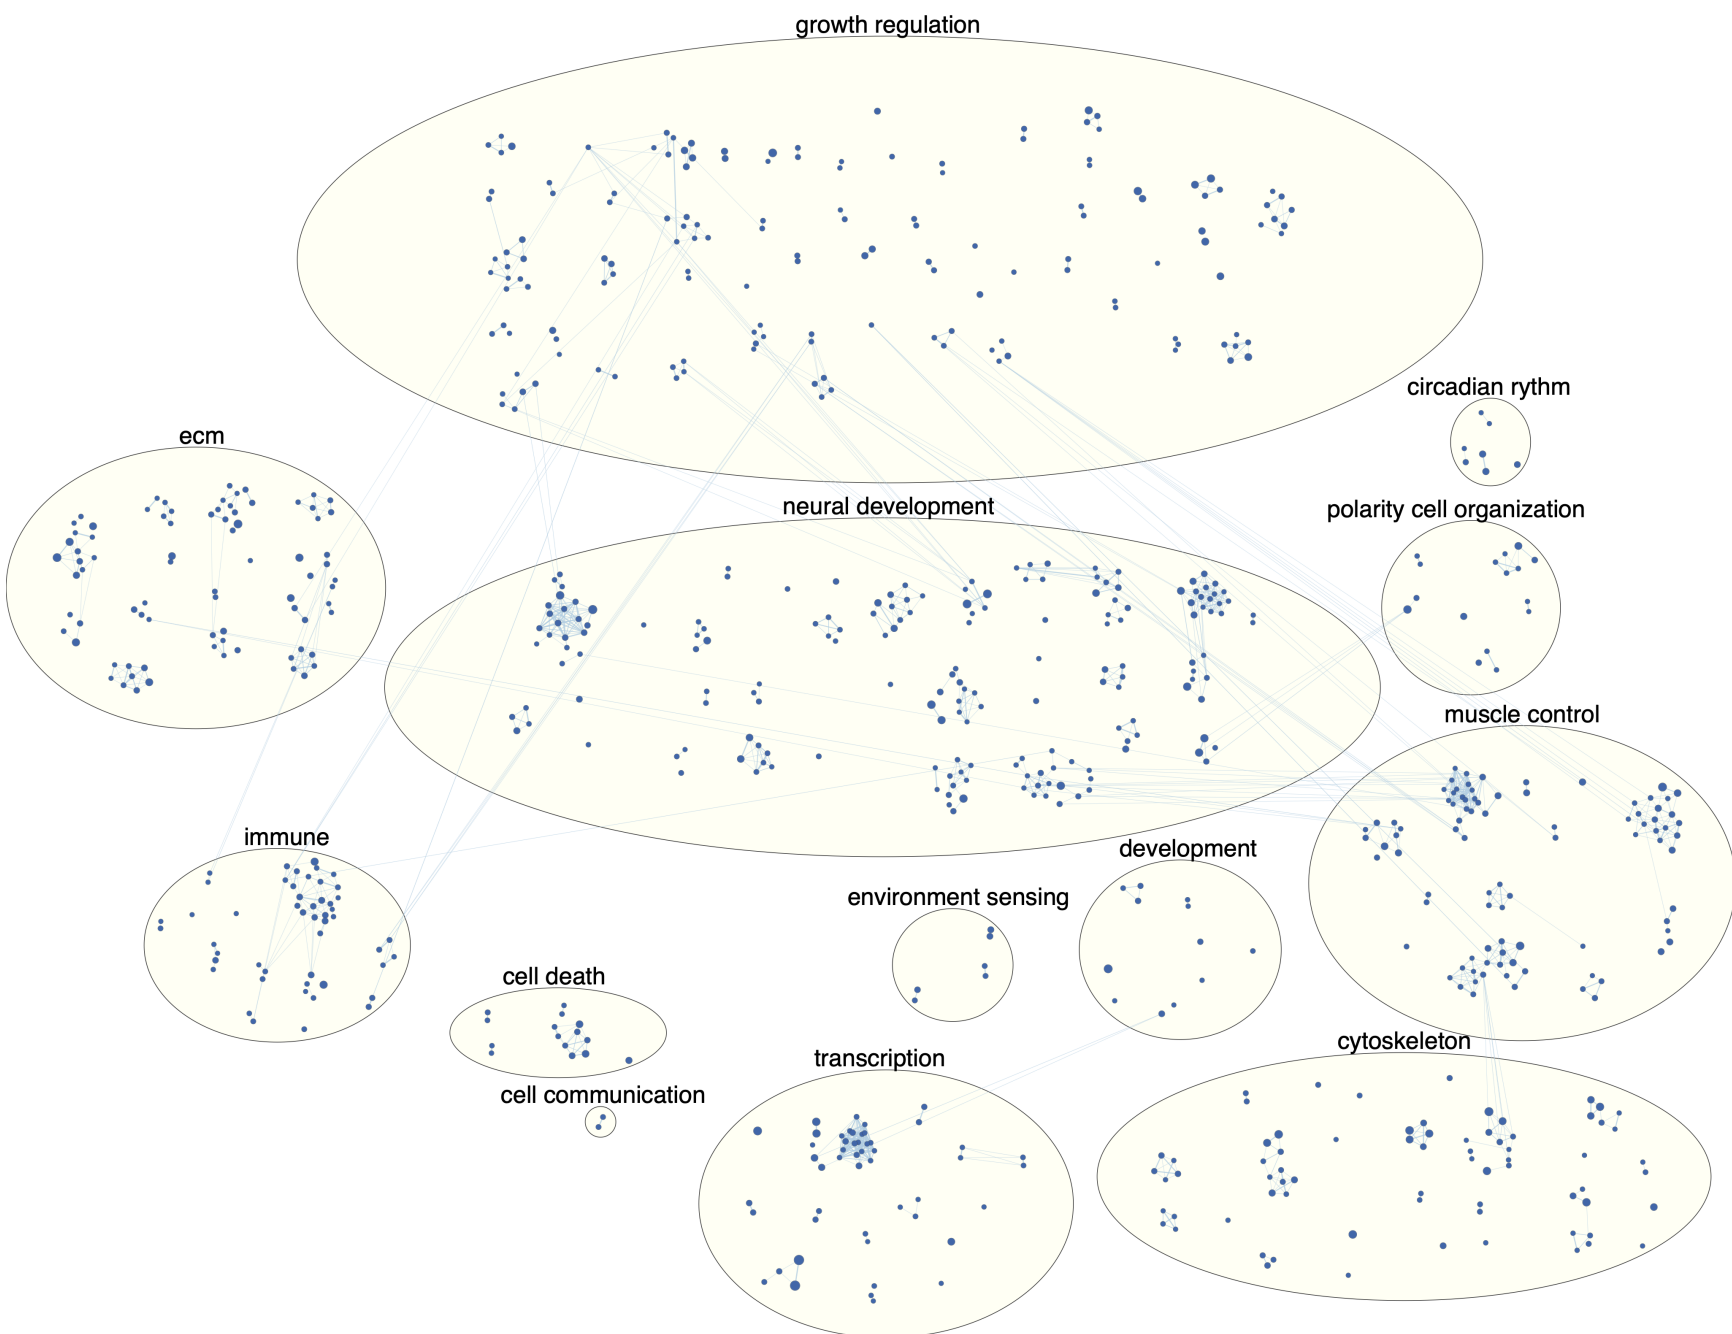

Supplement: supp [file elife-64951-supp-v1.zip]

**A**

## Simulation

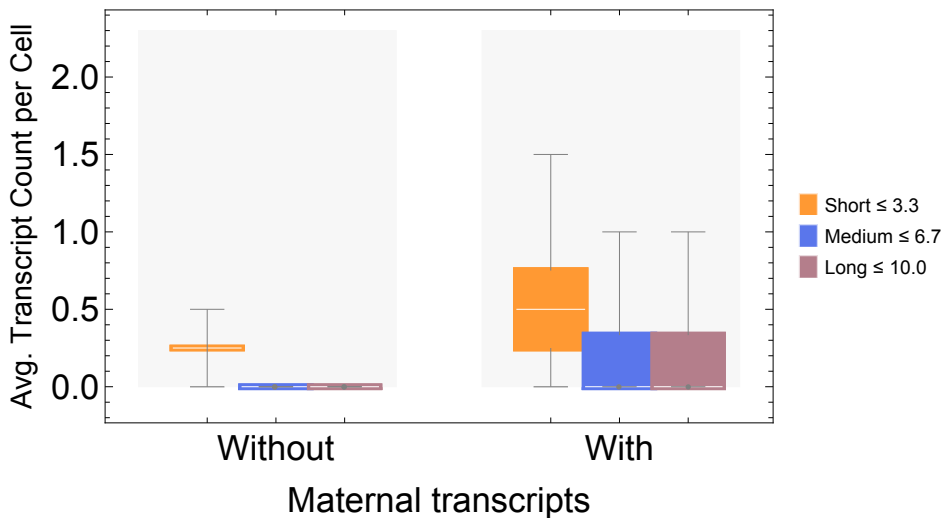**B**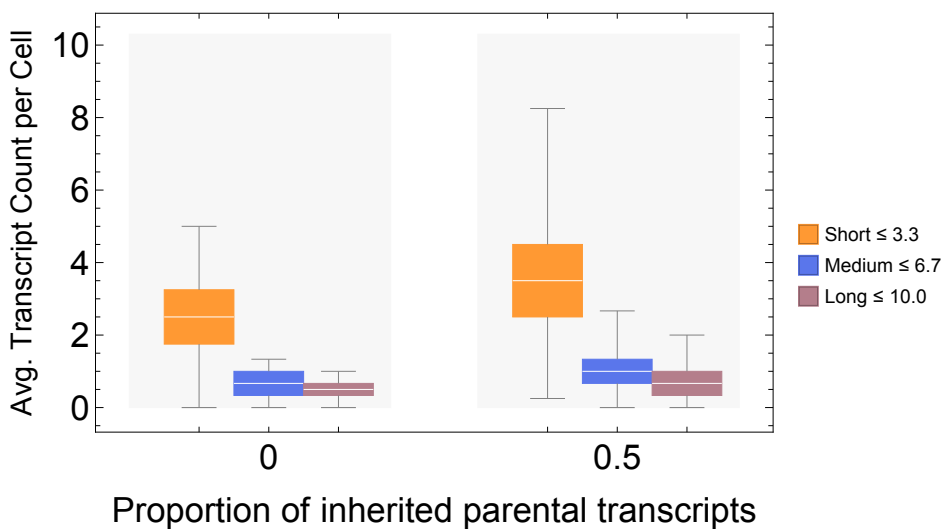

Supplement: supp [file elife-64951-supp-v1.zip]
